# Supplementary material for: Pharmacological and non-pharmacological strategies for preventing postherpetic neuralgia: a systematic review and network meta-analysis
Source: PubMed Central journal article supplement — Korean J Pain. 2021 Oct 1;34(4):509–33. doi: 10.3344/kjp.2021.34.4.509 (PMC8494957; doi:10.3344/kjp.2021.34.4.509), 2021-10-01

# Supplementary Table 1. League table

(A)

| EPI-LSE             |                      |                      |                     |                     |                     |                     |                     |                     |                     |                     |                     |                     |                     |                     |                     |           |
|---------------------|----------------------|----------------------|---------------------|---------------------|---------------------|---------------------|---------------------|---------------------|---------------------|---------------------|---------------------|---------------------|---------------------|---------------------|---------------------|-----------|
| 0.25<br>(0.02,2.76) | <b>AV+sLS</b>        |                      |                     |                     |                     |                     |                     |                     |                     |                     |                     |                     |                     |                     |                     |           |
| 0.24<br>(0.03,2.20) | 0.93<br>(0.09,9.91)  | <b>AV+iLS</b>        |                     |                     |                     |                     |                     |                     |                     |                     |                     |                     |                     |                     |                     |           |
| 0.25<br>(0.02,3.13) | 0.98<br>(0.07,13.90) | 1.05<br>(0.08,13.05) | <b>AV+AE-sLS</b>    |                     |                     |                     |                     |                     |                     |                     |                     |                     |                     |                     |                     |           |
| 0.15<br>(0.02,0.99) | 0.59<br>(0.08,4.57)  | 0.63<br>(0.10,4.11)  | 0.60<br>(0.07,4.86) | <b>AV+AE-pv</b>     |                     |                     |                     |                     |                     |                     |                     |                     |                     |                     |                     |           |
| 0.16<br>(0.02,1.52) | 0.65<br>(0.06,6.84)  | 0.69<br>(0.08,6.30)  | 0.66<br>(0.07,6.59) | 1.10<br>(0.20,5.98) | <b>AV+AE-iLS</b>    |                     |                     |                     |                     |                     |                     |                     |                     |                     |                     |           |
| 0.13<br>(0.05,0.36) | 0.53<br>(0.06,4.60)  | 0.57<br>(0.08,4.18)  | 0.54<br>(0.05,5.54) | 0.89<br>(0.18,4.46) | 0.82<br>(0.11,5.96) | <b>AV+SR</b>        |                     |                     |                     |                     |                     |                     |                     |                     |                     |           |
| 0.10<br>(0.01,0.81) | 0.40<br>(0.04,3.68)  | 0.43<br>(0.05,3.36)  | 0.41<br>(0.05,3.53) | 0.68<br>(0.15,3.04) | 0.62<br>(0.10,3.68) | 0.76<br>(0.12,4.69) | <b>AV+AE-cLS</b>    |                     |                     |                     |                     |                     |                     |                     |                     |           |
| 0.05<br>(0.01,0.35) | 0.21<br>(0.03,1.63)  | 0.23<br>(0.04,1.47)  | 0.22<br>(0.02,1.98) | 0.36<br>(0.09,1.50) | 0.33<br>(0.05,2.08) | 0.41<br>(0.08,1.98) | 0.54<br>(0.10,2.83) | <b>ENS</b>          |                     |                     |                     |                     |                     |                     |                     |           |
| 0.05<br>(0.01,0.31) | 0.20<br>(0.03,1.45)  | 0.22<br>(0.04,1.29)  | 0.21<br>(0.02,1.78) | 0.34<br>(0.09,1.29) | 0.31<br>(0.05,1.84) | 0.39<br>(0.09,1.73) | 0.51<br>(0.10,2.49) | 0.95<br>(0.26,3.49) | <b>AV-eLS</b>       |                     |                     |                     |                     |                     |                     |           |
| 0.05<br>(0.01,0.40) | 0.19<br>(0.02,1.79)  | 0.20<br>(0.02,1.64)  | 0.19<br>(0.02,2.03) | 0.32<br>(0.06,1.72) | 0.29<br>(0.04,2.19) | 0.35<br>(0.05,2.31) | 0.47<br>(0.07,3.03) | 0.87<br>(0.16,4.79) | 0.92<br>(0.18,4.72) | <b>AE</b>           |                     |                     |                     |                     |                     |           |
| 0.05<br>(0.01,0.27) | 0.19<br>(0.03,1.26)  | 0.20<br>(0.04,1.11)  | 0.19<br>(0.03,1.19) | 0.31<br>(0.12,0.85) | 0.29<br>(0.07,1.14) | 0.35<br>(0.08,1.47) | 0.47<br>(0.15,1.45) | 0.87<br>(0.26,2.91) | 0.91<br>(0.30,2.75) | 1.00<br>(0.23,4.40) | <b>AV+AE</b>        |                     |                     |                     |                     |           |
| 0.04<br>(0.01,0.24) | 0.18<br>(0.03,1.12)  | 0.19<br>(0.04,0.98)  | 0.18<br>(0.02,1.35) | 0.30<br>(0.10,0.92) | 0.27<br>(0.05,1.36) | 0.33<br>(0.09,1.28) | 0.44<br>(0.11,1.80) | 0.82<br>(0.28,2.39) | 0.86<br>(0.32,2.35) | 0.94<br>(0.23,3.95) | 0.95<br>(0.41,2.18) | <b>CTR</b>          |                     |                     |                     |           |
| 0.04<br>(0.01,0.21) | 0.17<br>(0.03,0.99)  | 0.18<br>(0.04,0.86)  | 0.17<br>(0.02,1.23) | 0.28<br>(0.10,0.79) | 0.26<br>(0.05,1.22) | 0.32<br>(0.09,1.09) | 0.42<br>(0.11,1.60) | 0.78<br>(0.29,2.09) | 0.82<br>(0.35,1.90) | 0.90<br>(0.22,3.65) | 0.90<br>(0.44,1.83) | 0.95<br>(0.56,1.60) | <b>AV</b>           |                     |                     |           |
| 0.03<br>(0.00,0.40) | 0.12<br>(0.01,1.78)  | 0.13<br>(0.01,1.67)  | 0.12<br>(0.01,2.03) | 0.20<br>(0.02,1.95) | 0.18<br>(0.01,2.33) | 0.22<br>(0.02,2.46) | 0.29<br>(0.03,3.35) | 0.54<br>(0.06,5.34) | 0.57<br>(0.06,5.33) | 0.62<br>(0.07,5.37) | 0.63<br>(0.07,5.43) | 0.66<br>(0.08,5.36) | 0.70<br>(0.09,5.52) | <b>RTx</b>          |                     |           |
| 0.02<br>(0.00,0.15) | 0.09<br>(0.01,0.68)  | 0.09<br>(0.01,0.61)  | 0.09<br>(0.01,0.83) | 0.15<br>(0.03,0.63) | 0.14<br>(0.02,0.87) | 0.17<br>(0.03,0.84) | 0.22<br>(0.04,1.19) | 0.41<br>(0.12,1.37) | 0.43<br>(0.11,1.64) | 0.47<br>(0.08,2.64) | 0.47<br>(0.14,1.64) | 0.50<br>(0.17,1.47) | 0.53<br>(0.19,1.47) | 0.75<br>(0.08,7.53) | <b>AV-ENS</b>       |           |
| 0.01<br>(0.00,0.07) | 0.03<br>(0.00,0.33)  | 0.04<br>(0.00,0.30)  | 0.03<br>(0.00,0.38) | 0.06<br>(0.01,0.32) | 0.05<br>(0.01,0.42) | 0.06<br>(0.01,0.42) | 0.09<br>(0.01,0.58) | 0.16<br>(0.03,0.88) | 0.17<br>(0.03,0.86) | 0.18<br>(0.03,1.01) | 0.18<br>(0.04,0.86) | 0.19<br>(0.05,0.78) | 0.20<br>(0.05,0.84) | 0.29<br>(0.04,2.39) | 0.39<br>(0.07,2.17) | <b>SR</b> |

(B)

## EPI-LSE

|                     |                     |                     |                     |                     |                     |                     |                     |                     |                      |                     |                     |                     |                     |               |  |
|---------------------|---------------------|---------------------|---------------------|---------------------|---------------------|---------------------|---------------------|---------------------|----------------------|---------------------|---------------------|---------------------|---------------------|---------------|--|
| 0.21<br>(0.03,1.28) | <b>AV+AE-pV</b>     |                     |                     |                     |                     |                     |                     |                     |                      |                     |                     |                     |                     |               |  |
| 0.21<br>(0.03,1.37) | 1.01<br>(0.19,5.36) | <b>AV+ILS</b>       |                     |                     |                     |                     |                     |                     |                      |                     |                     |                     |                     |               |  |
| 0.17<br>(0.02,1.38) | 0.84<br>(0.13,5.50) | 0.84<br>(0.12,5.79) | <b>AV+sLS</b>       |                     |                     |                     |                     |                     |                      |                     |                     |                     |                     |               |  |
| 0.12<br>(0.05,0.28) | 0.59<br>(0.12,2.98) | 0.58<br>(0.11,3.17) | 0.70<br>(0.10,4.65) | <b>AV+SR</b>        |                     |                     |                     |                     |                      |                     |                     |                     |                     |               |  |
| 0.12<br>(0.01,0.97) | 0.56<br>(0.08,3.91) | 0.56<br>(0.08,4.11) | 0.67<br>(0.08,5.85) | 0.96<br>(0.13,6.79) | <b>VZVIG</b>        |                     |                     |                     |                      |                     |                     |                     |                     |               |  |
| 0.06<br>(0.01,0.54) | 0.27<br>(0.03,2.19) | 0.27<br>(0.03,2.29) | 0.32<br>(0.03,3.23) | 0.46<br>(0.06,3.80) | 0.48<br>(0.05,4.63) | <b>SR</b>           |                     |                     |                      |                     |                     |                     |                     |               |  |
| 0.05<br>(0.01,0.26) | 0.25<br>(0.06,0.98) | 0.25<br>(0.06,1.05) | 0.30<br>(0.06,1.59) | 0.43<br>(0.11,1.71) | 0.45<br>(0.08,2.56) | 0.93<br>(0.14,6.28) | <b>AV-eLS</b>       |                     |                      |                     |                     |                     |                     |               |  |
| 0.03<br>(0.01,0.15) | 0.17<br>(0.05,0.53) | 0.17<br>(0.05,0.58) | 0.20<br>(0.05,0.90) | 0.29<br>(0.09,0.93) | 0.30<br>(0.06,1.47) | 0.63<br>(0.11,3.65) | 0.68<br>(0.32,1.43) | <b>AV</b>           |                      |                     |                     |                     |                     |               |  |
| 0.03<br>(0.00,0.37) | 0.13<br>(0.01,1.55) | 0.13<br>(0.01,1.60) | 0.16<br>(0.01,2.21) | 0.22<br>(0.02,2.68) | 0.23<br>(0.02,3.11) | 0.48<br>(0.09,2.58) | 0.52<br>(0.05,5.29) | 0.77<br>(0.09,6.90) | <b>ACTH</b>          |                     |                     |                     |                     |               |  |
| 0.03<br>(0.00,0.15) | 0.13<br>(0.03,0.59) | 0.13<br>(0.03,0.63) | 0.15<br>(0.02,0.94) | 0.22<br>(0.05,1.03) | 0.23<br>(0.04,1.41) | 0.48<br>(0.07,3.47) | 0.51<br>(0.14,1.82) | 0.76<br>(0.27,2.10) | 0.98<br>(0.09,10.51) | <b>ENS</b>          |                     |                     |                     |               |  |
| 0.03<br>(0.01,0.12) | 0.13<br>(0.04,0.45) | 0.13<br>(0.03,0.49) | 0.15<br>(0.03,0.75) | 0.22<br>(0.06,0.79) | 0.23<br>(0.05,1.02) | 0.48<br>(0.09,2.63) | 0.52<br>(0.21,1.28) | 0.76<br>(0.45,1.28) | 0.99<br>(0.12,8.21)  | 1.01<br>(0.35,2.86) | <b>CTR</b>          |                     |                     |               |  |
| 0.02<br>(0.00,0.09) | 0.09<br>(0.02,0.35) | 0.09<br>(0.02,0.38) | 0.11<br>(0.02,0.57) | 0.16<br>(0.04,0.61) | 0.16<br>(0.03,0.91) | 0.34<br>(0.05,2.12) | 0.37<br>(0.13,1.03) | 0.54<br>(0.26,1.10) | 0.70<br>(0.07,6.76)  | 0.71<br>(0.21,2.46) | 0.71<br>(0.30,1.66) | <b>AV+AE</b>        |                     |               |  |
| 0.02<br>(0.00,0.12) | 0.08<br>(0.01,0.48) | 0.08<br>(0.01,0.51) | 0.09<br>(0.01,0.73) | 0.14<br>(0.02,0.83) | 0.14<br>(0.02,1.11) | 0.29<br>(0.06,1.37) | 0.32<br>(0.07,1.54) | 0.47<br>(0.12,1.88) | 0.61<br>(0.07,5.33)  | 0.62<br>(0.11,3.39) | 0.61<br>(0.15,2.54) | 0.87<br>(0.21,3.61) | <b>AE</b>           |               |  |
| 0.02<br>(0.00,0.08) | 0.07<br>(0.02,0.31) | 0.07<br>(0.02,0.33) | 0.09<br>(0.02,0.49) | 0.12<br>(0.03,0.54) | 0.13<br>(0.02,0.74) | 0.27<br>(0.04,1.84) | 0.29<br>(0.09,0.92) | 0.43<br>(0.18,1.03) | 0.56<br>(0.06,5.64)  | 0.57<br>(0.20,1.65) | 0.57<br>(0.23,1.39) | 0.80<br>(0.26,2.43) | 0.92<br>(0.18,4.64) | <b>AV-ENS</b> |  |





(D)

ENS

|                     |                     |                     |                    |                     |                    |                    |              |
|---------------------|---------------------|---------------------|--------------------|---------------------|--------------------|--------------------|--------------|
| 0.01 (-1.13,1.15)   | <b>AV+iLS</b>       |                     |                    |                     |                    |                    |              |
| -0.69 (-1.72,0.33)  | -0.70 (-2.08,0.67)  | <b>AV+AE-sgLS</b>   |                    |                     |                    |                    |              |
| -0.96 (-2.05,0.13)  | -0.97 (-2.40,0.45)  | -0.27 (-1.38,0.84)  | <b>AV+AE-iLS</b>   |                     |                    |                    |              |
| -1.02 (-1.85,-0.20) | -1.03 (-2.26,0.20)  | -0.33 (-1.18,0.52)  | -0.06 (-0.98,0.86) | <b>AV+AE-cLSC</b>   |                    |                    |              |
| -1.20 (-1.67,-0.73) | -1.21 (-2.24,-0.18) | -0.51 (-1.42,0.40)  | -0.24 (-1.22,0.75) | -0.18 (-0.85,0.50)  | <b>AV</b>          |                    |              |
| -1.23 (-1.89,-0.58) | -1.24 (-2.37,-0.12) | -0.54 (-1.41,0.33)  | -0.27 (-1.21,0.67) | -0.21 (-0.82,0.40)  | -0.03 (-0.48,0.42) | <b>AV+AE-pv</b>    |              |
| -1.66 (-2.38,-0.95) | -1.67 (-2.83,-0.51) | -0.97 (-1.71,-0.23) | -0.70 (-1.53,0.13) | -0.64 (-1.05,-0.23) | -0.46 (-1.00,0.07) | -0.43 (-0.89,0.02) | <b>AV+AE</b> |

(E)

**AV+iLS**

|                      |                      |                      |                      |                     |                     |                     |                     |                     |                      |                     |              |  |  |  |  |  |  |  |  |  |  |
|----------------------|----------------------|----------------------|----------------------|---------------------|---------------------|---------------------|---------------------|---------------------|----------------------|---------------------|--------------|--|--|--|--|--|--|--|--|--|--|
| -0.22 (-2.66, 2.22)  | <b>AV-sqL</b>        |                      |                      |                     |                     |                     |                     |                     |                      |                     |              |  |  |  |  |  |  |  |  |  |  |
| -0.75 (-2.66, 1.16)  | -0.53 (-2.75, 1.69)  | <b>ENS</b>           |                      |                     |                     |                     |                     |                     |                      |                     |              |  |  |  |  |  |  |  |  |  |  |
| -1.15 (-3.33, 1.02)  | -0.93 (-3.38, 1.51)  | -0.40 (-2.33, 1.52)  | <b>AV+AE-sgLS</b>    |                     |                     |                     |                     |                     |                      |                     |              |  |  |  |  |  |  |  |  |  |  |
| -1.48 (-3.65, 0.69)  | -1.26 (-3.70, 1.18)  | -0.73 (-2.65, 1.19)  | -0.33 (-2.50, 1.85)  | <b>EPI-LSE</b>      |                     |                     |                     |                     |                      |                     |              |  |  |  |  |  |  |  |  |  |  |
| -1.55 (-3.43, 0.33)  | -1.33 (-3.52, 0.86)  | -0.80 (-2.39, 0.79)  | -0.40 (-2.29, 1.50)  | -0.07 (-1.96, 1.82) | <b>AV-eLS</b>       |                     |                     |                     |                      |                     |              |  |  |  |  |  |  |  |  |  |  |
| -1.75 (-3.94, 0.43)  | -1.53 (-4.00, 0.93)  | -1.00 (-2.95, 0.94)  | -0.60 (-2.44, 1.24)  | -0.27 (-2.47, 1.92) | -0.20 (-2.12, 1.71) | <b>AV+AE-iLS</b>    |                     |                     |                      |                     |              |  |  |  |  |  |  |  |  |  |  |
| -1.85 (-3.73, 0.03)  | -1.63 (-3.82, 0.56)  | -1.10 (-2.68, 0.48)  | -0.70 (-2.58, 1.19)  | -0.37 (-1.45, 0.71) | -0.30 (-1.84, 1.24) | -0.10 (-2.00, 1.81) | <b>AV+SR</b>        |                     |                      |                     |              |  |  |  |  |  |  |  |  |  |  |
| -2.01 (-4.06, 0.03)  | -1.79 (-4.13, 0.54)  | -1.26 (-3.04, 0.51)  | -0.86 (-2.52, 0.80)  | -0.53 (-2.58, 1.51) | -0.46 (-2.21, 1.28) | -0.26 (-1.95, 1.43) | -0.16 (-1.90, 1.57) | <b>AV+AE-cLSC</b>   |                      |                     |              |  |  |  |  |  |  |  |  |  |  |
| -1.95 (-3.48, -0.42) | -1.73 (-3.63, 0.17)  | -1.20 (-2.35, -0.05) | -0.80 (-2.34, 0.74)  | -0.47 (-2.00, 1.06) | -0.40 (-1.50, 0.70) | -0.20 (-1.76, 1.37) | -0.10 (-1.19, 0.99) | 0.06 (-1.29, 1.42)  | <b>AV</b>            |                     |              |  |  |  |  |  |  |  |  |  |  |
| -1.99 (-3.78, -0.20) | -1.77 (-3.88, 0.34)  | -1.24 (-2.71, 0.23)  | -0.83 (-2.43, 0.76)  | -0.51 (-2.30, 1.28) | -0.44 (-1.87, 0.99) | -0.23 (-1.85, 1.38) | -0.14 (-1.56, 1.28) | 0.03 (-1.39, 1.44)  | -0.04 (-0.96, 0.88)  | <b>AV+AE-pv</b>     |              |  |  |  |  |  |  |  |  |  |  |
| -2.85 (-4.60, -1.11) | -2.63 (-4.72, -0.55) | -2.10 (-3.53, -0.68) | -1.70 (-2.99, -0.41) | -1.37 (-3.13, 0.38) | -1.30 (-2.69, 0.08) | -1.10 (-2.42, 0.22) | -1.00 (-2.38, 0.37) | -0.84 (-1.90, 0.22) | -0.90 (-1.75, -0.06) | -0.87 (-1.80, 0.07) | <b>AV+AE</b> |  |  |  |  |  |  |  |  |  |  |

Network league tables for all the PHN prevention strategies regarding (A) Incidence of PHN at 3 mo, (B) Incidence of PHN at 1 months, (C) Incidence of PHN at 6 mo, (D) Mean pain score at 3 mo and (E) Mean pain score at 1 mo. Estimates are presented as mean difference (95% confidence interval).

**Supplementary Table 2. Network diagnostic for Bayesian analysis.**

|                                                                       | Model  | Dbar  | pD    | DIC    | PSRF | I <sup>2</sup> (%) |
|-----------------------------------------------------------------------|--------|-------|-------|--------|------|--------------------|
| Incidence of postherpetic neuralgia at 3 mo after acute herpes zoster | Fixed  | 67.03 | 43.30 | 110.33 | 1.02 | 15%                |
|                                                                       | Random | 60.13 | 49.24 | 109.37 | 1.01 | 5%                 |
| Incidence of postherpetic neuralgia at 1 mo after acute herpes zoster | Fixed  | 55.44 | 34.05 | 89.49  | 1.02 | 24%                |
|                                                                       | Random | 46.50 | 39.81 | 86.31  | 1.01 | 10%                |
| Incidence of postherpetic neuralgia at 6 mo after acute herpes zoster | Fixed  | 44.53 | 33.25 | 77.78  | 1.02 | 15%                |
|                                                                       | Random | 39.86 | 36.22 | 76.09  | 1.01 | 5%                 |
| Pain score measured at 3 mo after acute herpes zoster                 | Fixed  | 16.78 | 15.32 | 32.10  | 1.00 | 11%                |
|                                                                       | Random | 15.82 | 15.63 | 31.45  | 1.00 | 5%                 |
| Pain score measured at 1 mo after acute herpes zoster                 | Fixed  | 32.74 | 23.95 | 56.69  | 1.01 | 24%                |
|                                                                       | Random | 25.98 | 25.64 | 51.62  | 1.01 | 4%                 |

Dbar: posterior mean of the deviance, pD: adequate number of parameters, DIC: deviance information criterion, sum of Dbar and pD, PSRF: Potential Scale Reduction Factor

**Supplementary Table 3. Results of network meta-regression analysis**

|                                                                       |        | 95% CI                | DIC_NMR | DIC_NM | I <sup>2</sup> _NMR (%) | I <sup>2</sup> _NM (%) |
|-----------------------------------------------------------------------|--------|-----------------------|---------|--------|-------------------------|------------------------|
| Incidence of postherpetic neuralgia at 3 mo after acute herpes zoster | ROB    | -1.38 (-0.16 to 2.89) | 106.95  | 109.37 | 3%                      | 5%                     |
|                                                                       | Age    | -0.23 (-1.34 to 0.87) | 110.52  |        | 5%                      |                        |
|                                                                       | Sex(M) | -0.07(-1.38 to 1.12)  | 110.38  |        | 5%                      |                        |
| Incidence of postherpetic neuralgia at 1 mo after acute herpes zoster | ROB    | 1.83 (-0.21 to 3.85)  | 82.10   | 86.31  | 6%                      | 10%                    |
|                                                                       | Age    | -0.58 (-1.99 to 0.69) | 85.86   |        | 8%                      |                        |
|                                                                       | Sex(M) | 0.55 (-1.19 to 2.26)  | 86.47   |        | 9%                      |                        |
| Incidence of postherpetic neuralgia at 6 mo after acute herpes zoster | ROB    | 2.19 (-0.30 to 4.79)  | 74.21   | 76.09  | 1%                      | 5%                     |
|                                                                       | Age    | -1.18 (-4.03 to 1.47) | 76.53   |        | 5%                      |                        |
|                                                                       | Sex(M) | 1.86 (-0.78 to 4.76)  | 76.01   |        | 4%                      |                        |
| Pain score measured at 3 mo after acute herpes zoster                 | ROB    | NP                    |         | 31.45  |                         | 5%                     |
|                                                                       | Age    | -0.28 (-4.52 to 3.32) | 31.74   |        | 6%                      |                        |
|                                                                       | Sex(M) | -0.43 (-2.83 to 1.76) | 31.70   |        | 5%                      |                        |
| Pain score measured at 1 mo after acute herpes zoster                 | ROB    | NP                    |         | 51.62  |                         | 4%                     |
|                                                                       | Age    | 1.68 (-1.25 to 4.80)  | 52.05   |        | 5%                      |                        |
|                                                                       | Sex(M) | 0.34 (-1.68 to 2.36)  | 52.19   |        | 4%                      |                        |

CI: credible interval, DIC: deviance information criterion, sum of Dbar and PD, M: male, NMR: network meta-regression, NM: network meta-analysis, NP: Did not perform meta-regression because all the studies included were graded as “some concern” or “high risk of bias”.



**Supplementary Fig. 1B.** The rankograms of the incidence of postherpetic neuralgia at 3 mo after acute herpes zoster

Profiles indicate the probabilities for treatments to assume any of the possible ranks. It is the probability that a given treatment ranks first, second, third, and so on, among all of the treatments evaluated in the NMA.

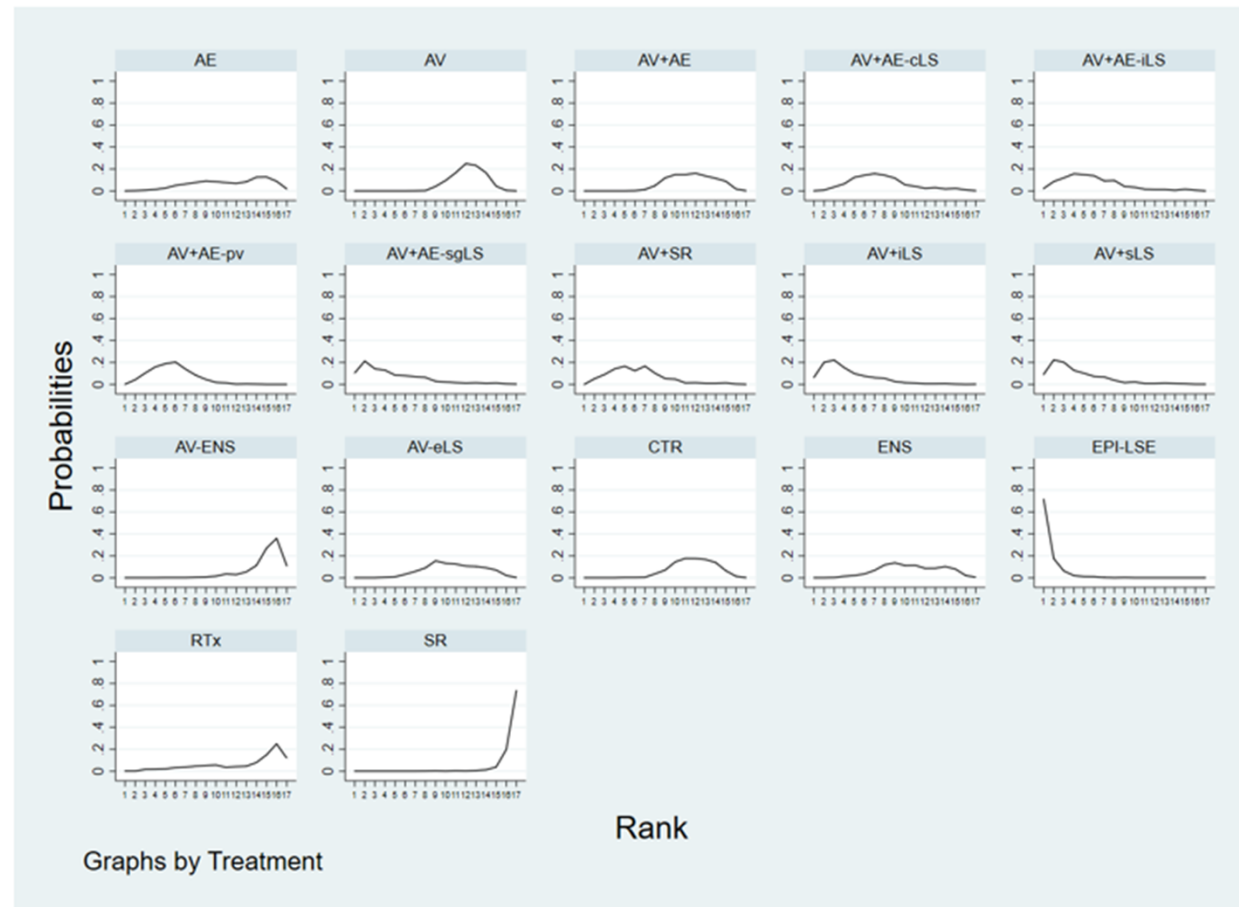

**Supplementary Fig. 1C** The cumulative ranking curves of the incidence of postherpetic neuralgia at 3 mo after acute herpes zoster

The profile indicates the sum of the probabilities from those ranked first, second, third, and so on. A higher cumulative ranking curve (surface of under cumulative ranking curve [SUCRA]) value is regarded as an improved result for an individual's intervention. When ranking treatments, the closer the SUCRA value is to 100%, the higher the treatment ranking is relative to all other treatments.

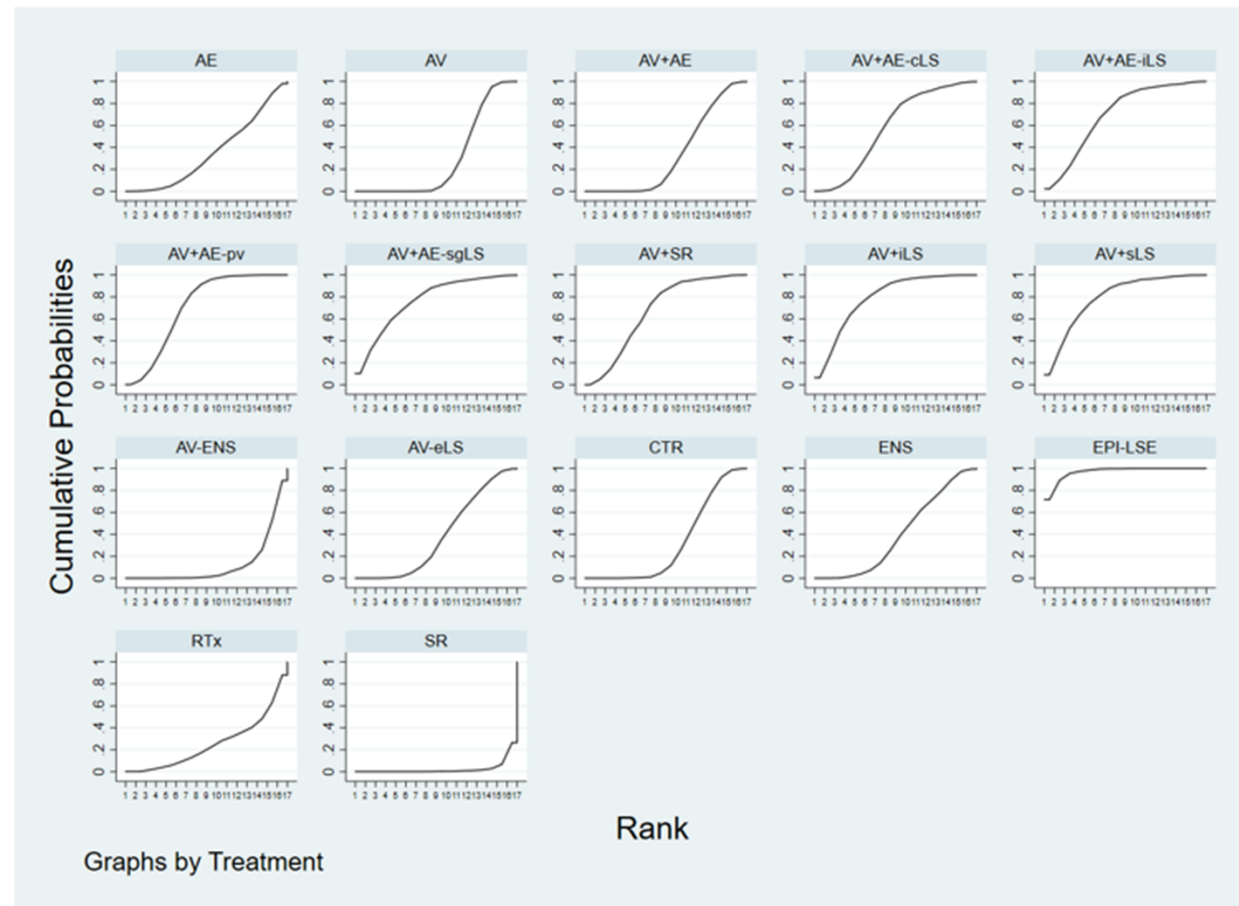



**Supplementary Fig. 1D.** Trace and density plot in fixed model for the incidence of post-herpetic neuralgia at 3 mo after acute herpes zoster

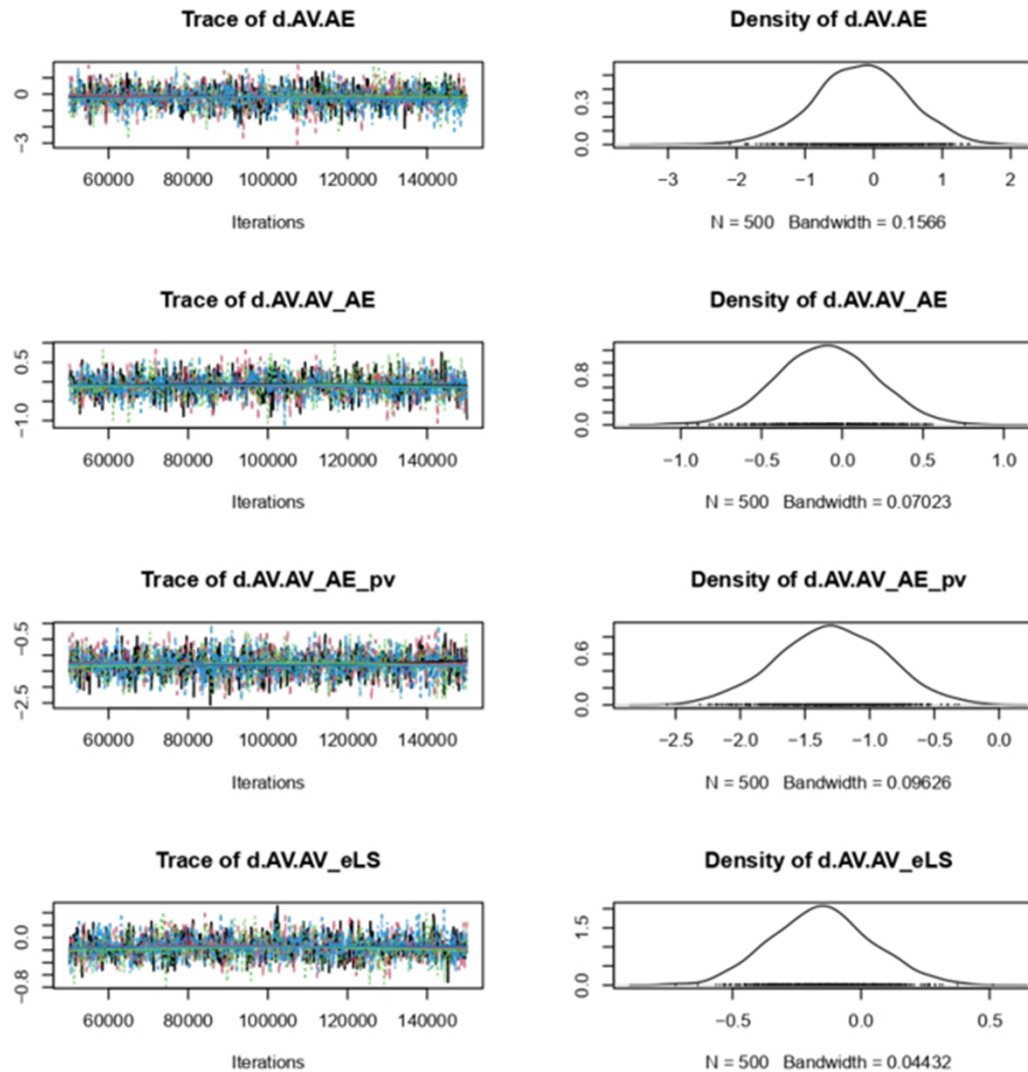

**Trace of d.AV.AV\_ENS**

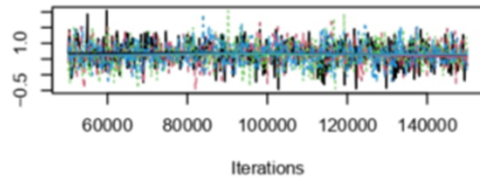

**Density of d.AV.AV\_ENS**

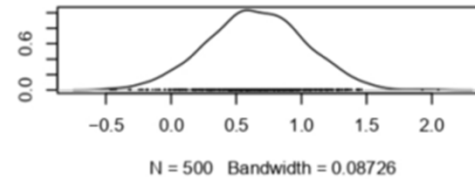

**Trace of d.AV.AV\_iLS**

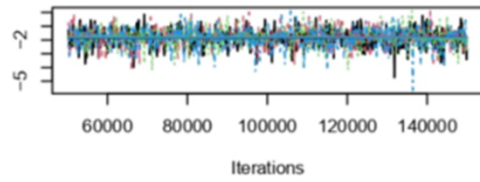

**Density of d.AV.AV\_iLS**

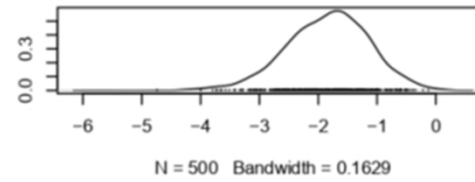

**Trace of d.AV.AV\_sLS**

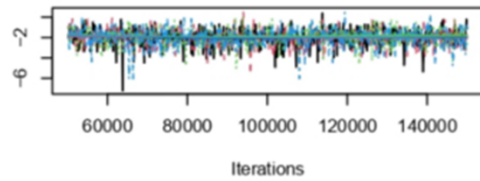

**Density of d.AV.AV\_sLS**

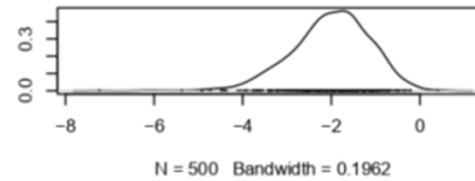

**Trace of d.AV.AV\_SR**

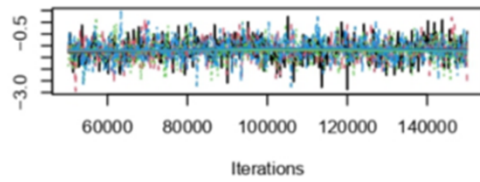

**Density of d.AV.AV\_SR**

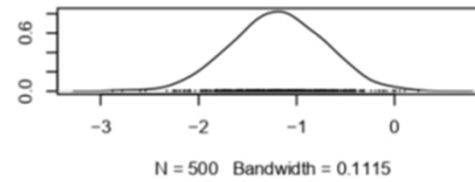

**Trace of d.AV.CTR**

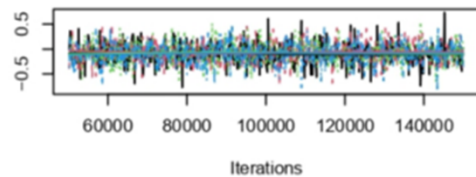

**Density of d.AV.CTR**

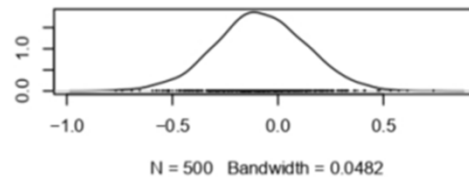

**Trace of d.AV.ENS**

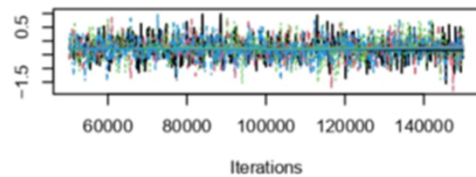

**Density of d.AV.ENS**

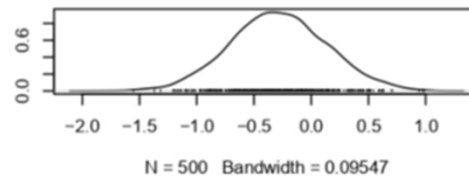

**Trace of d.AV.RTx**

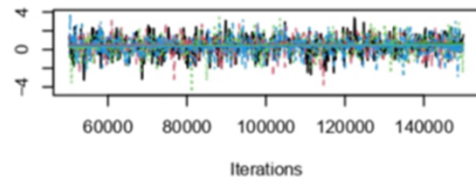

**Density of d.AV.RTx**

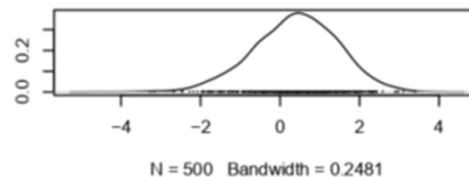

**Trace of d.AV.SR**

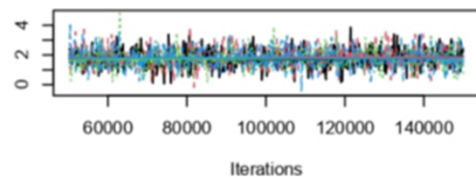

**Density of d.AV.SR**

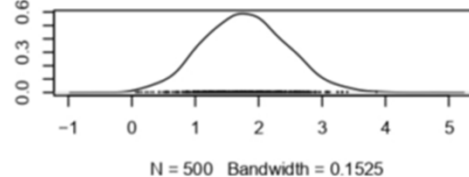

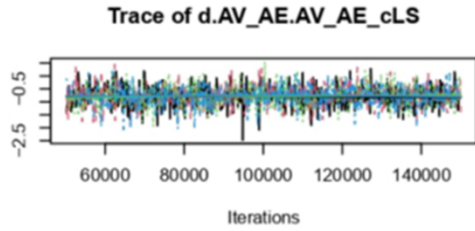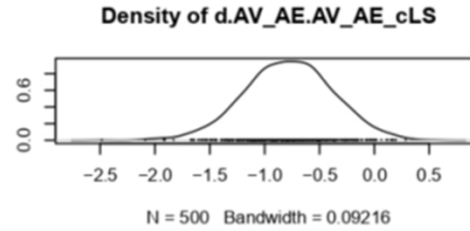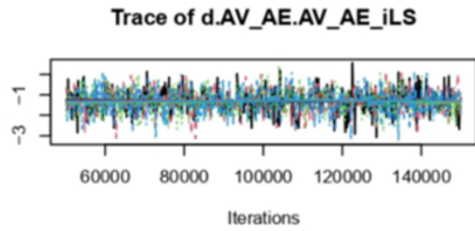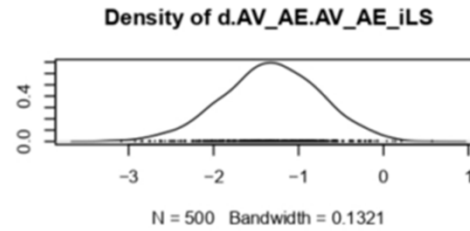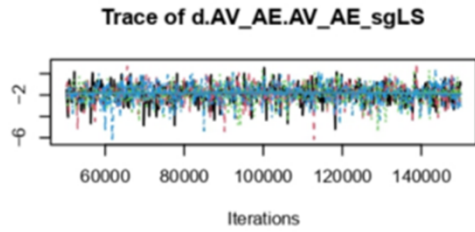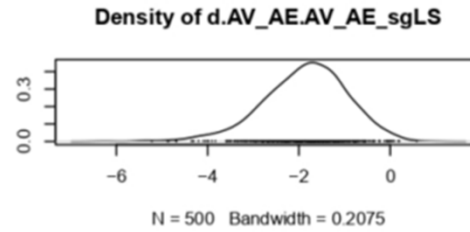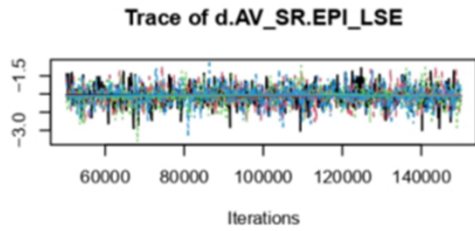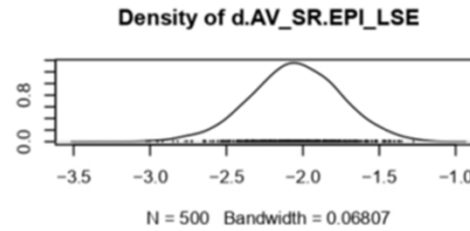

**Supplementary Fig. 1E.** trace and density plot in random model for the incidence of postherpetic neuralgia at 3 mo after acute herpes zoster

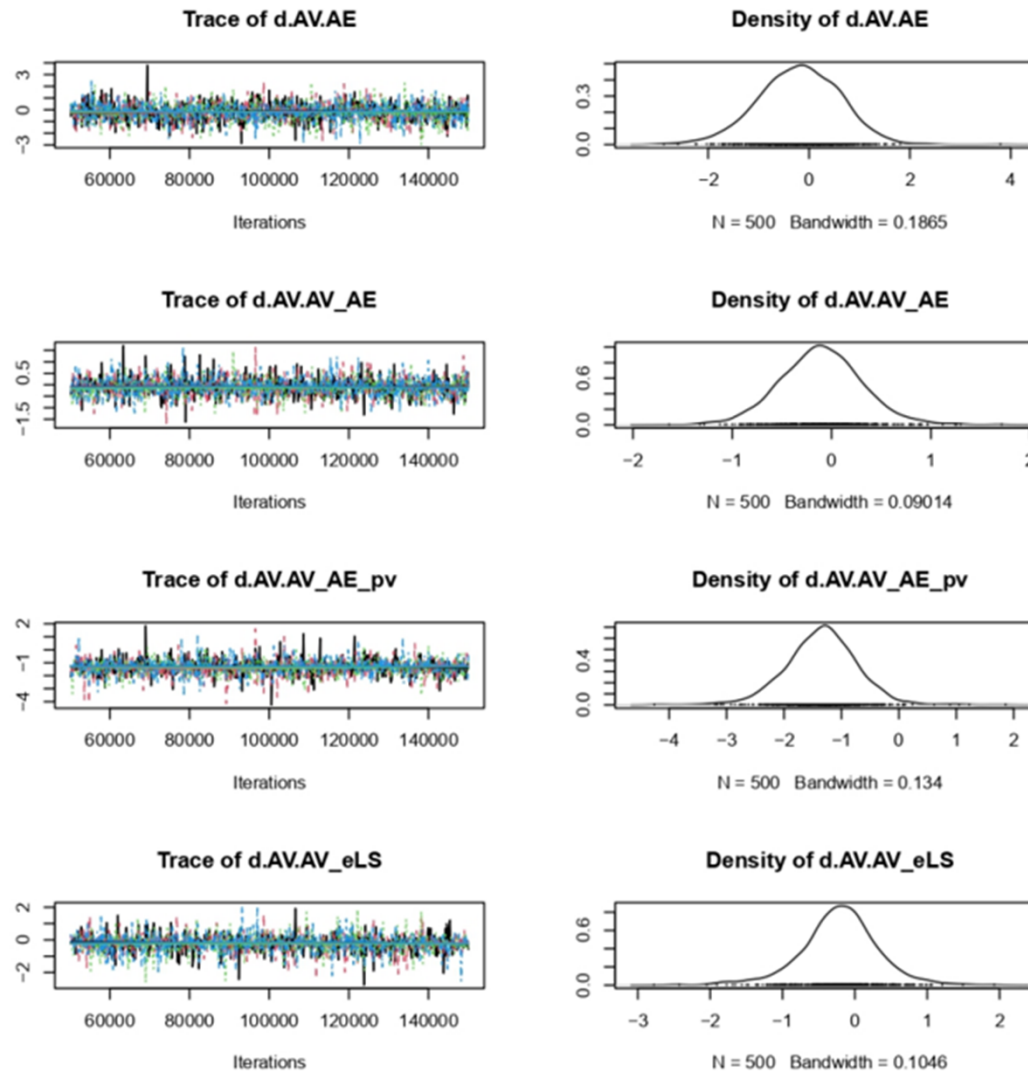

**Trace of d.AV.AV\_ENS**

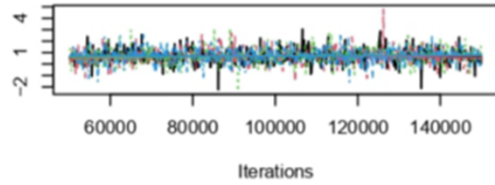

**Density of d.AV.AV\_ENS**

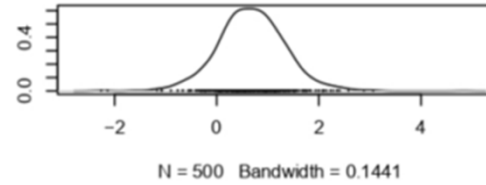

**Trace of d.AV.AV\_iLS**

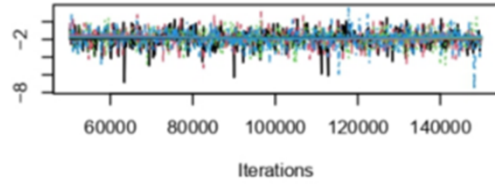

**Density of d.AV.AV\_iLS**

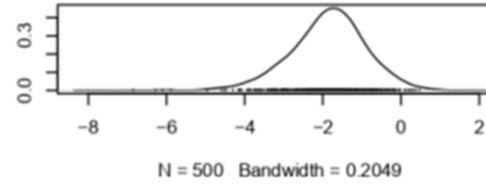

**Trace of d.AV.AV\_sLS**

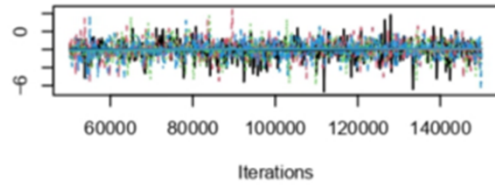

**Density of d.AV.AV\_sLS**

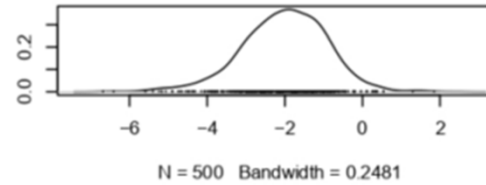

**Trace of d.AV.AV\_SR**

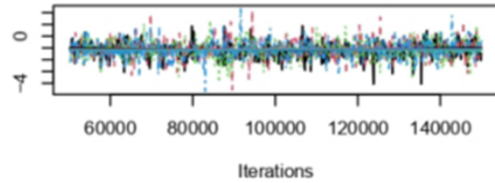

**Density of d.AV.AV\_SR**

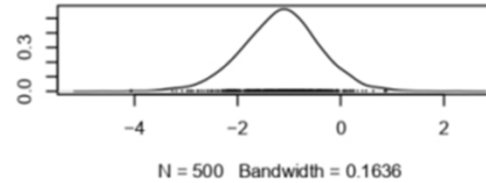

**Trace of d.AV.CTR**

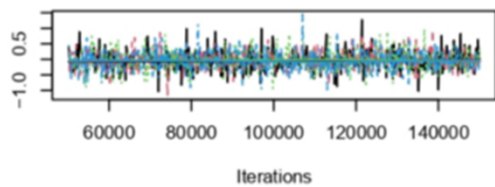

**Density of d.AV.CTR**

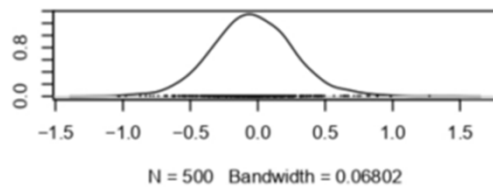

**Trace of d.AV.ENS**

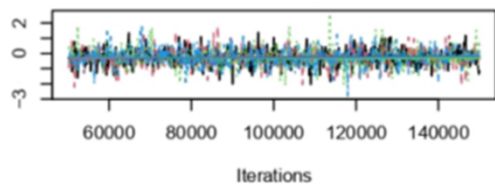

**Density of d.AV.ENS**

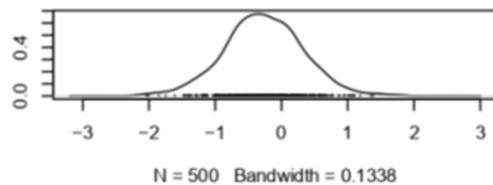

**Trace of d.AV.RTx**

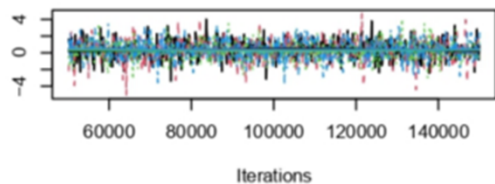

**Density of d.AV.RTx**

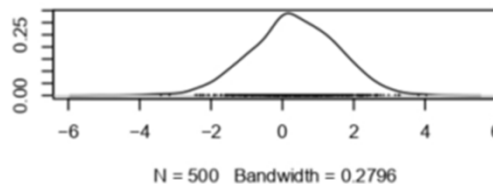

**Trace of d.AV.SR**

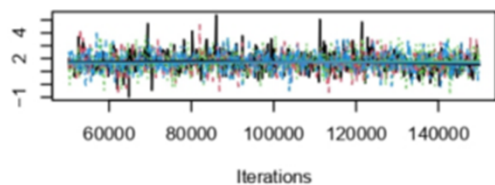

**Density of d.AV.SR**

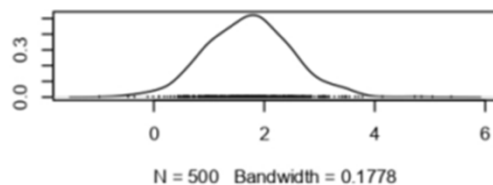

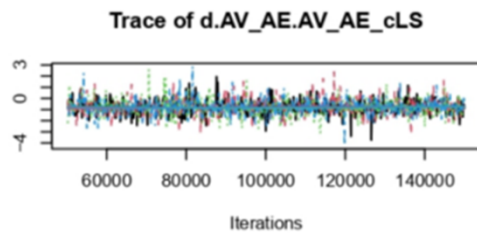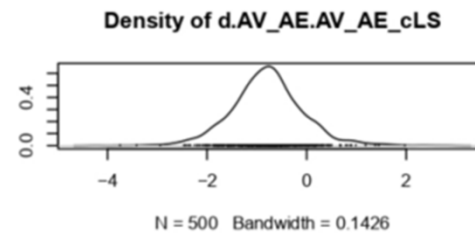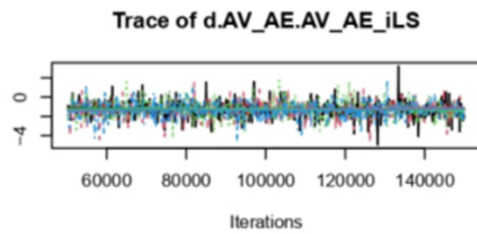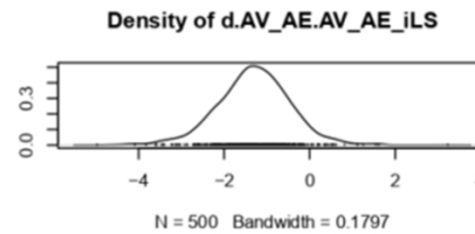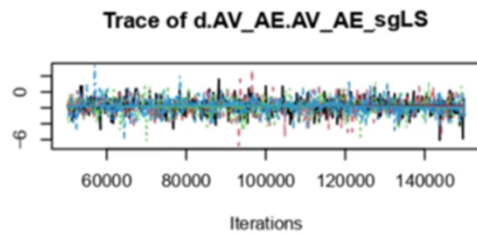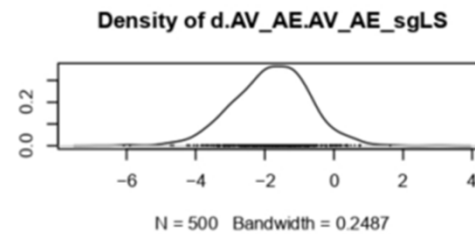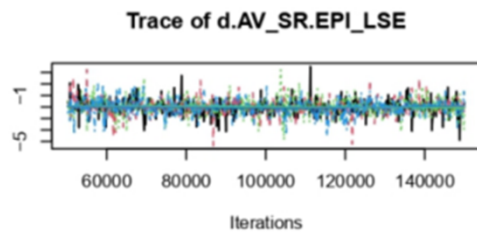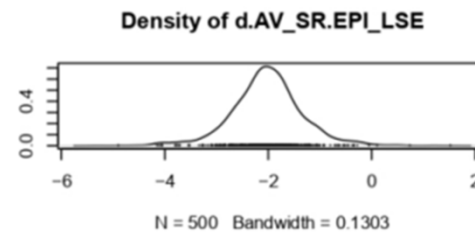



**Trace of sd.d**

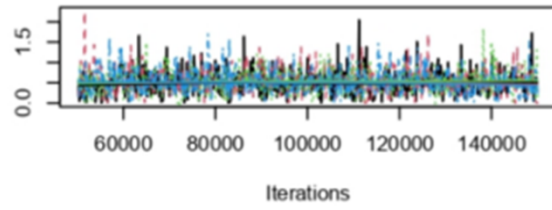

**Density of sd.d**

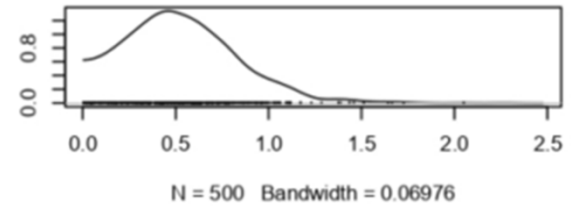

**Supplementary Fig 1E.** Gelman-Rubin-Brooks in fixed model for the incidence of postherpetic neuralgia at 3 mo after acute herpes zoster

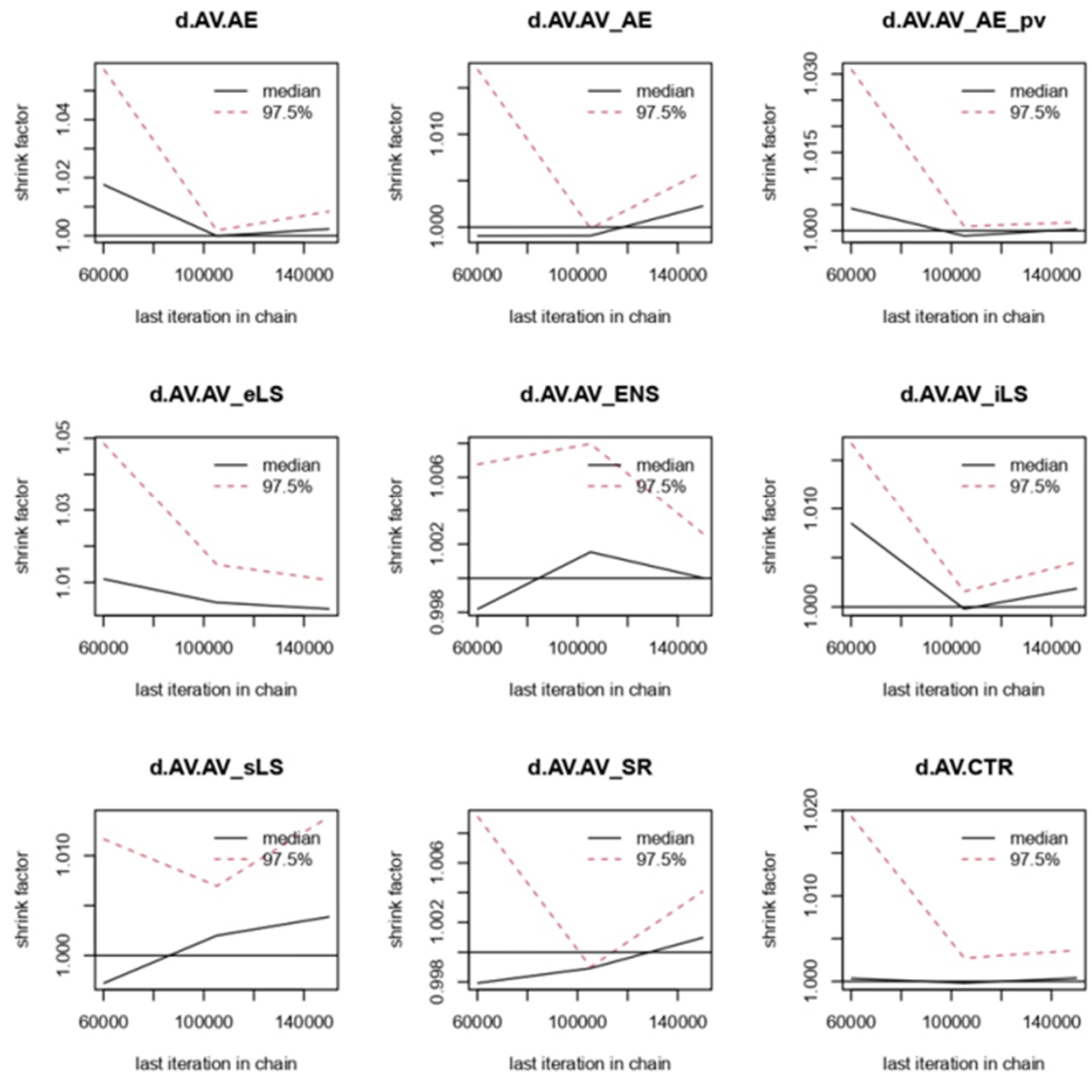

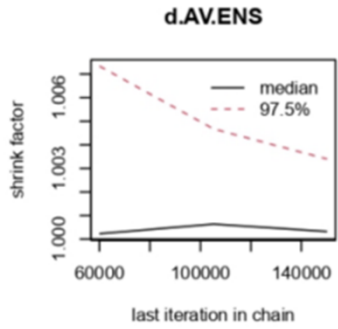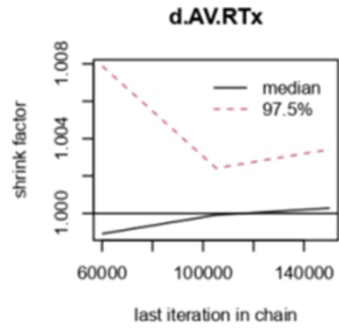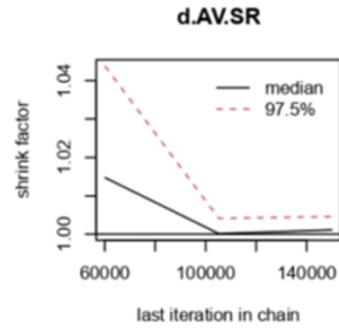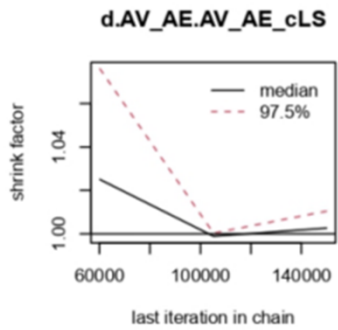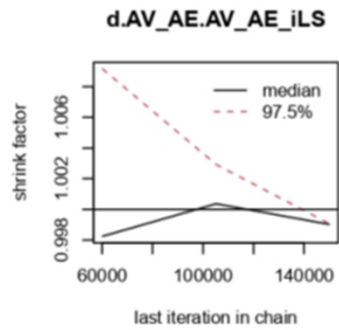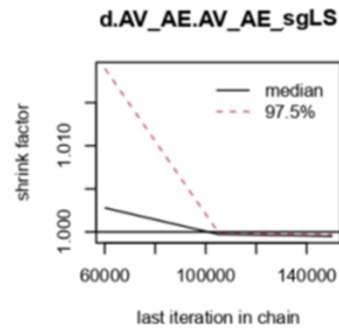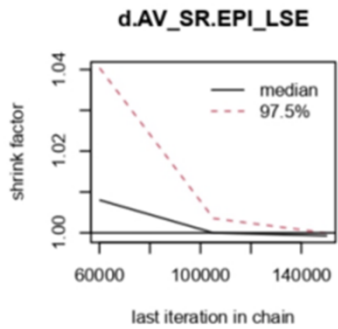

**Supplementary Fig. 1G.** Gelman-Rubin-Brooks in random model for the incidence of postherpetic neuralgia at 3 mo after acute herpes zoster

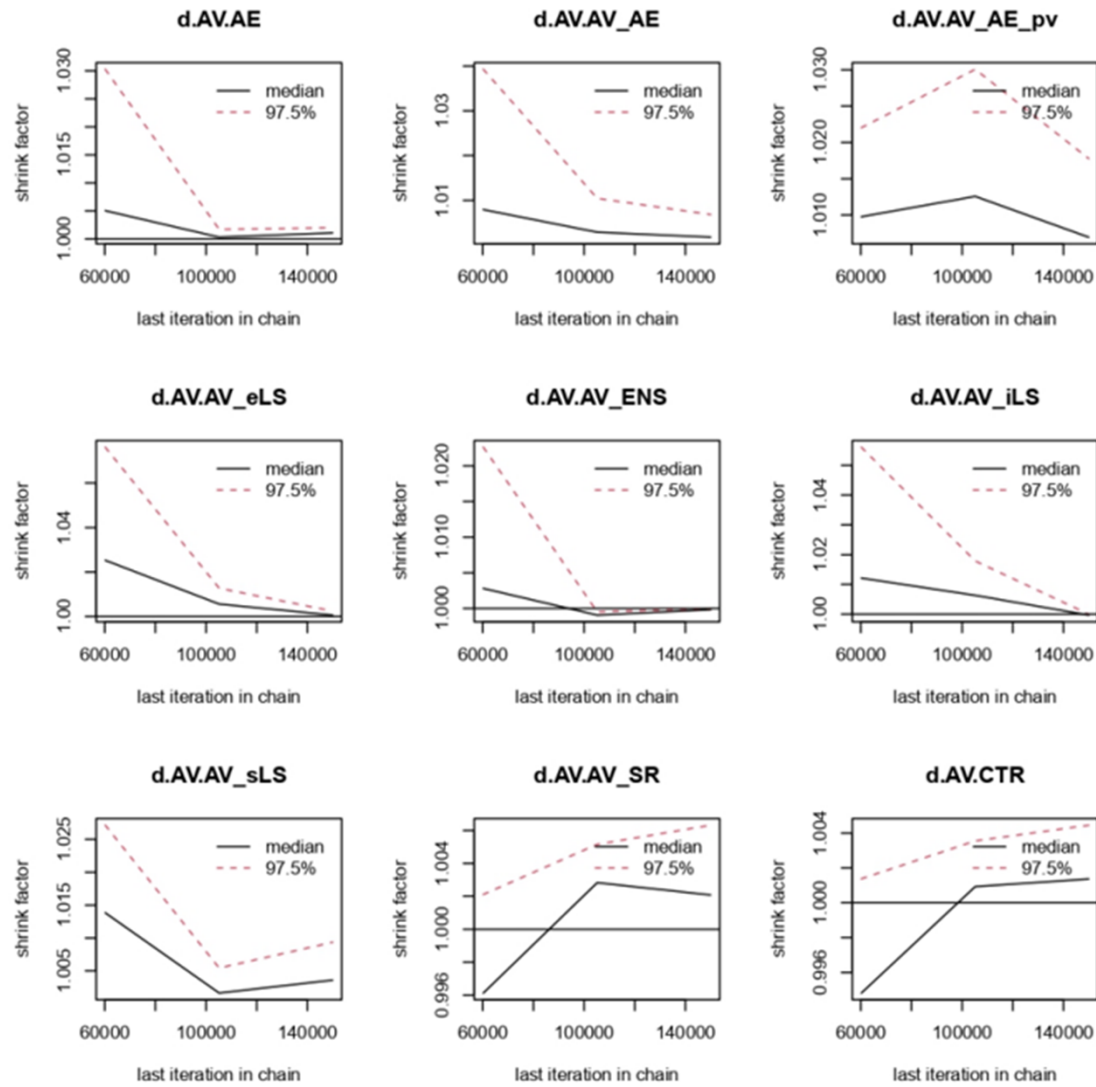

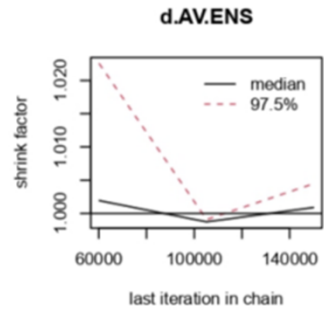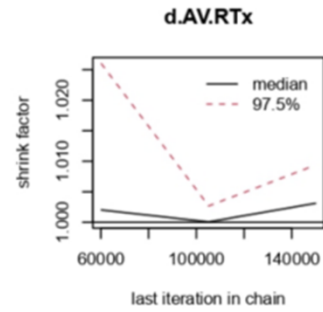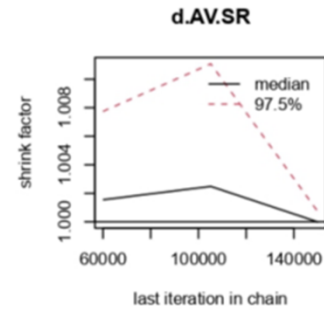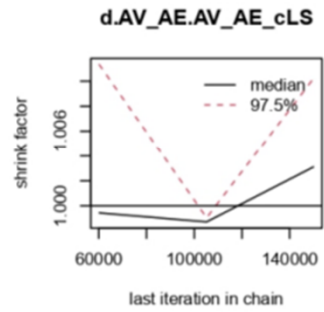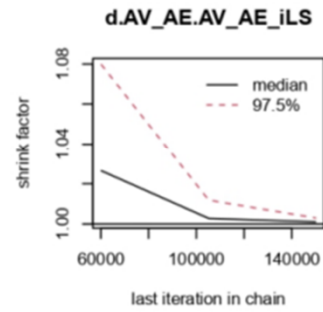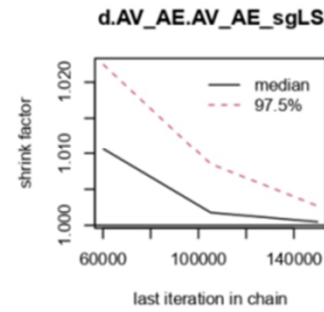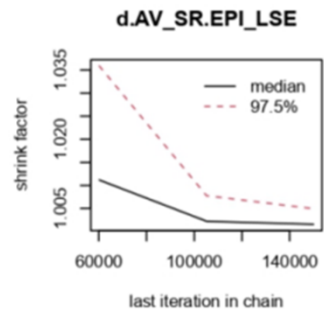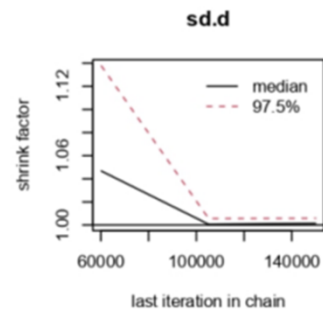



**Supplementary Fig. 2B.** The rankograms of the incidence of postherpetic neuralgia at 1 mo after acute herpes zoster

Profiles indicate the probabilities for treatments to assume any of the possible ranks. It is the probability that a given treatment ranks first, second, third, and so on, among all of the treatments evaluated in the NMA.

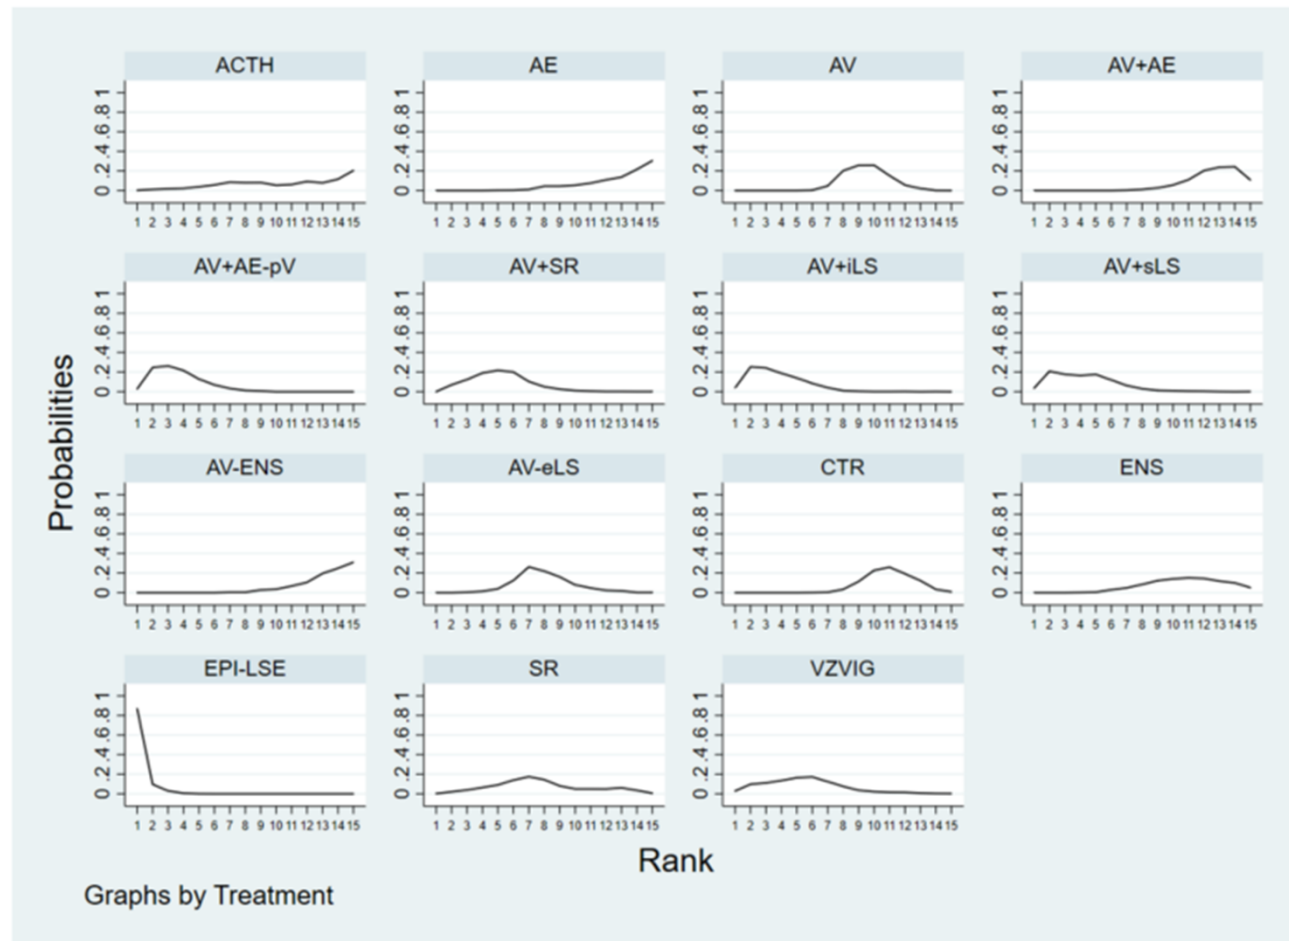

**Supplementary Fig. 2C.** The cumulative ranking curves of the incidence of postherpetic neuralgia at 1 mo after acute herpes zoster

The profile indicates the sum of the probabilities from those ranked first, second, third, and so on. A higher cumulative ranking curve (surface of under cumulative ranking curve [SUCRA]) value is regarded as an improved result for an individual's intervention. When ranking treatments, the closer the SUCRA value is to 100%, the higher the treatment ranking is relative to all other treatments.

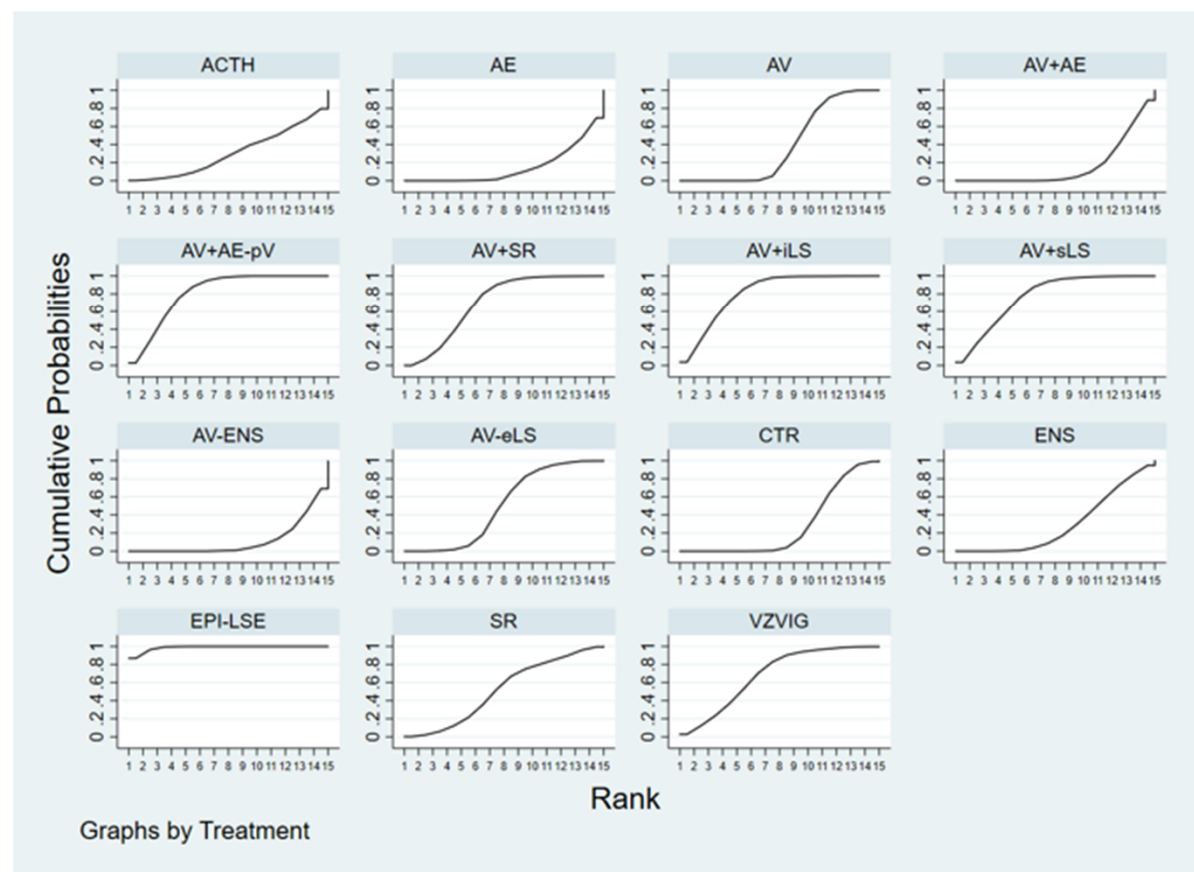



**Supplementary Fig. 2D.** Trace and density plot in fixed model for the incidence of postherpetic neuralgia at 1 mo after acute herpes zoster

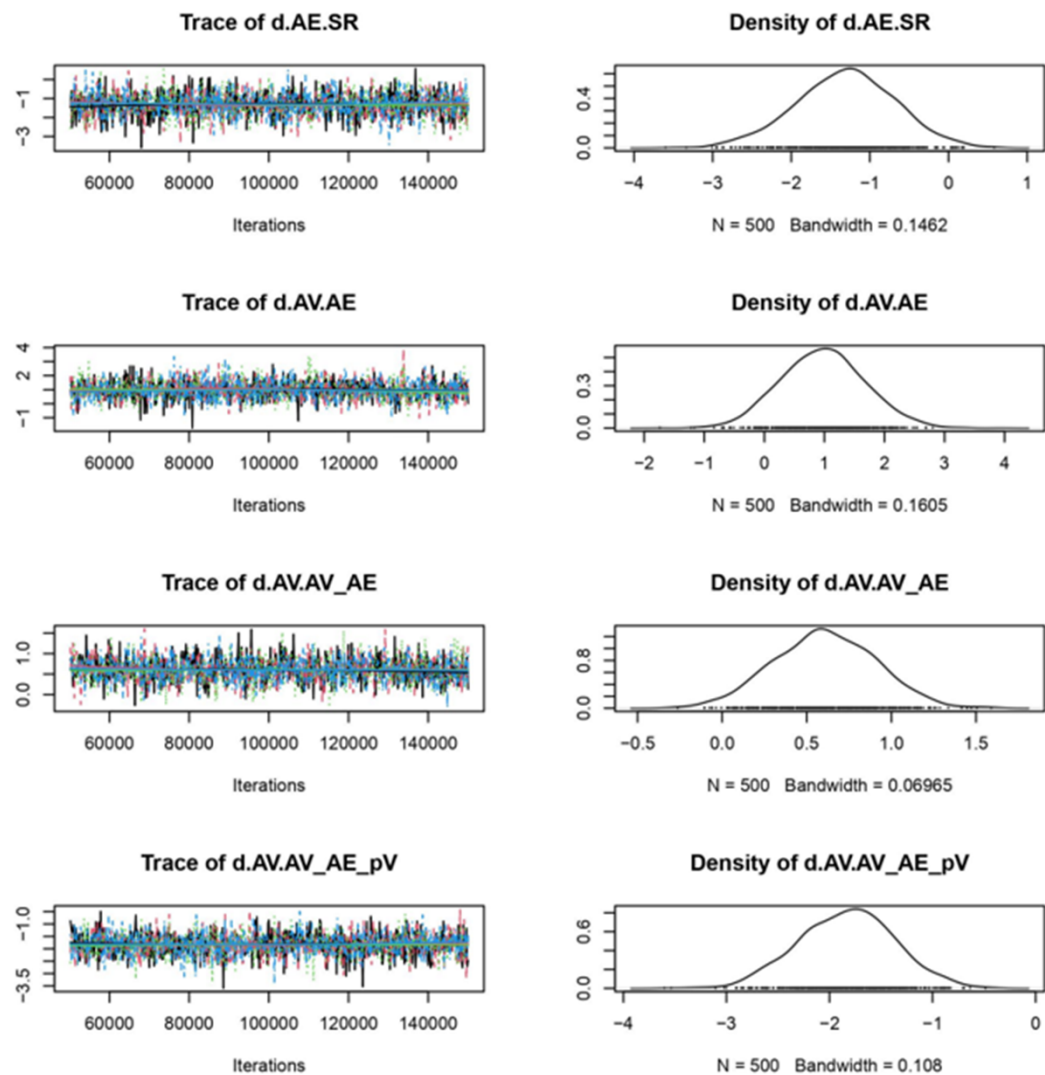

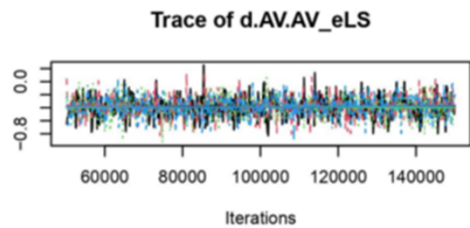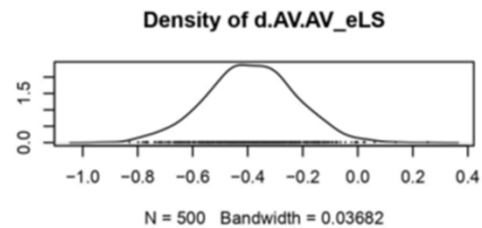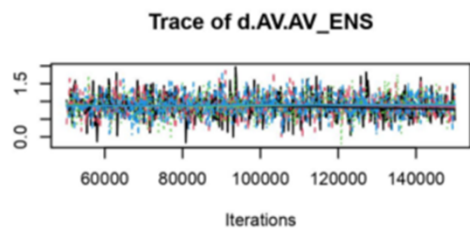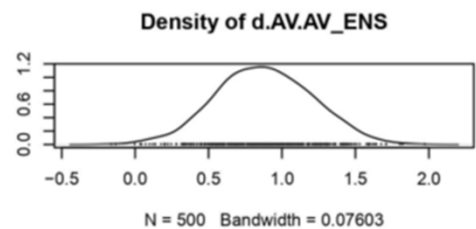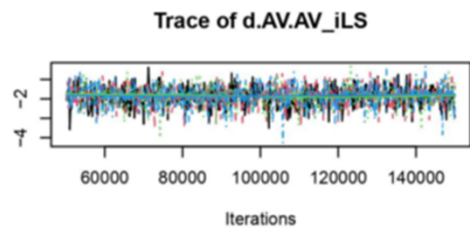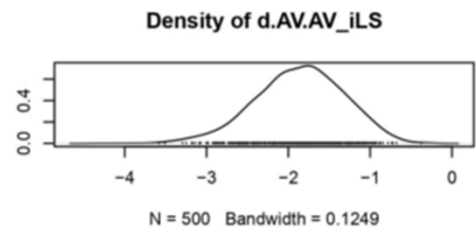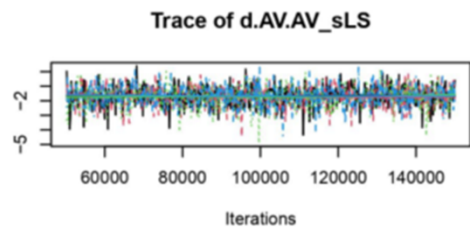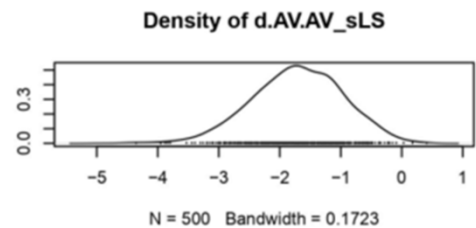

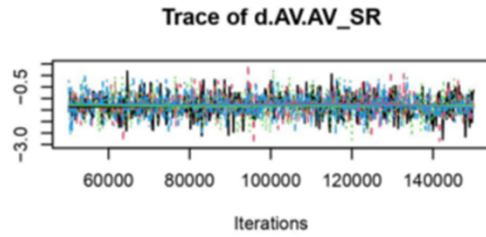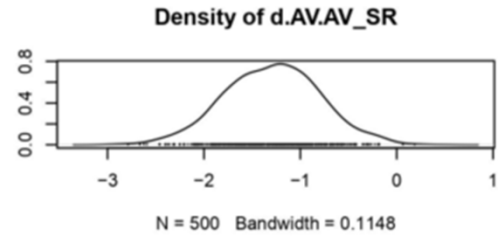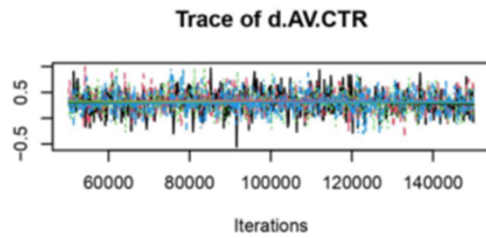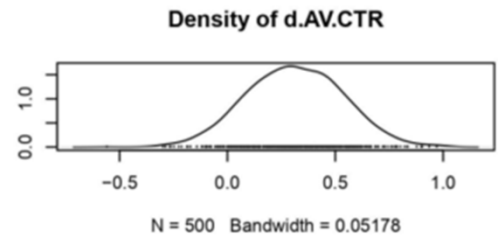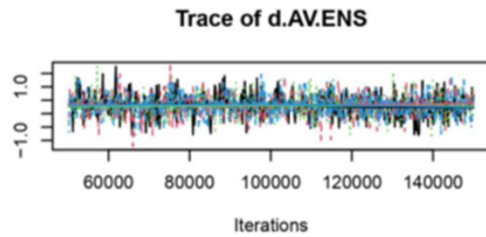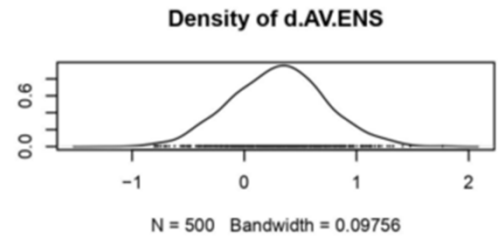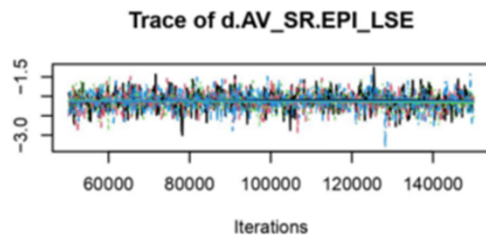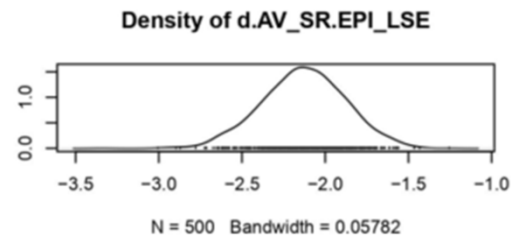

**Trace of d.CTR.ACTH**

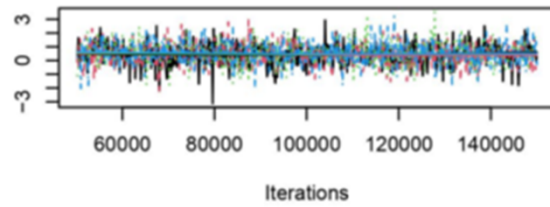

**Density of d.CTR.ACTH**

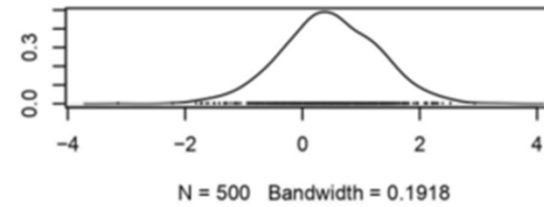

**Trace of d.CTR.VZVIG**

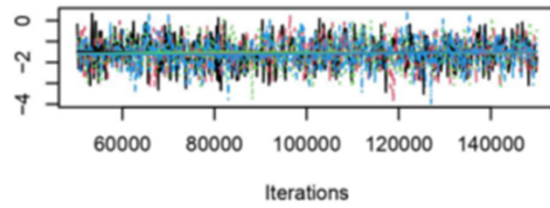

**Density of d.CTR.VZVIG**

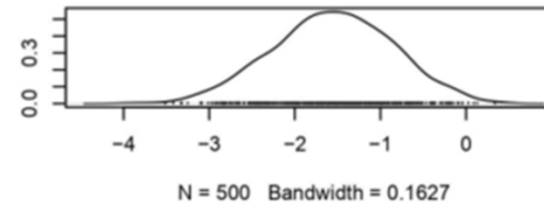

**Supplementary Fig. 2E.** trace and density plot in random model for the incidence of postherpetic neuralgia at 1 mo after acute herpes zoster

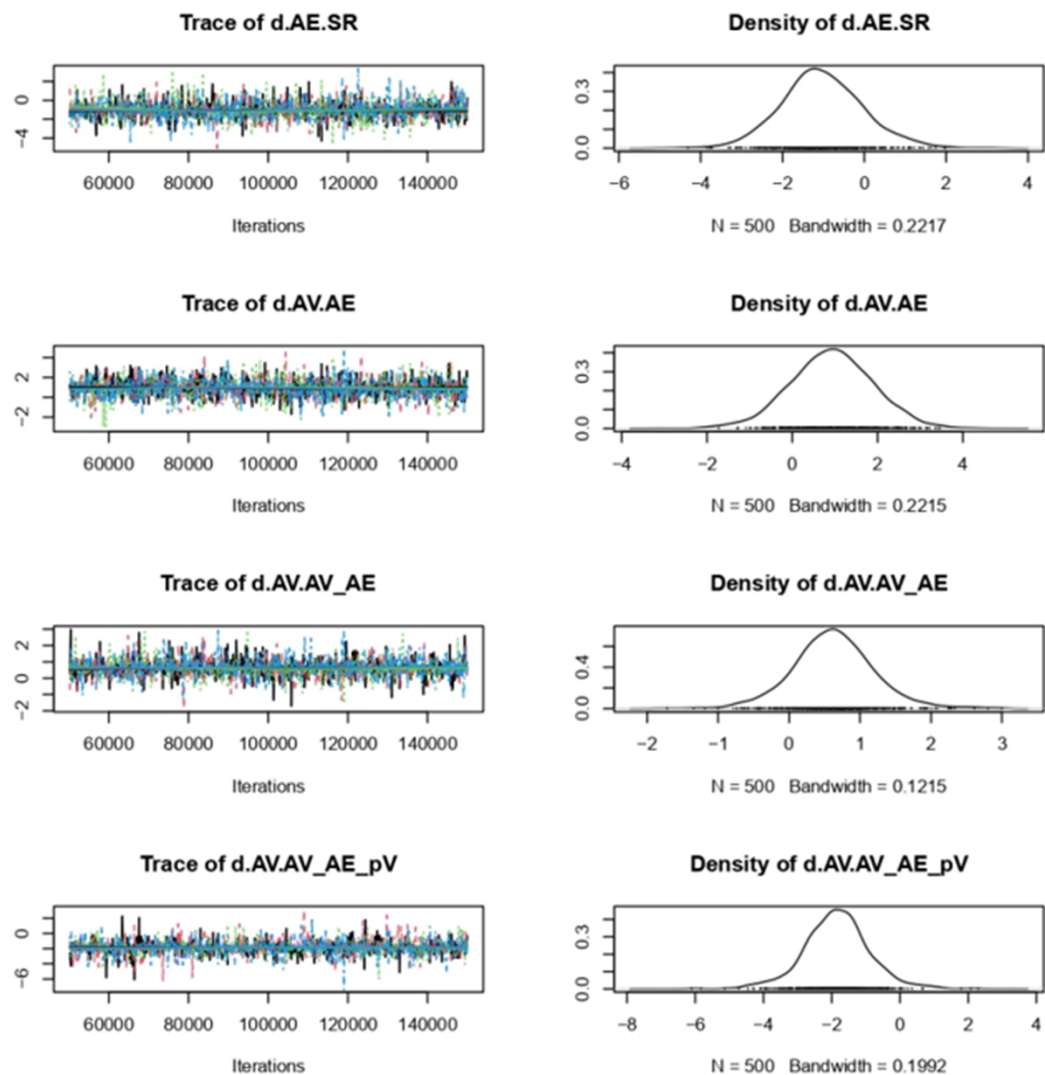

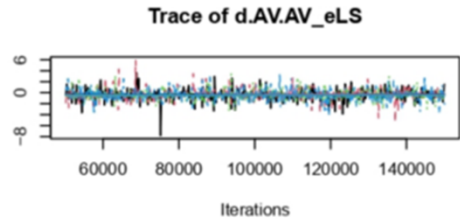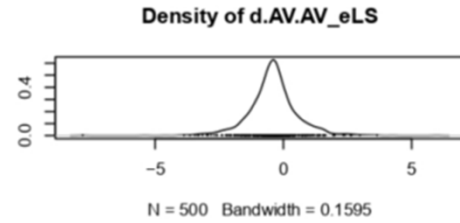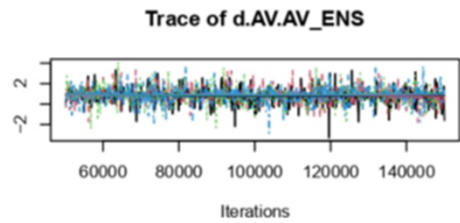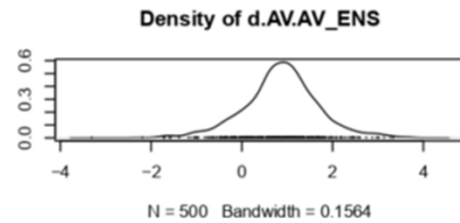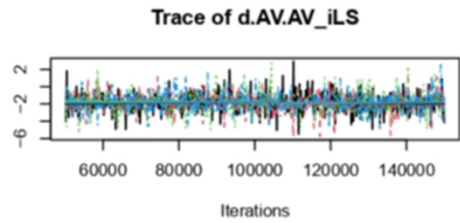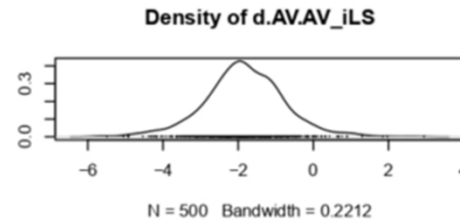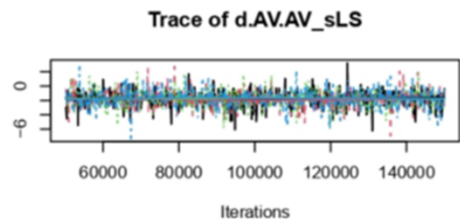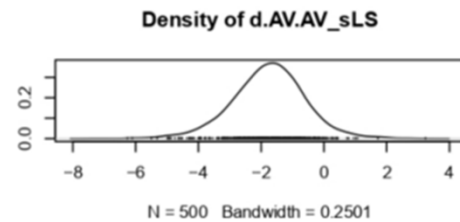

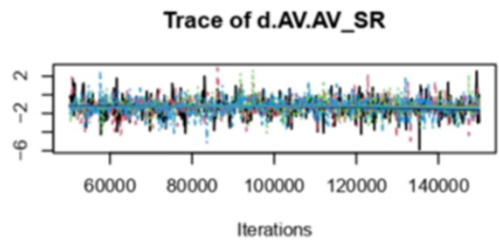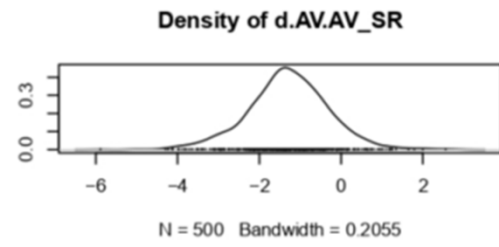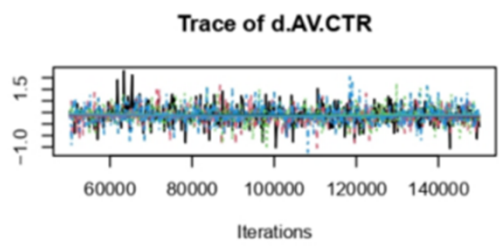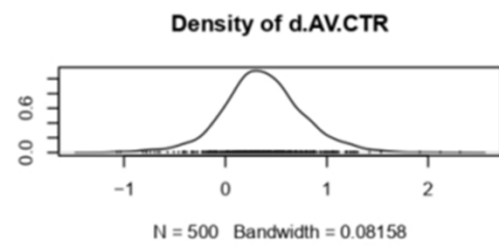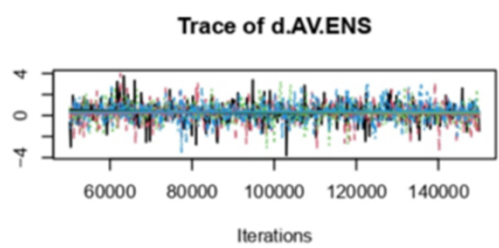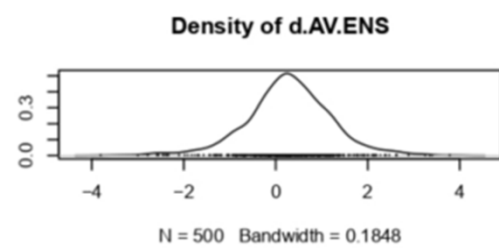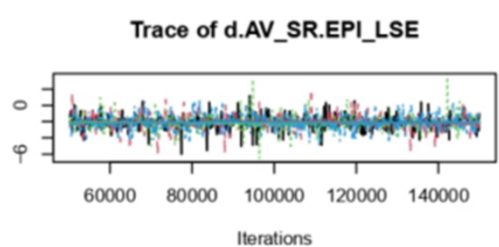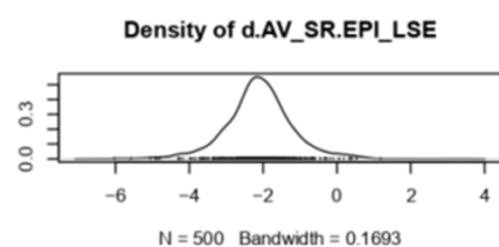

**Trace of d.CTR.ACTH**

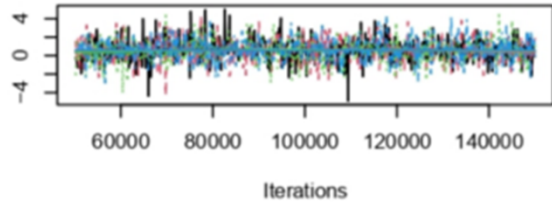

**Density of d.CTR.ACTH**

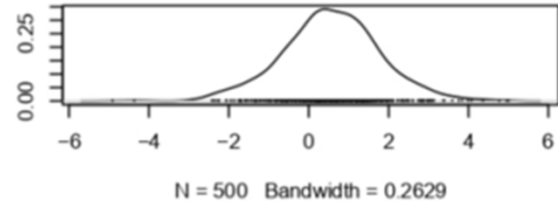

**Trace of d.CTR.VZVIG**

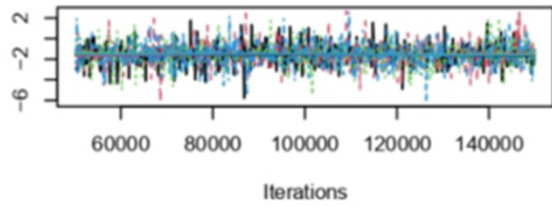

**Density of d.CTR.VZVIG**

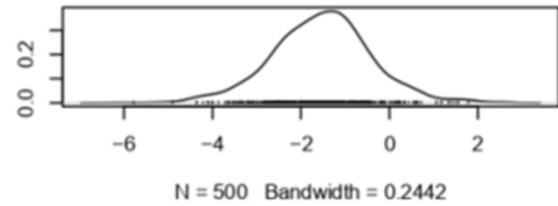

**Trace of sd.d**

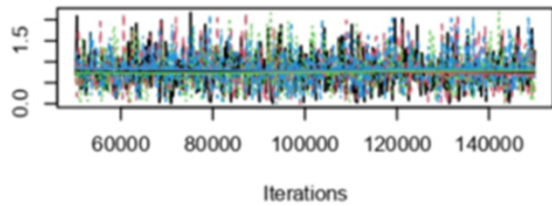

**Density of sd.d**

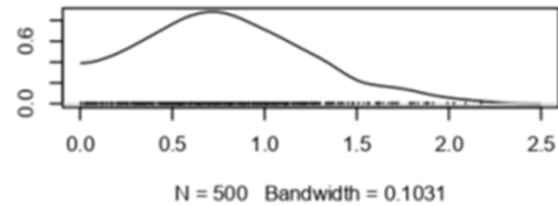



**Supplementary Fig. 2F.** Gelman-Rubin-Brooks in fixed model for the incidence of postherpetic neuralgia at 1 mo after acute herpes zoster

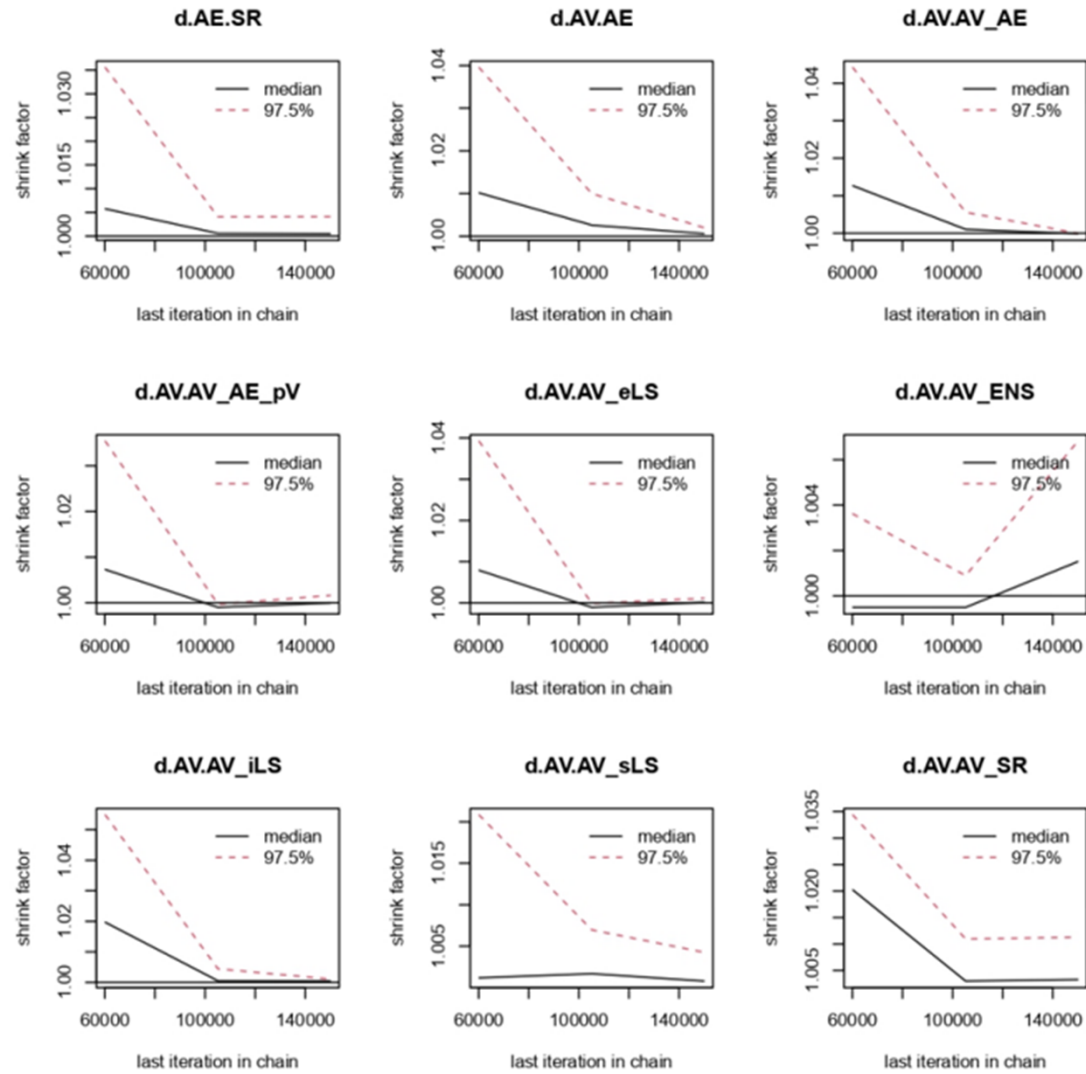

**d.AV.CTR**

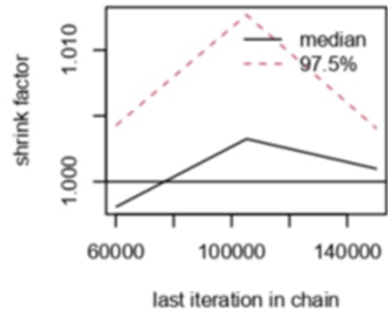

**d.AV.ENS**

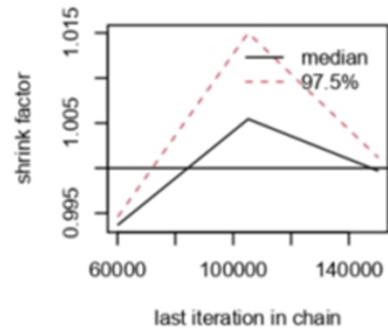

**d.AV\_SR.EPI\_LSE**

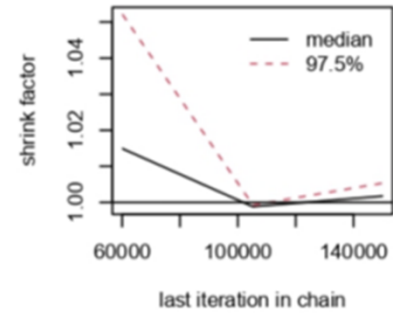

**d.CTR.ACTH**

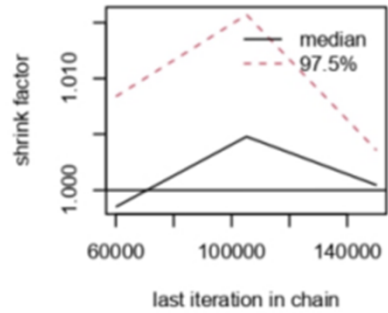

**d.CTR.VZVIG**

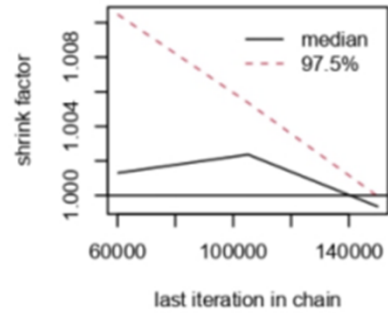

**Supplementary Fig. 2G.** Gelman-Rubin-Brooks in random model for the incidence of postherpetic neuralgia at 1 mo after acute herpes zoster

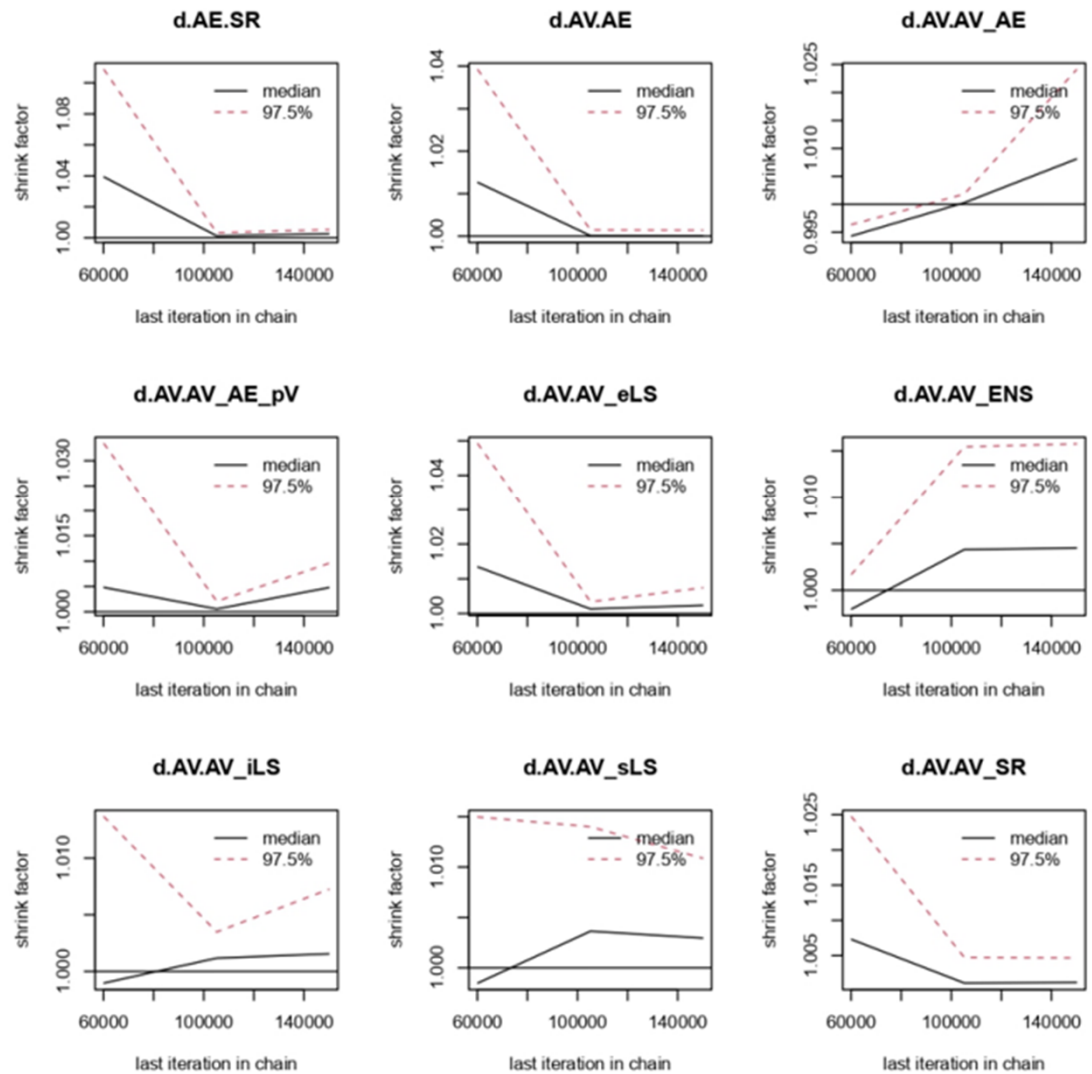

**d.AV.CTR**

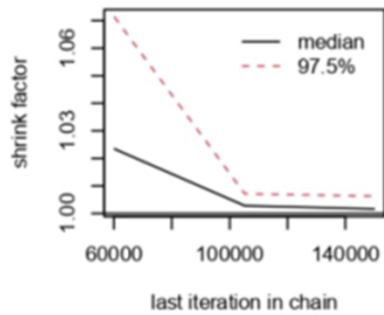

**d.AV.ENS**

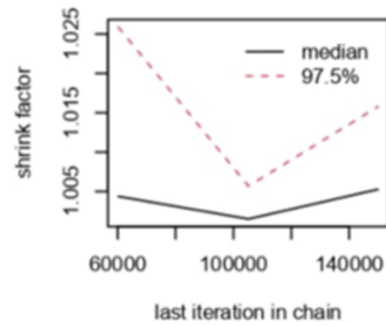

**d.AV\_SR.EPI\_LSE**

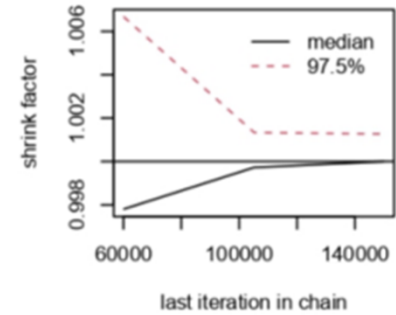

**d.CTR.ACTH**

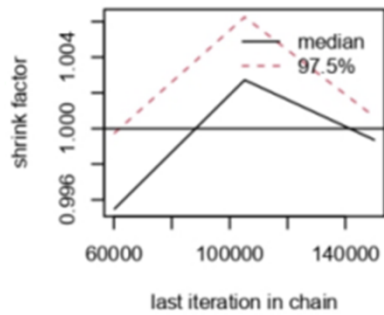

**d.CTR.VZVIG**

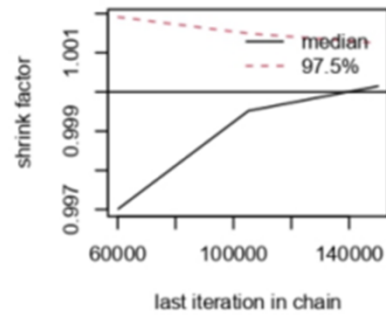

**sd.d**

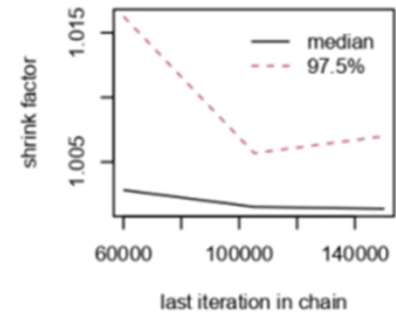



**Supplementary Fig. 3B.** The rankograms of the incidence of postherpetic neuralgia at 6 mo after acute herpes zoster

Profiles indicate the probabilities for treatments to assume any of the possible ranks. It is the probability that a given treatment ranks first, second, third, and so on, among all of the treatments evaluated in the NMA.

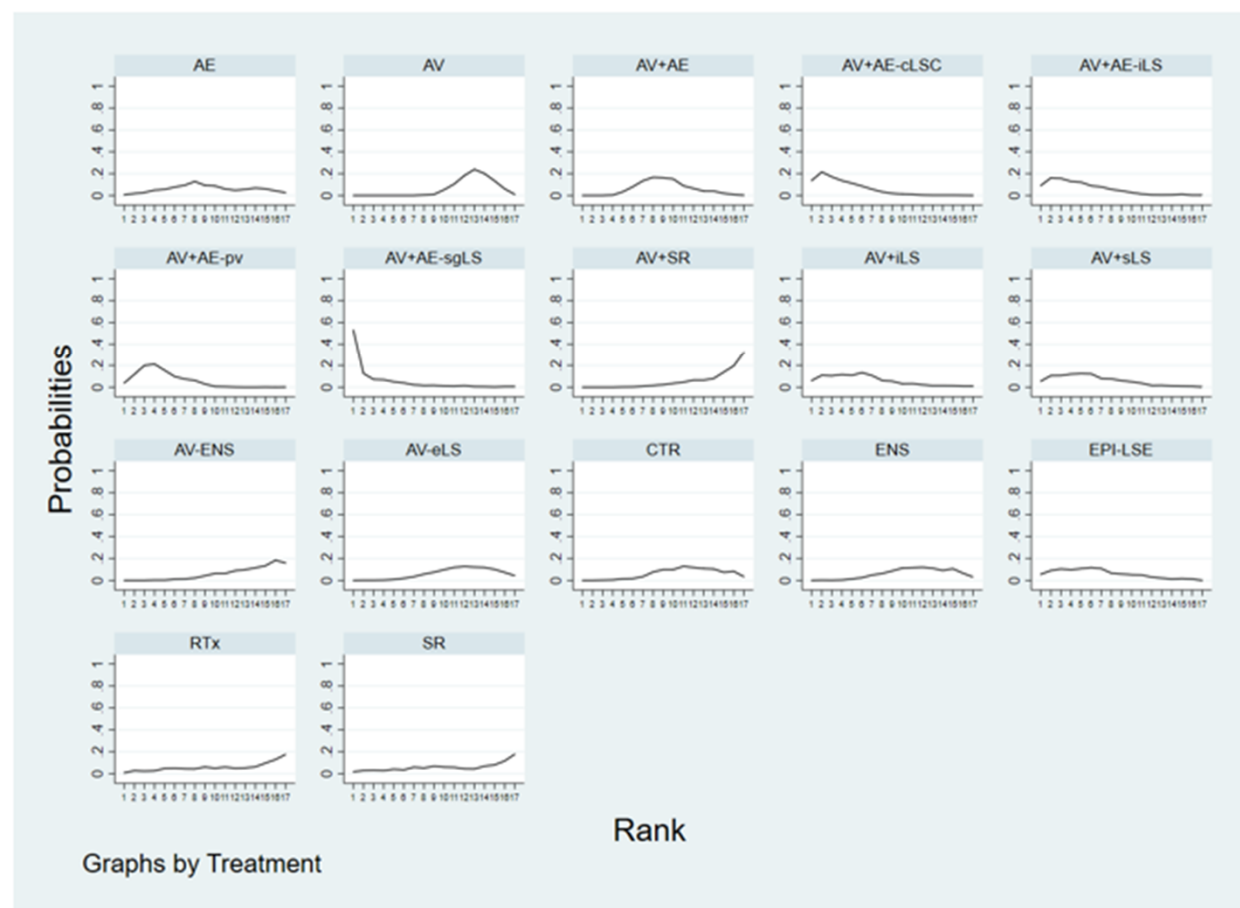

**Supplementary Fig. 3C.** The cumulative ranking curves of the incidence of postherpetic neuralgia at 6 mo after acute herpes zoster

The profile indicates the sum of the probabilities from those ranked first, second, third, and so on. A higher cumulative ranking curve (surface of under cumulative ranking curve [SUCRA]) value is regarded as an improved result for an individual's intervention. When ranking treatments, the closer the SUCRA value is to 100%, the higher the treatment ranking is relative to all other treatments.

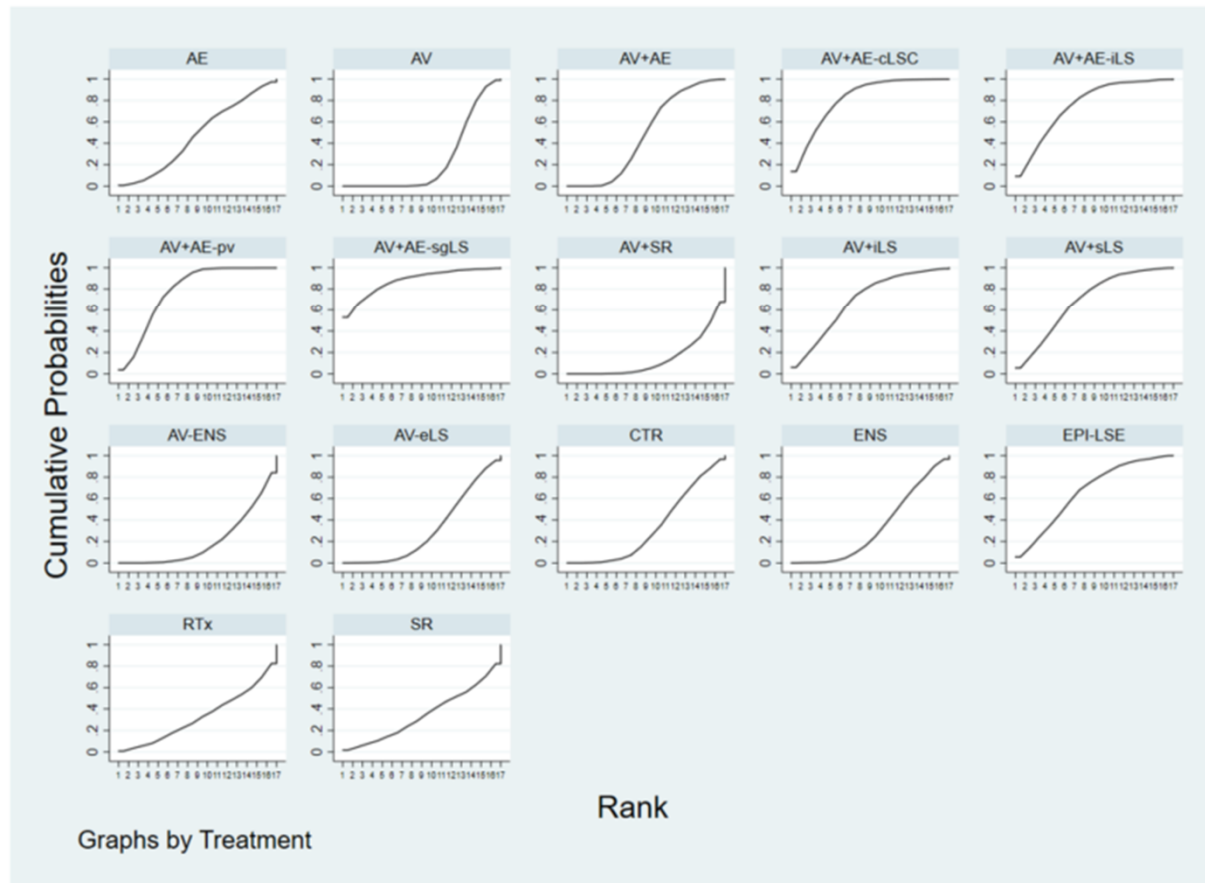

**Supplementary Fig. 3D.** Trace and density plot in fixed model for the incidence of postherpetic neuralgia at 6 month after acute herpes zoster

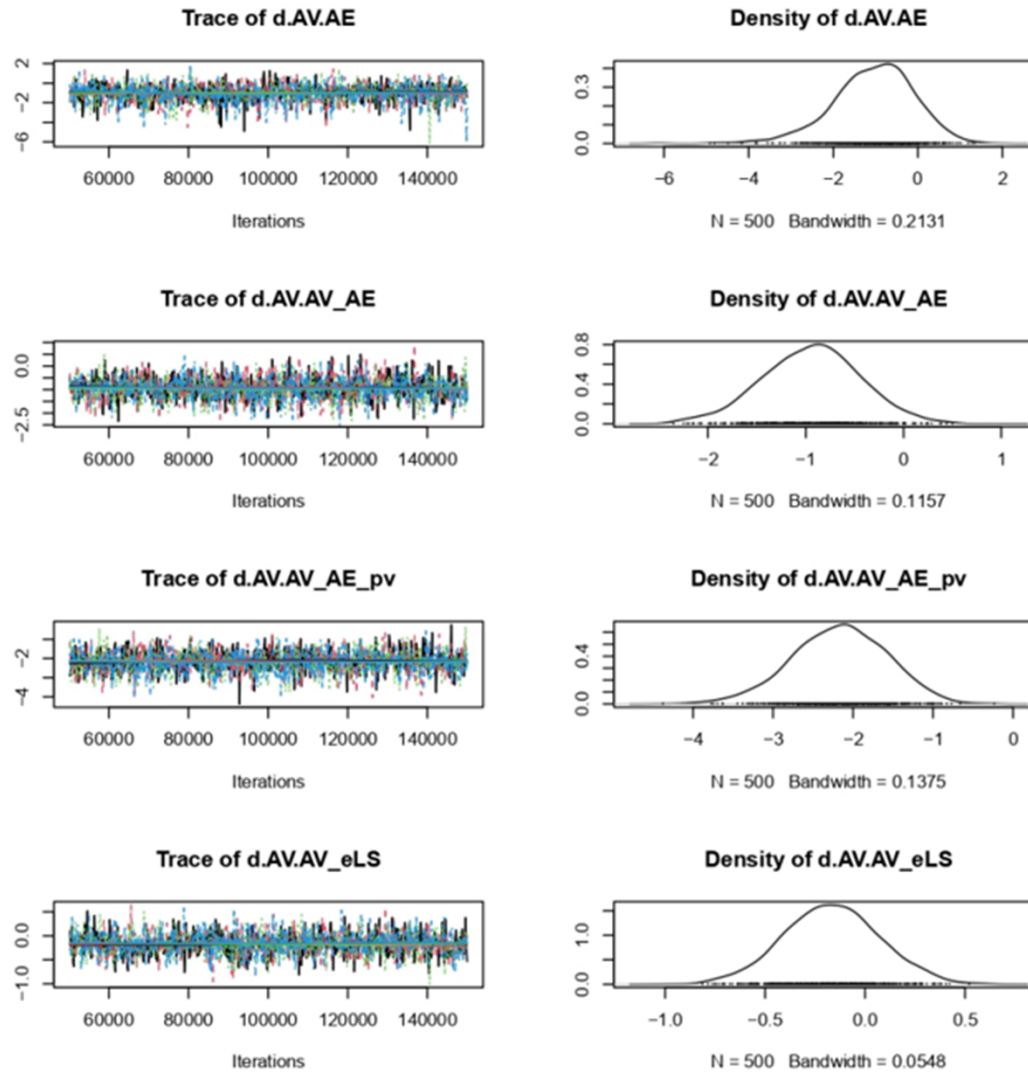



**Trace of d.AV.AV\_ENS**

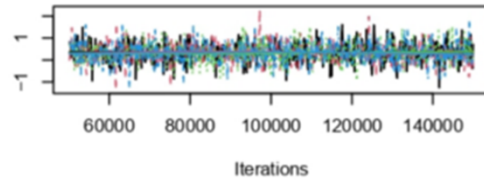

**Density of d.AV.AV\_ENS**

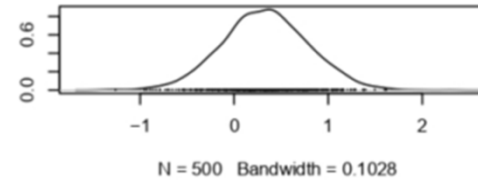

**Trace of d.AV.AV\_iLS**

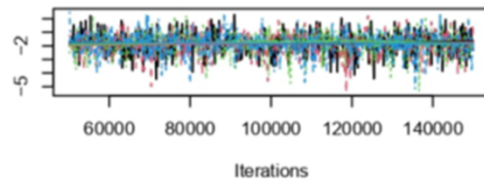

**Density of d.AV.AV\_iLS**

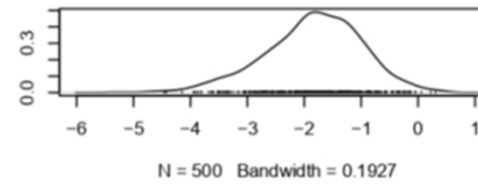

**Trace of d.AV.AV\_sLS**

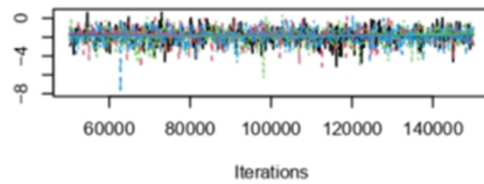

**Density of d.AV.AV\_sLS**

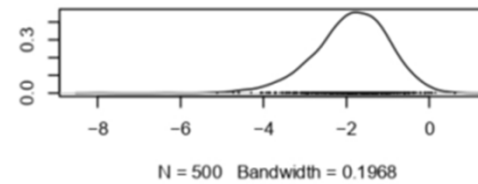

**Trace of d.AV.AV\_SR**

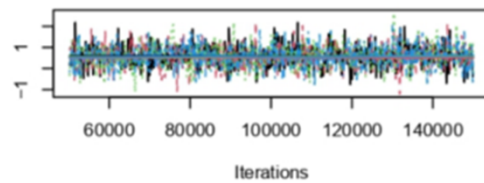

**Density of d.AV.AV\_SR**

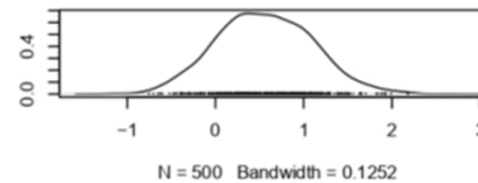

**Trace of d.AV.CTR**

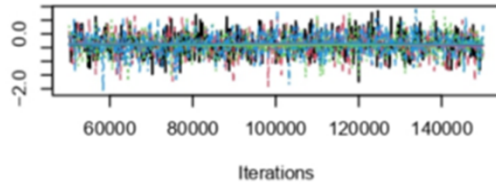

**Density of d.AV.CTR**

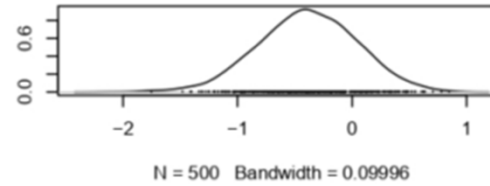

**Trace of d.AV.ENS**

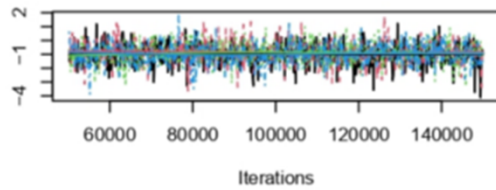

**Density of d.AV.ENS**

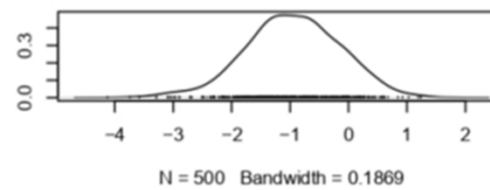

**Trace of d.AV.RTx**

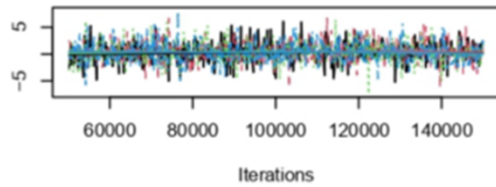

**Density of d.AV.RTx**

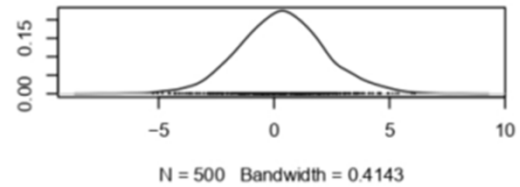

**Trace of d.AV.SR**

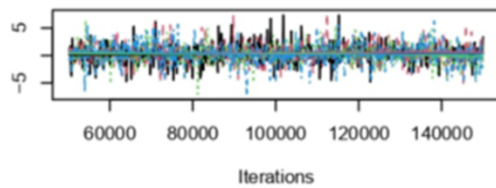

**Density of d.AV.SR**

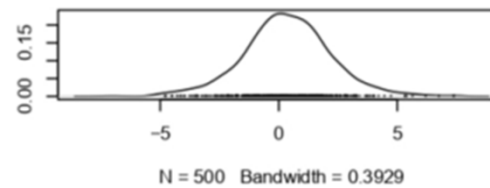

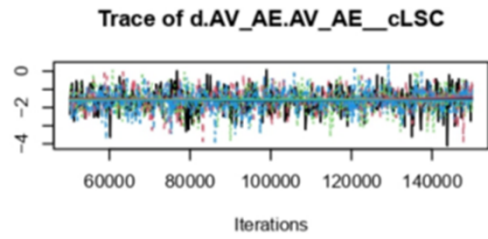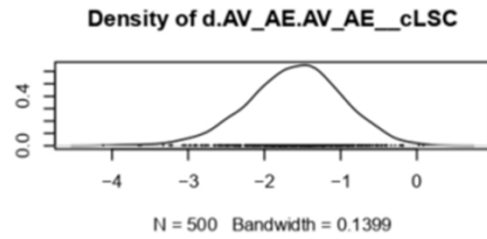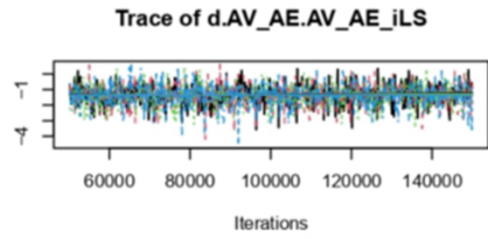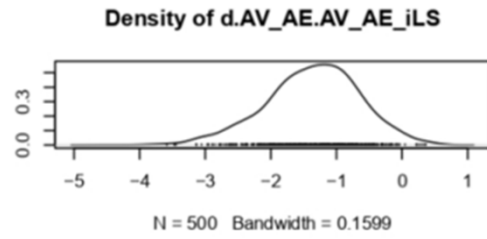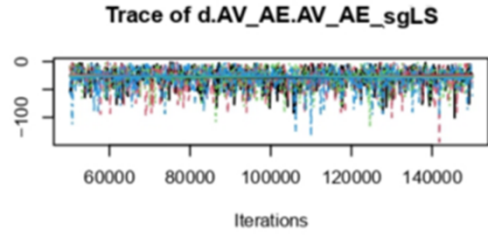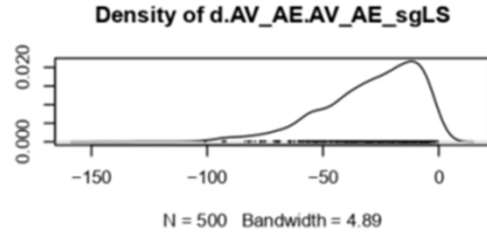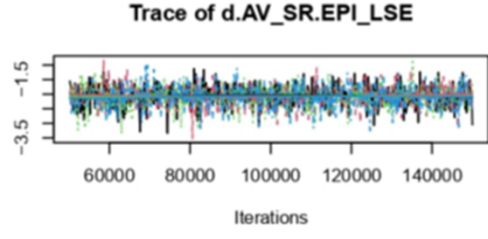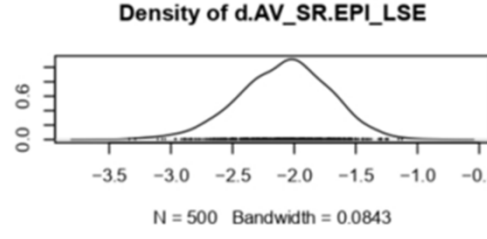

**Supplementary Fig. 3E.** trace and density plot in random model for the incidence of postherpetic neuralgia at 6 mo after acute herpes zoster

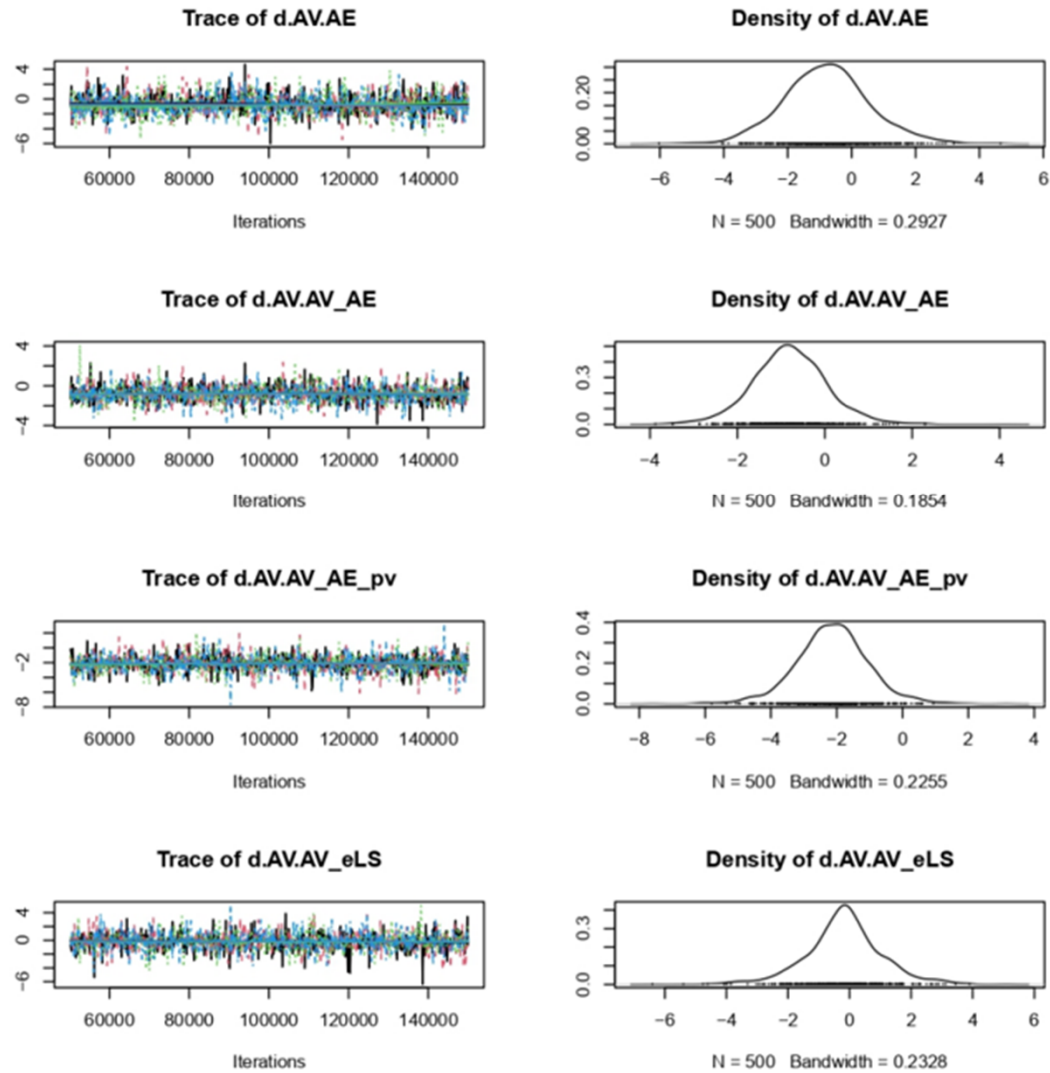

**Trace of d.AV.AV\_ENS**

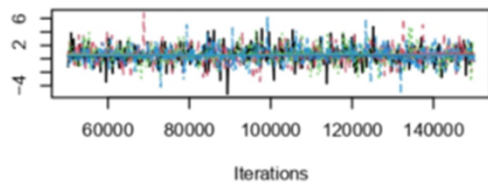

**Density of d.AV.AV\_ENS**

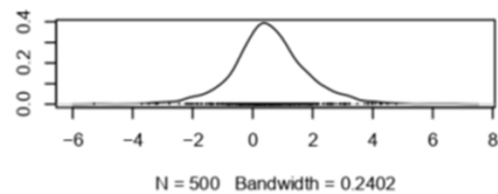

**Trace of d.AV.AV\_iLS**

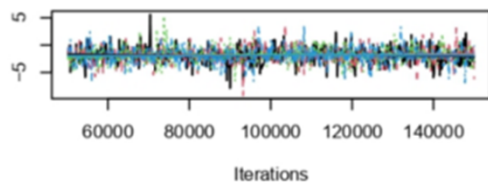

**Density of d.AV.AV\_iLS**

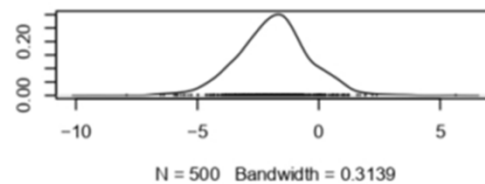

**Trace of d.AV.AV\_sLS**

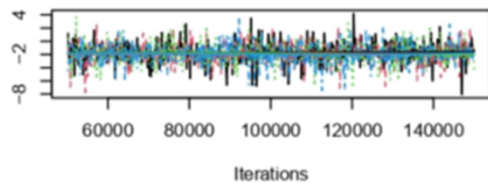

**Density of d.AV.AV\_sLS**

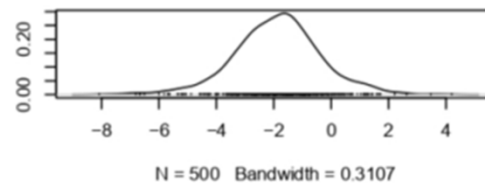

**Trace of d.AV.AV\_SR**

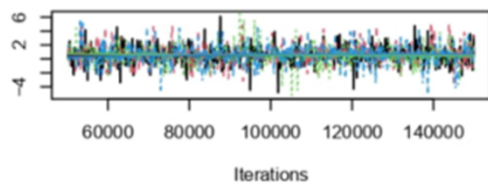

**Density of d.AV.AV\_SR**

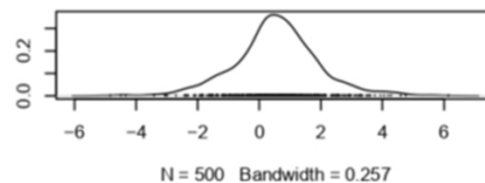

**Trace of d.AV.CTR**

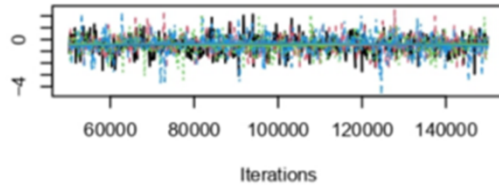

**Density of d.AV.CTR**

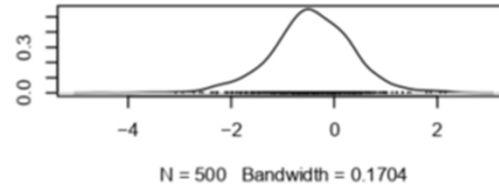

**Trace of d.AV.ENS**

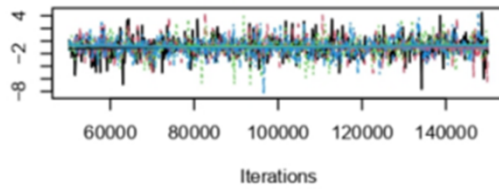

**Density of d.AV.ENS**

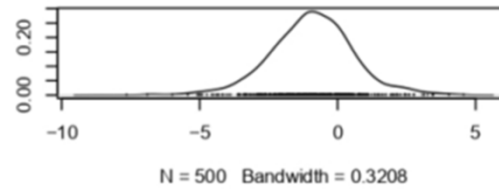

**Trace of d.AV.RTx**

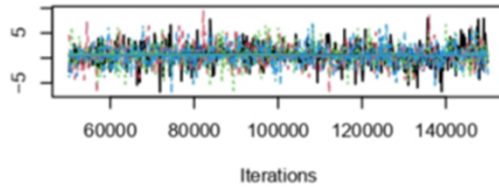

**Density of d.AV.RTx**

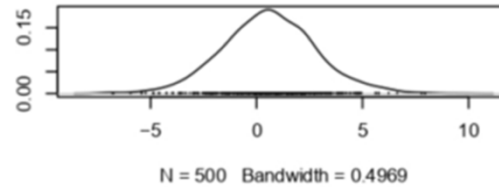

**Trace of d.AV.SR**

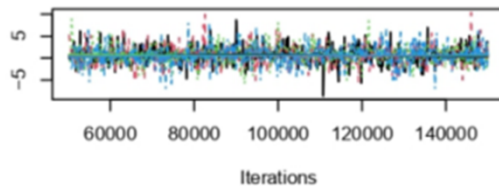

**Density of d.AV.SR**

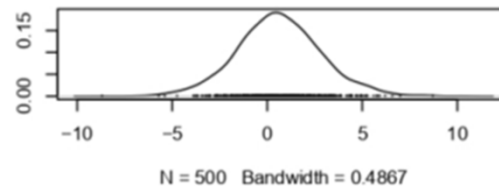

Trace of d.AV\_AE.AV\_AE\_cLSC

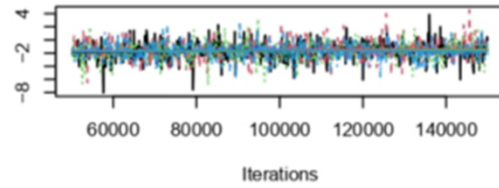

Density of d.AV\_AE.AV\_AE\_cLSC

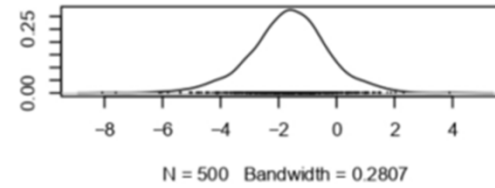

Trace of d.AV\_AE.AV\_AE\_iLS

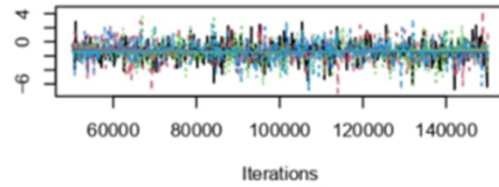

Density of d.AV\_AE.AV\_AE\_iLS

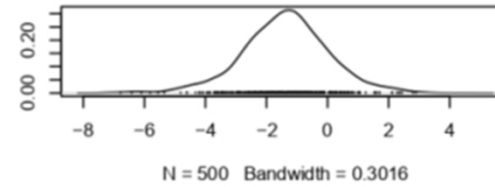

Trace of d.AV\_AE.AV\_AE\_sgLS

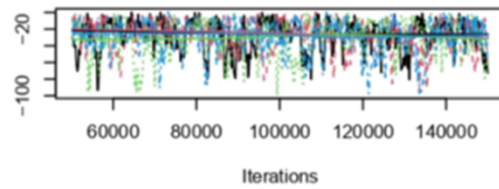

Density of d.AV\_AE.AV\_AE\_sgLS

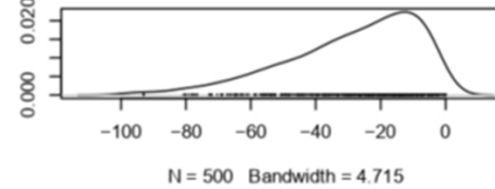

Trace of d.AV\_SR.EPI\_LSE

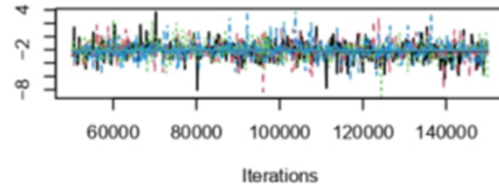

Density of d.AV\_SR.EPI\_LSE

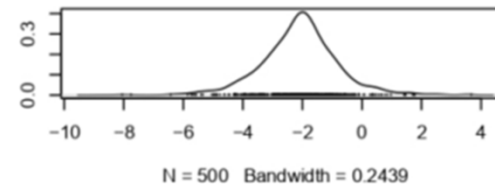

**Trace of sd.d**

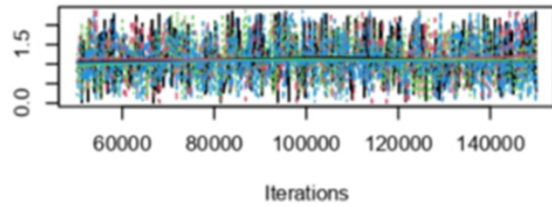

**Density of sd.d**

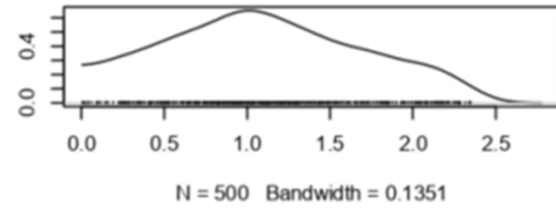



**Supplementary Fig. 3F.** Gelman-Rubin-Brooks in fixed model for the incidence of postherpetic neuralgia at 6 mo after acute herpes zoster

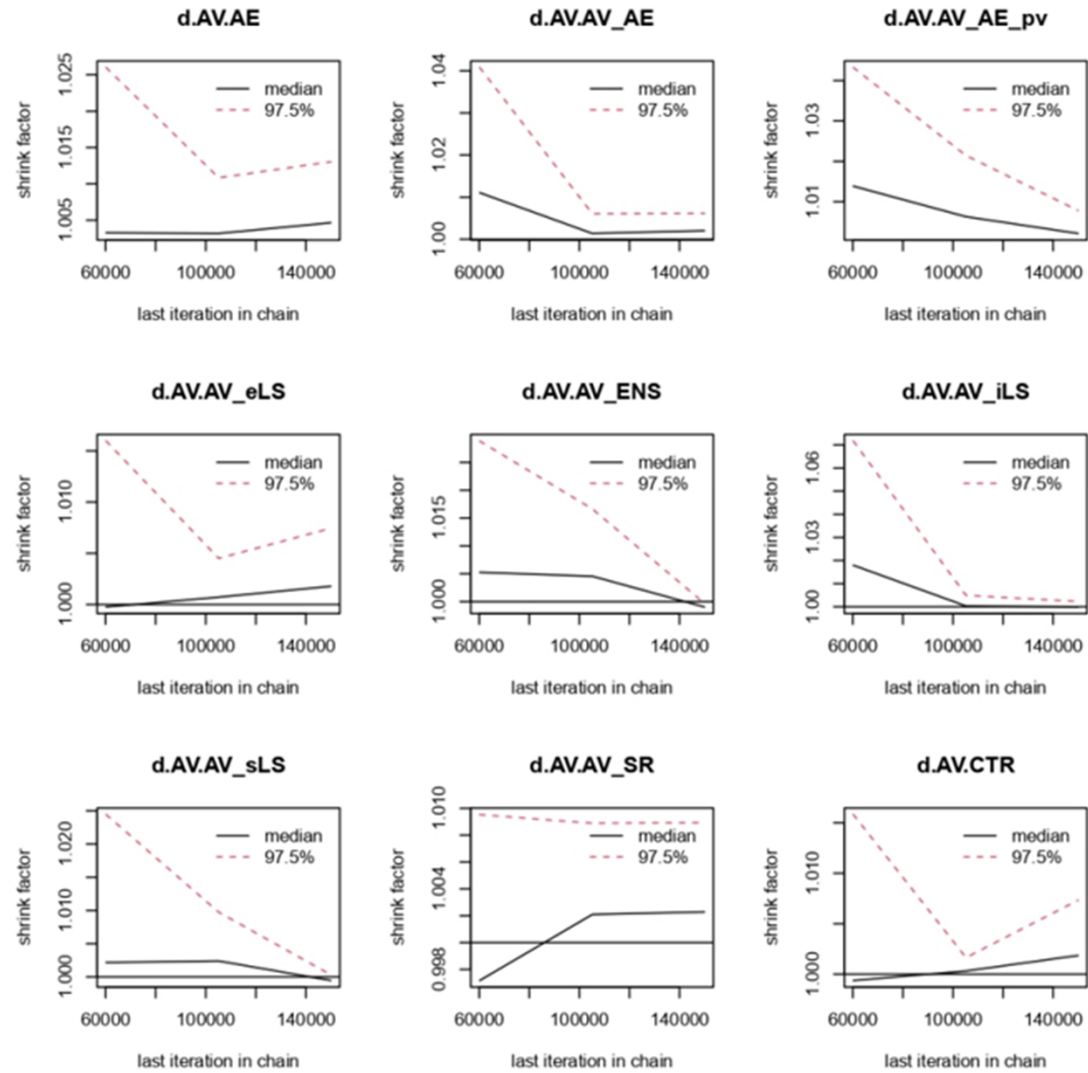

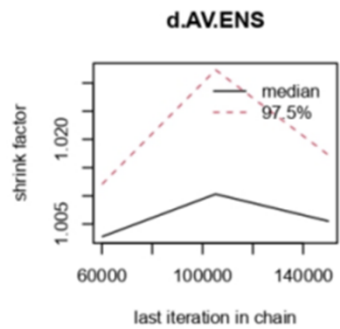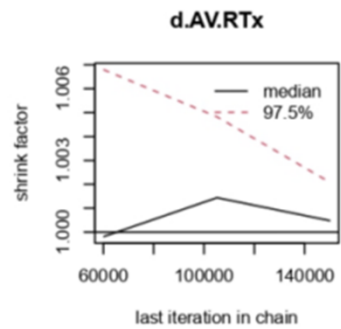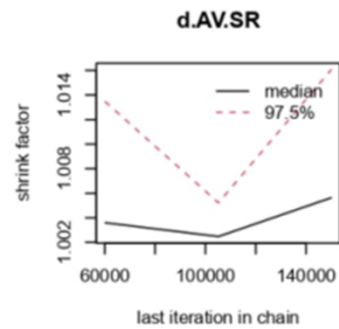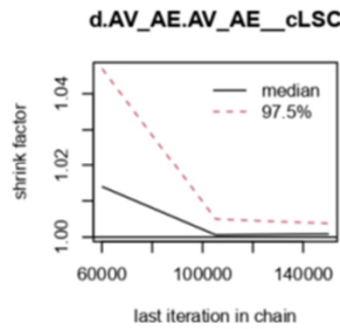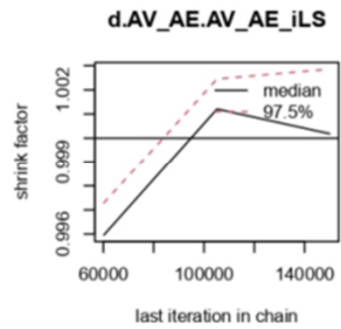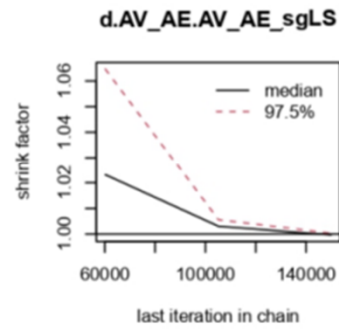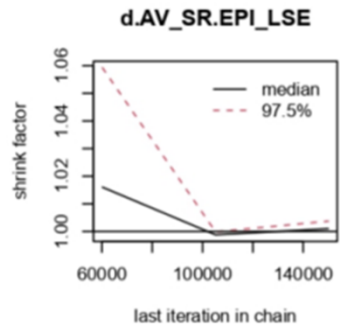

**Supplementary Fig. 3G.** Gelman-Rubin-Brooks in random model for the incidence of postherpetic neuralgia at 6 mo after acute herpes zoster

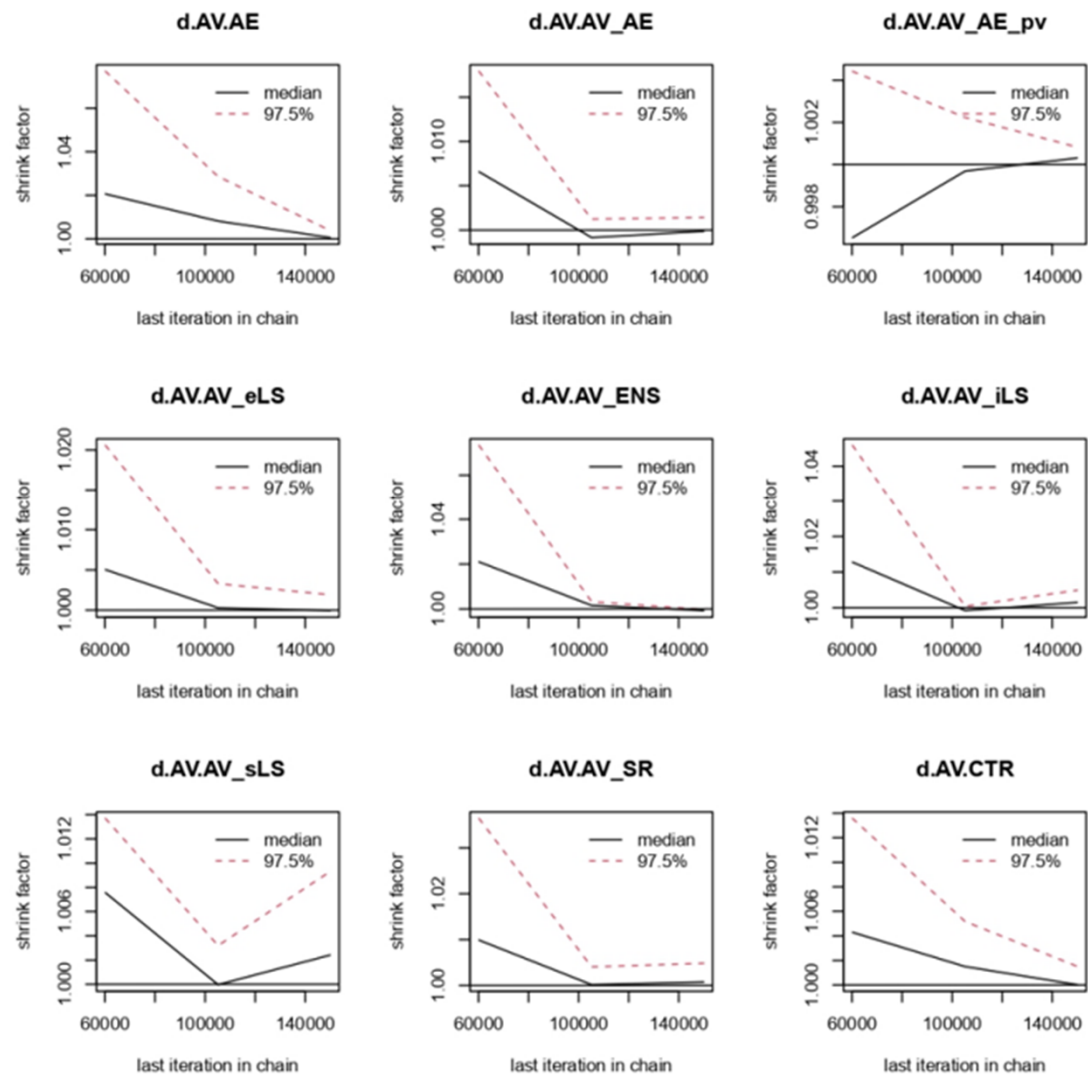

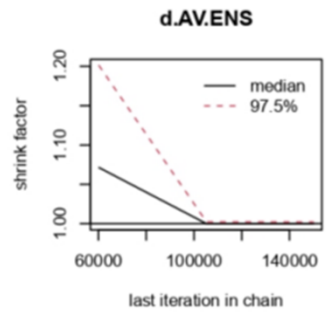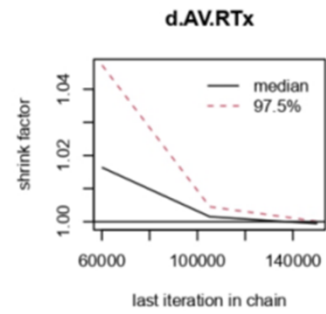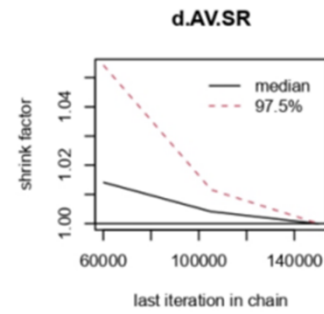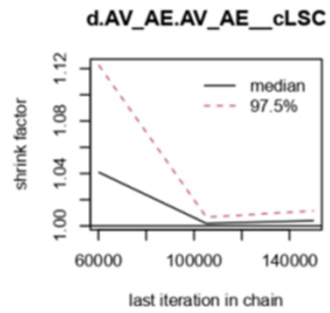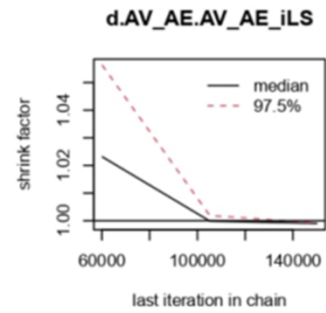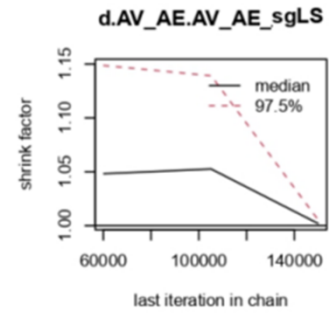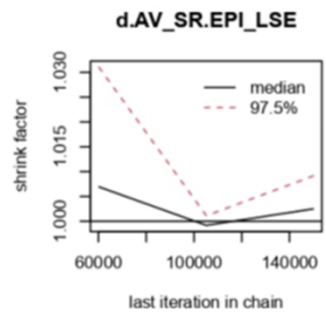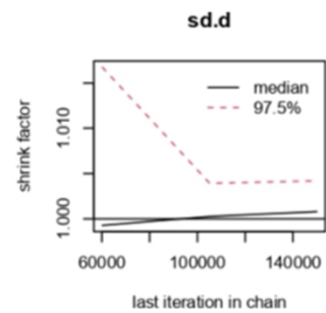

**Supplementary Fig. 4A.** Predictive Interval Plot comparing all groups for the pain score measured at 3 mo after acute herpes zoster

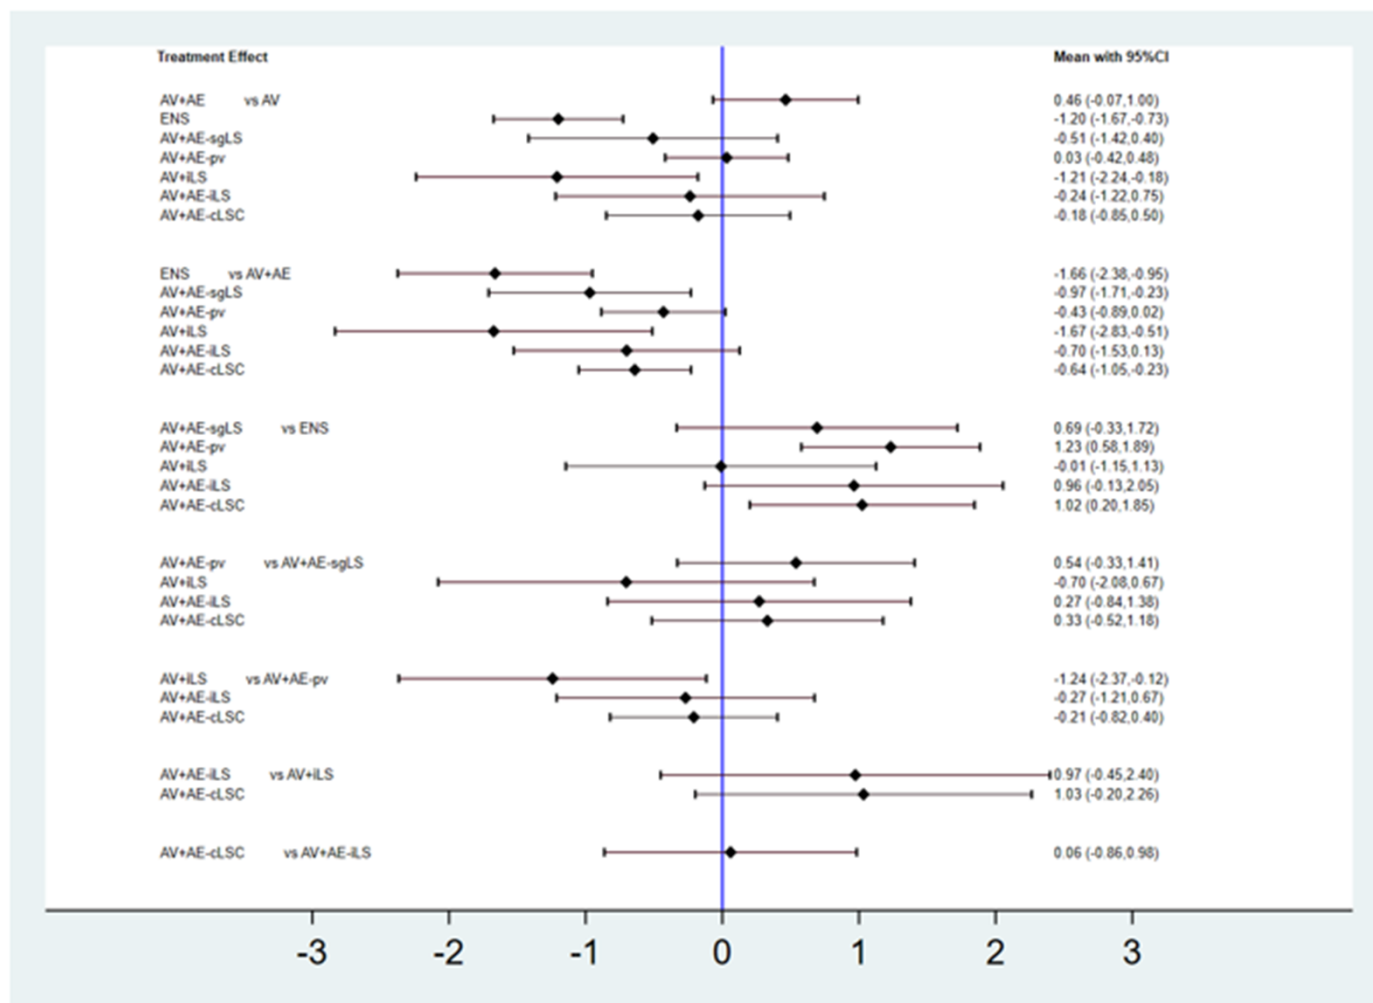

**Supplementary Fig. 4B.** The rankograms of the pain score measured at 3 mo after acute herpes zoster

Profiles indicate the probabilities for treatments to assume any of the possible ranks. It is the probability that a given treatment ranks first, second, third, and so on, among all of the treatments evaluated in the NMA.

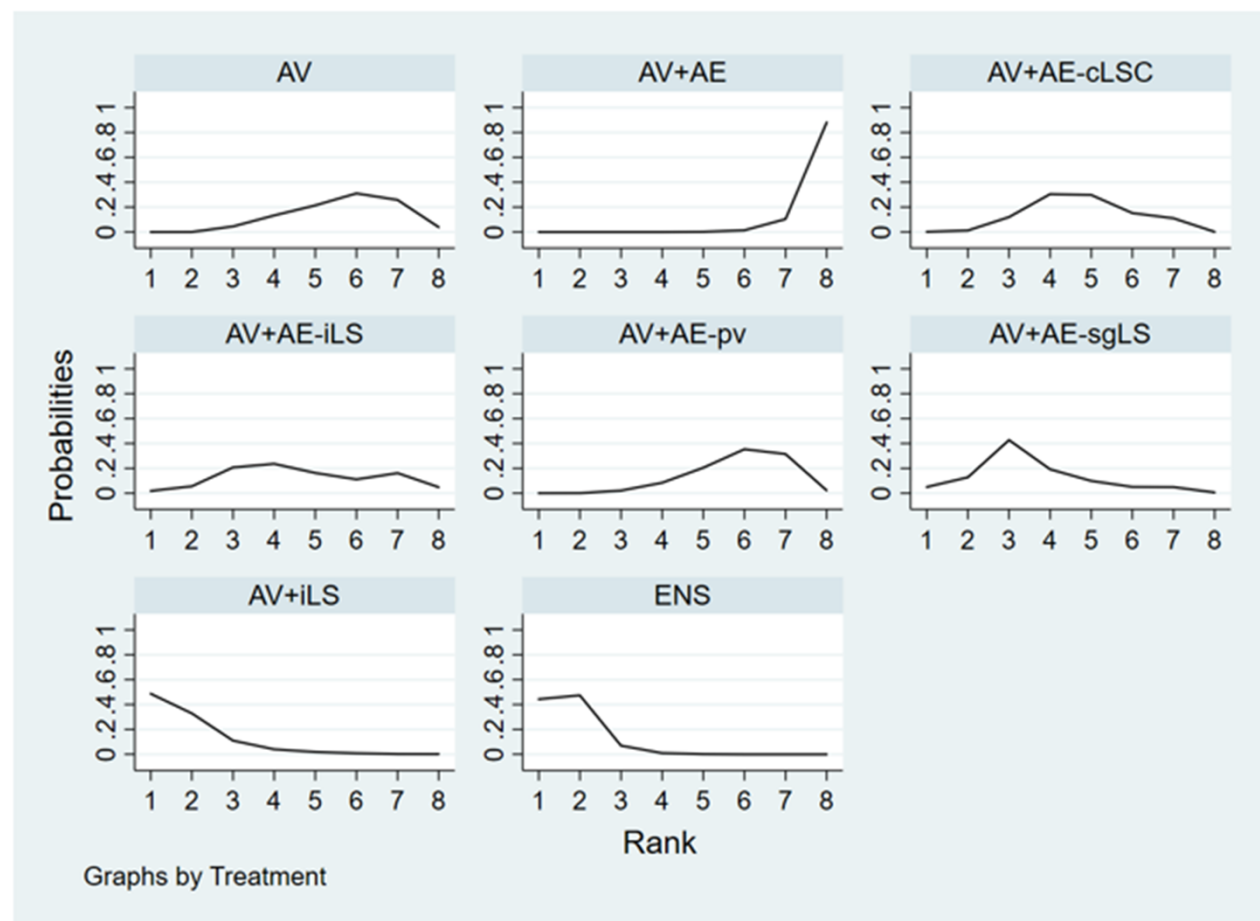

**Supplementary Fig. 4C.** The cumulative ranking curves of the pain score measured at 3 mo after acute herpes zoster

The profile indicates the sum of the probabilities from those ranked first, second, third, and so on. A higher cumulative ranking curve (surface of under cumulative ranking curve [SUCRA]) value is regarded as an improved result for an individual's intervention. When ranking treatments, the closer the SUCRA value is to 100%, the higher the treatment ranking is relative to all other treatments.

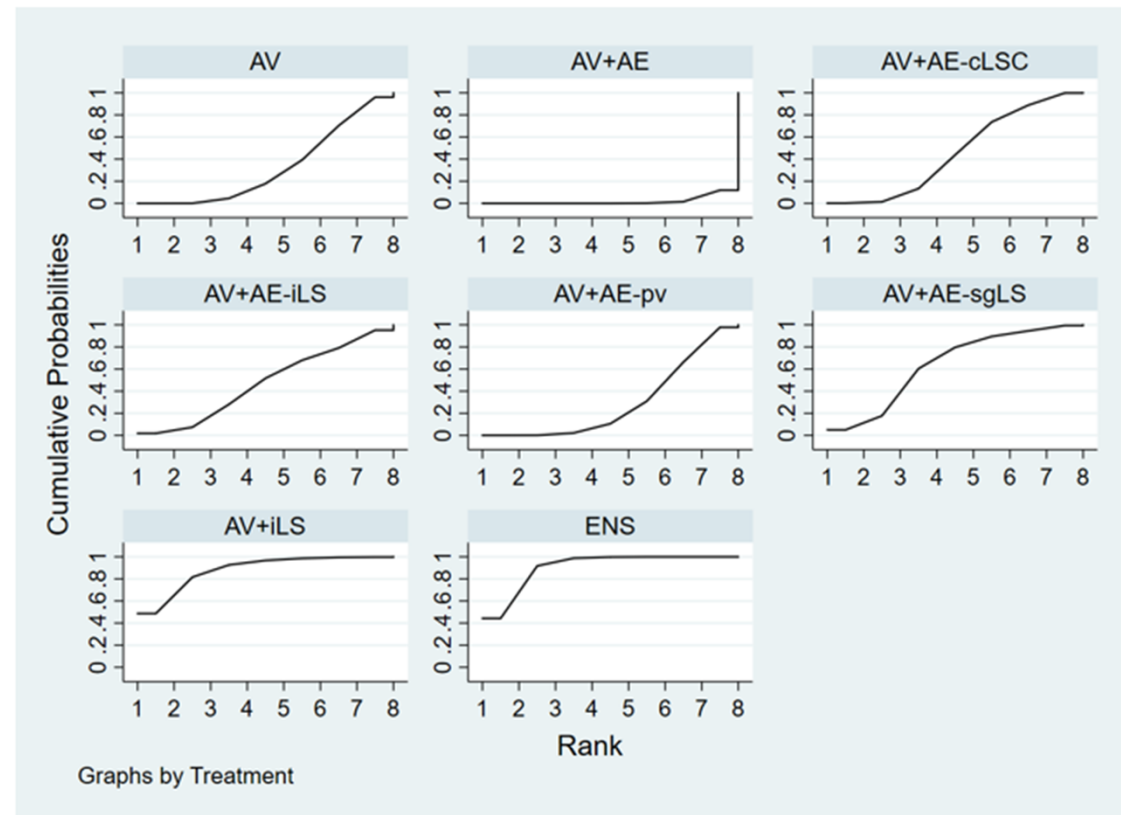

**Supplementary Fig. 4D.** Trace and density plot in fixed model for the pain score measured at 3 mo after acute herpes zoster

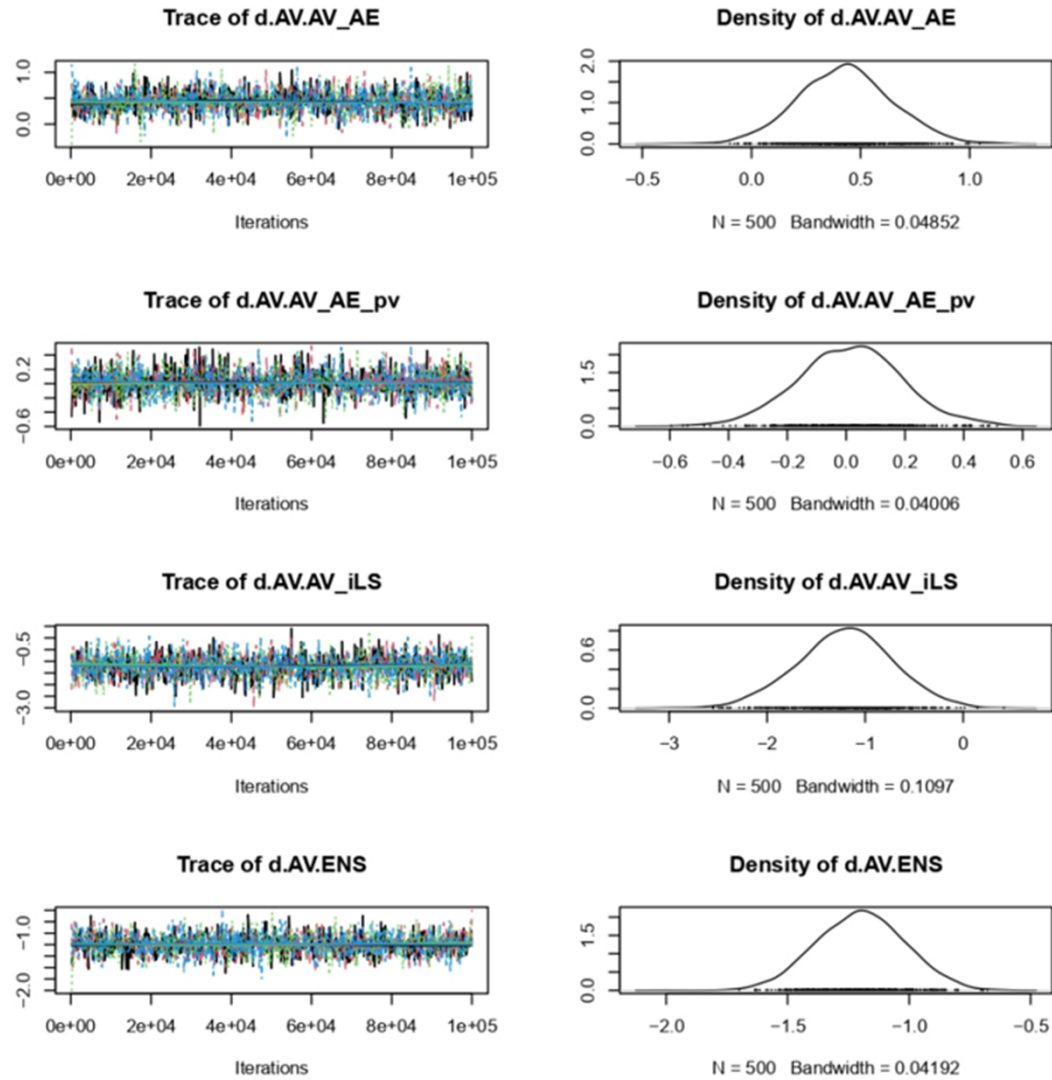



**Trace of d.AV\_AE.AV\_AE\_cLSC**

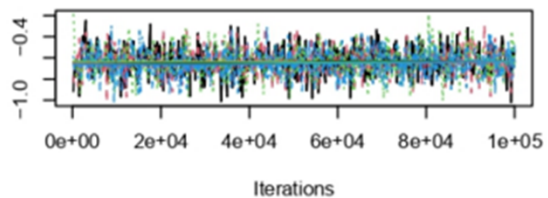

**Density of d.AV\_AE.AV\_AE\_cLSC**

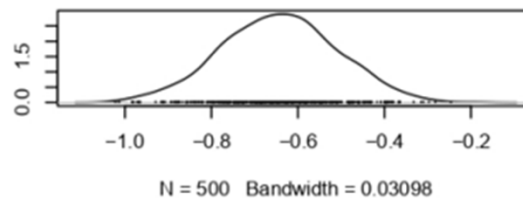

**Trace of d.AV\_AE.AV\_AE\_iLS**

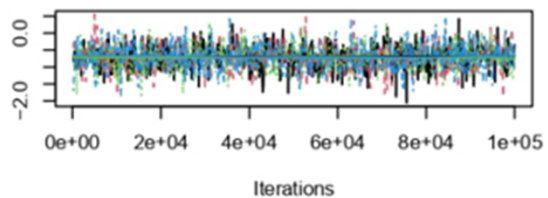

**Density of d.AV\_AE.AV\_AE\_iLS**

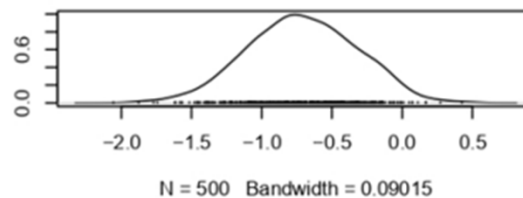

**Trace of d.AV\_AE.AV\_AE\_sgLS**

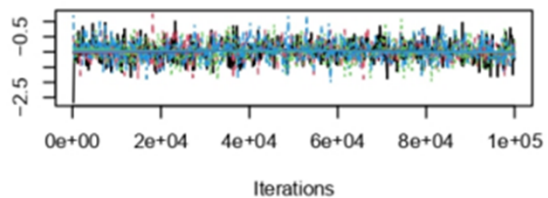

**Density of d.AV\_AE.AV\_AE\_sgLS**

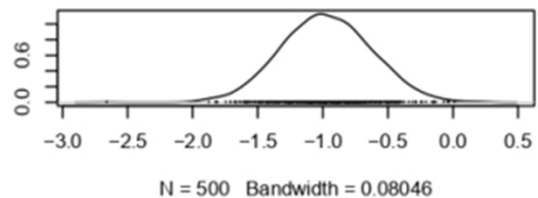

**Supplementary Fig. 4E.** trace and density plot in random model for the pain score measured at 3 mo after acute herpes zoster

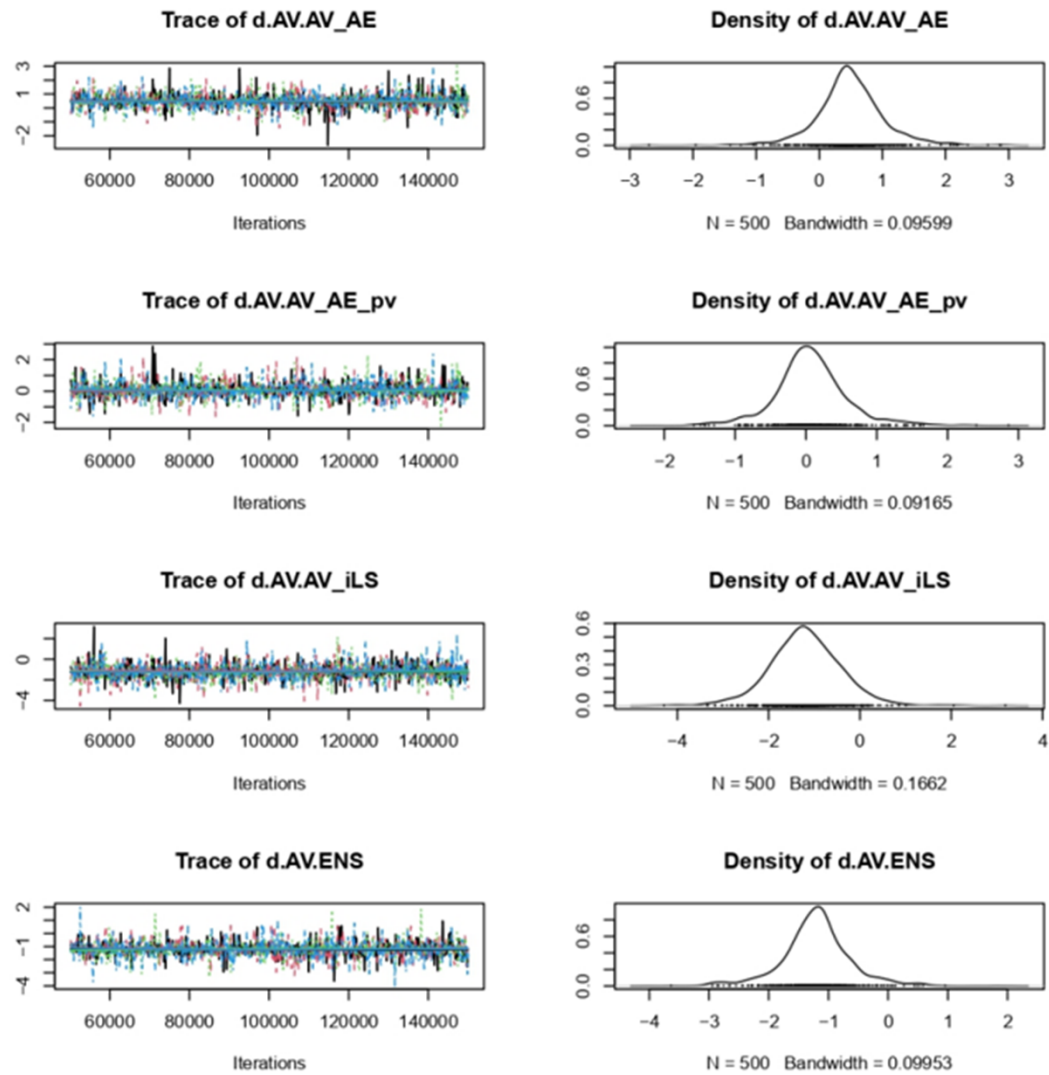

**Trace of d.AV\_AE.AV\_AE\_cLSC**

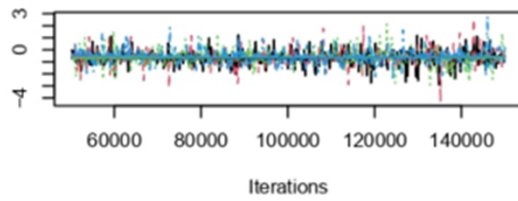

**Density of d.AV\_AE.AV\_AE\_cLSC**

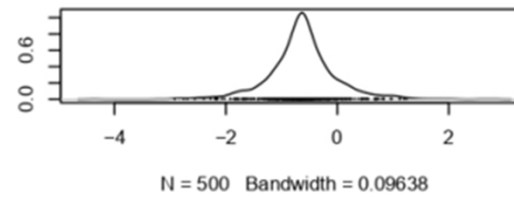

**Trace of d.AV\_AE.AV\_AE\_iLS**

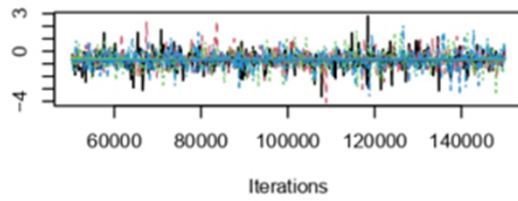

**Density of d.AV\_AE.AV\_AE\_iLS**

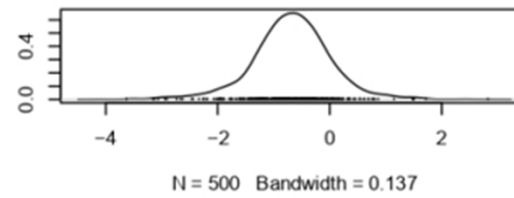

**Trace of d.AV\_AE.AV\_AE\_sgLS**

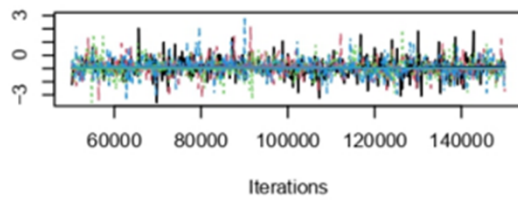

**Density of d.AV\_AE.AV\_AE\_sgLS**

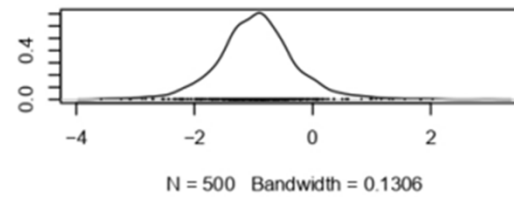

**Trace of sd.d**

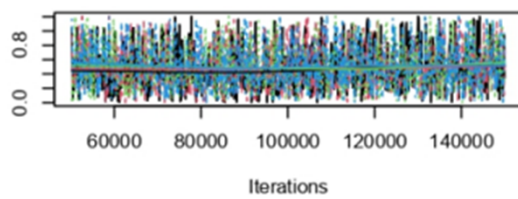

**Density of sd.d**

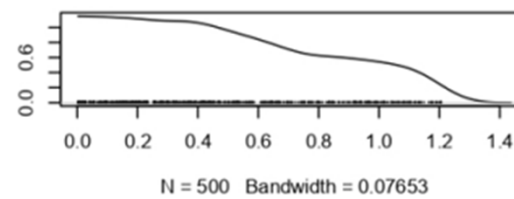

**Supplementary Fig. 4F.** Gelman-Rubin-Brooks in fixed model for the pain score measured at 3 mo after acute herpes zoster

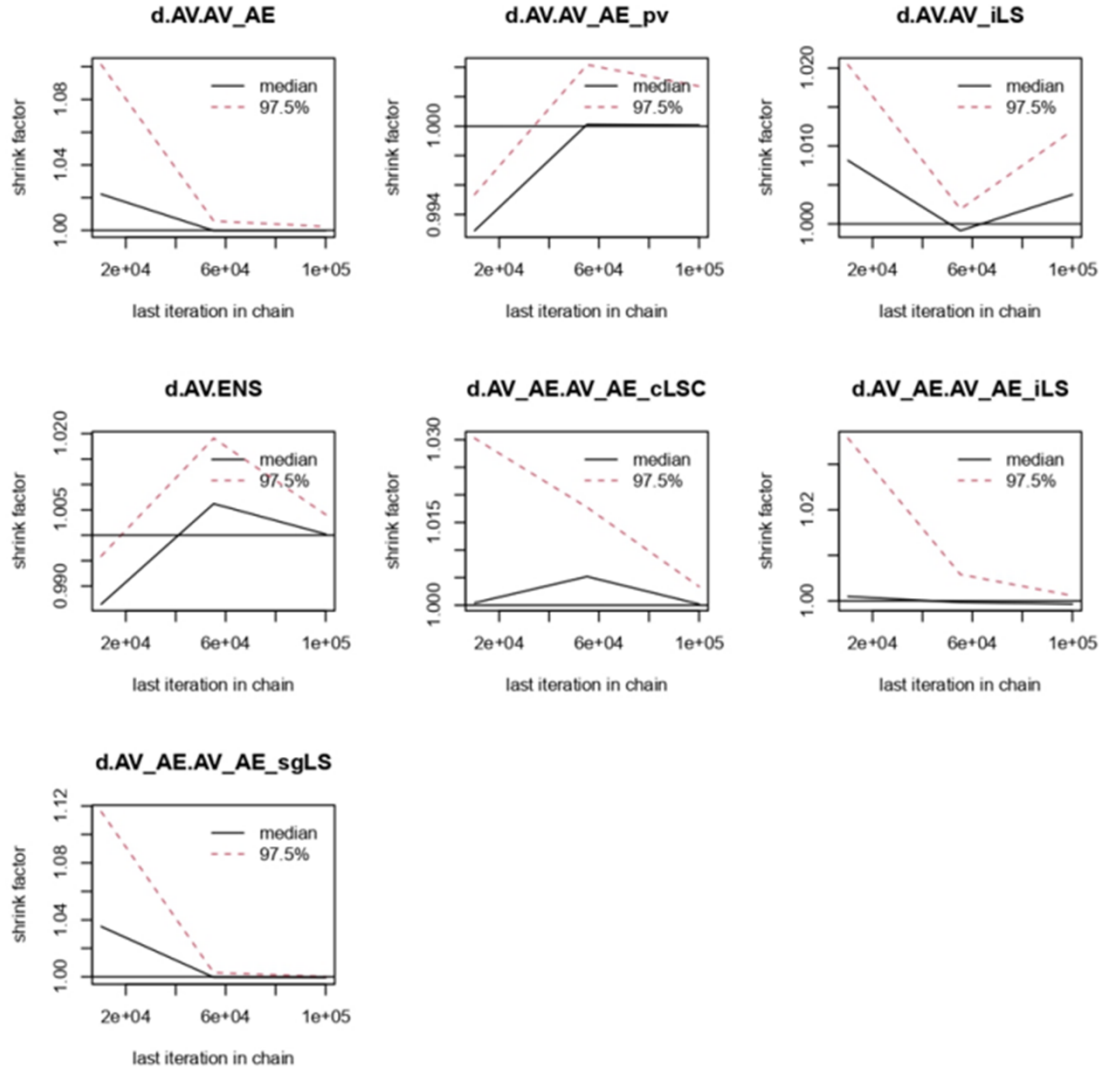

**Supplementary Fig. 4G.** Gelman-Rubin-Brooks in random model for the pain score measured at 3 mo after acute herpes zoster

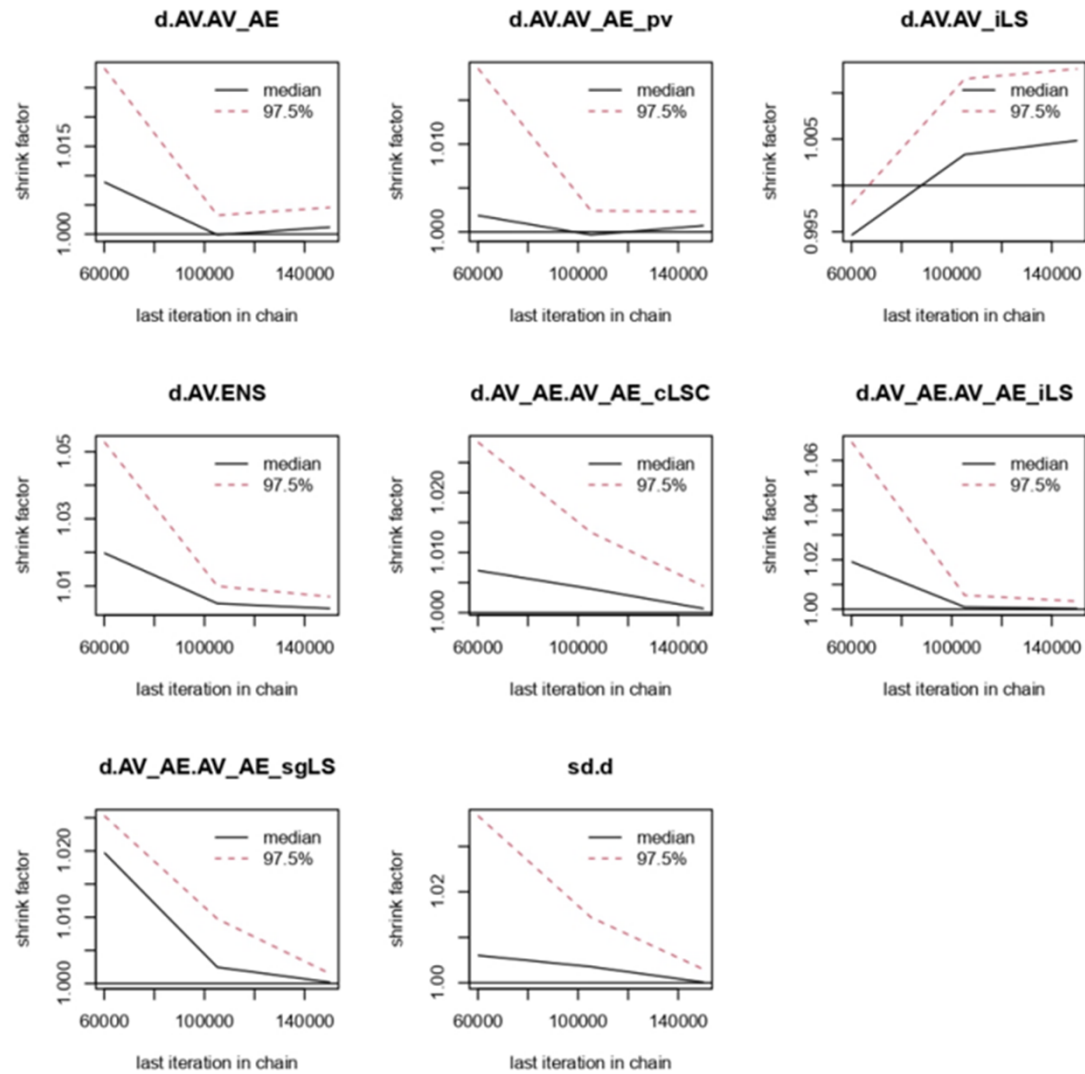

**Supplementary Fig. 5A.** Predictive Interval Plot comparing all groups for the pain score measured at 1 mo after acute herpes zoster

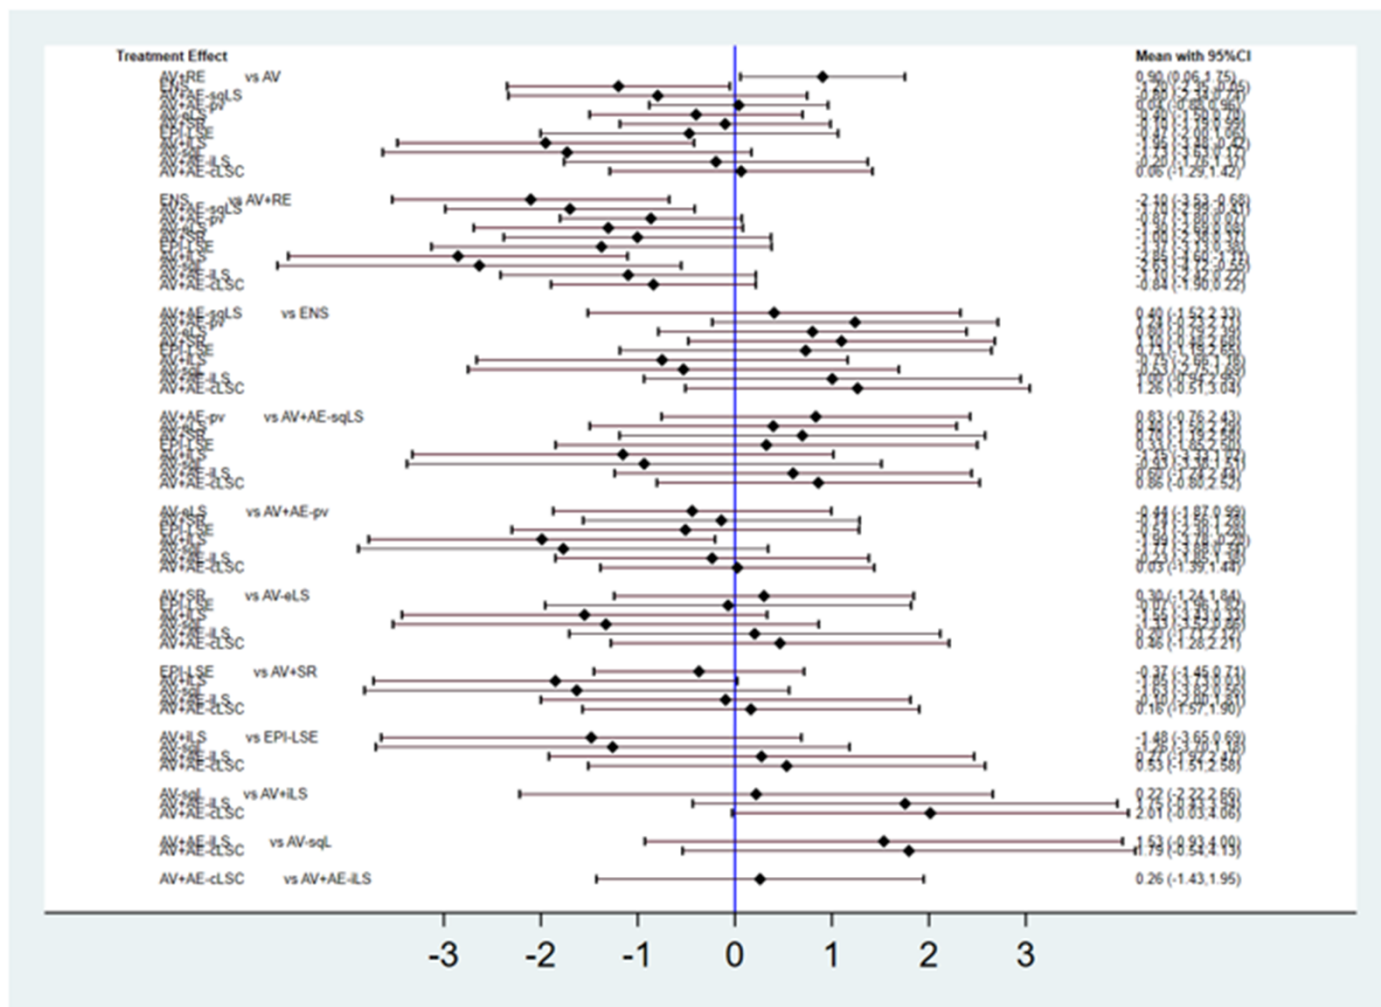

**Supplementary Fig. 5B.** The rankograms of the pain score measured at 1 mo after acute herpes zoster

Profiles indicate the probabilities for treatments to assume any of the possible ranks. It is the probability that a given treatment ranks first, second, third, and so on, among all of the treatments evaluated in the NMA.

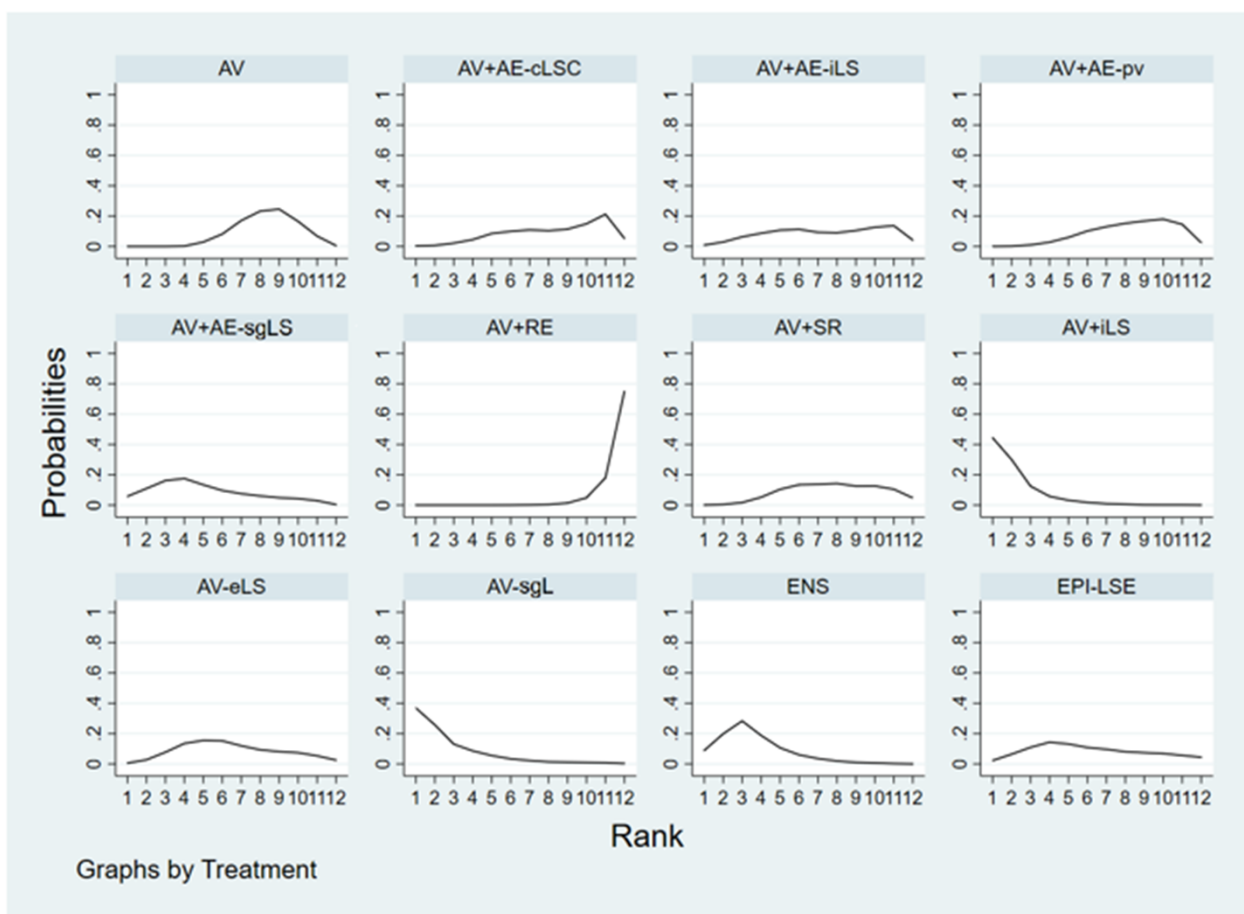

**Supplementary Fig. 5C.** The cumulative ranking curves of the pain score measured at 1 mo after acute herpes zoster

The profile indicates the sum of the probabilities from those ranked first, second, third, and so on. A higher cumulative ranking curve (surface of under cumulative ranking curve [SUCRA]) value is regarded as an improved result for an individual's intervention. When ranking treatments, the closer the SUCRA value is to 100%, the higher the treatment ranking is relative to all other treatments.

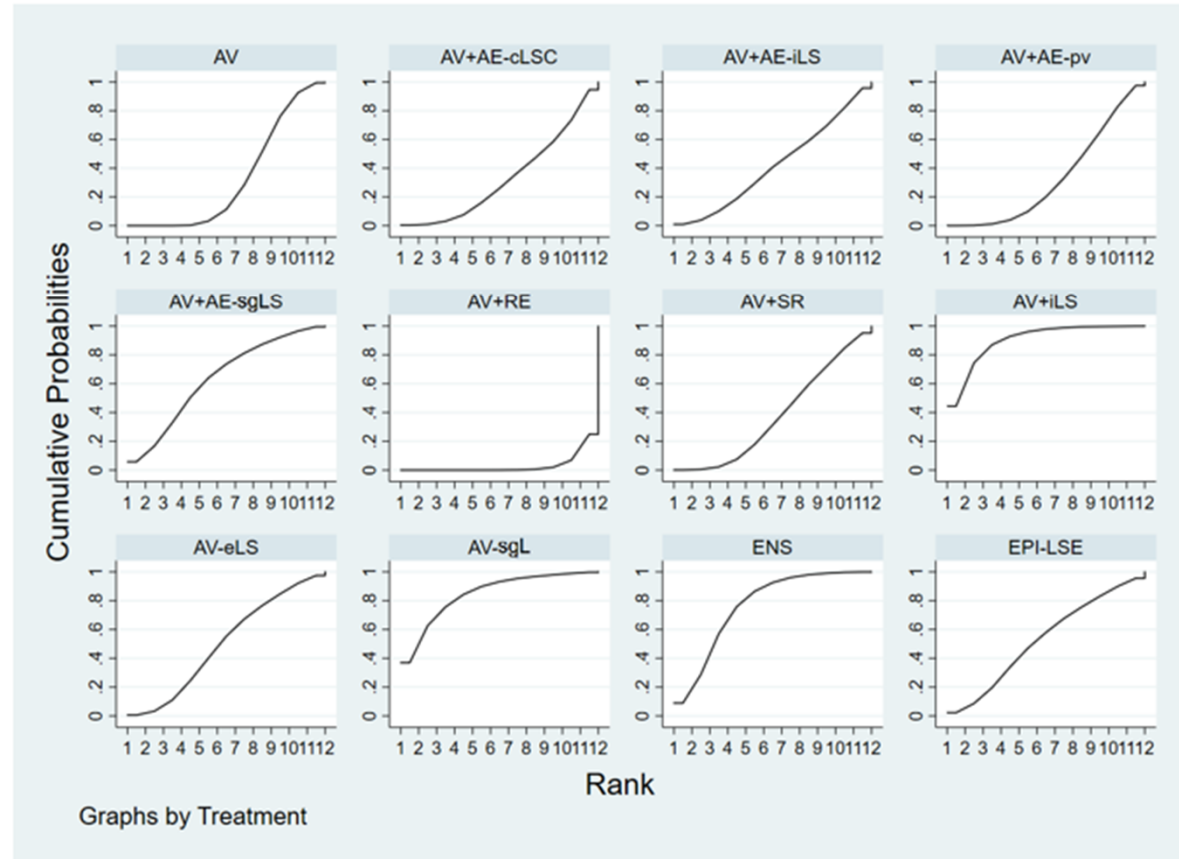



**Supplementary Fig. 5D.** Trace and density plot in fixed model for the pain score measured at 1 mo after acute herpes zoster

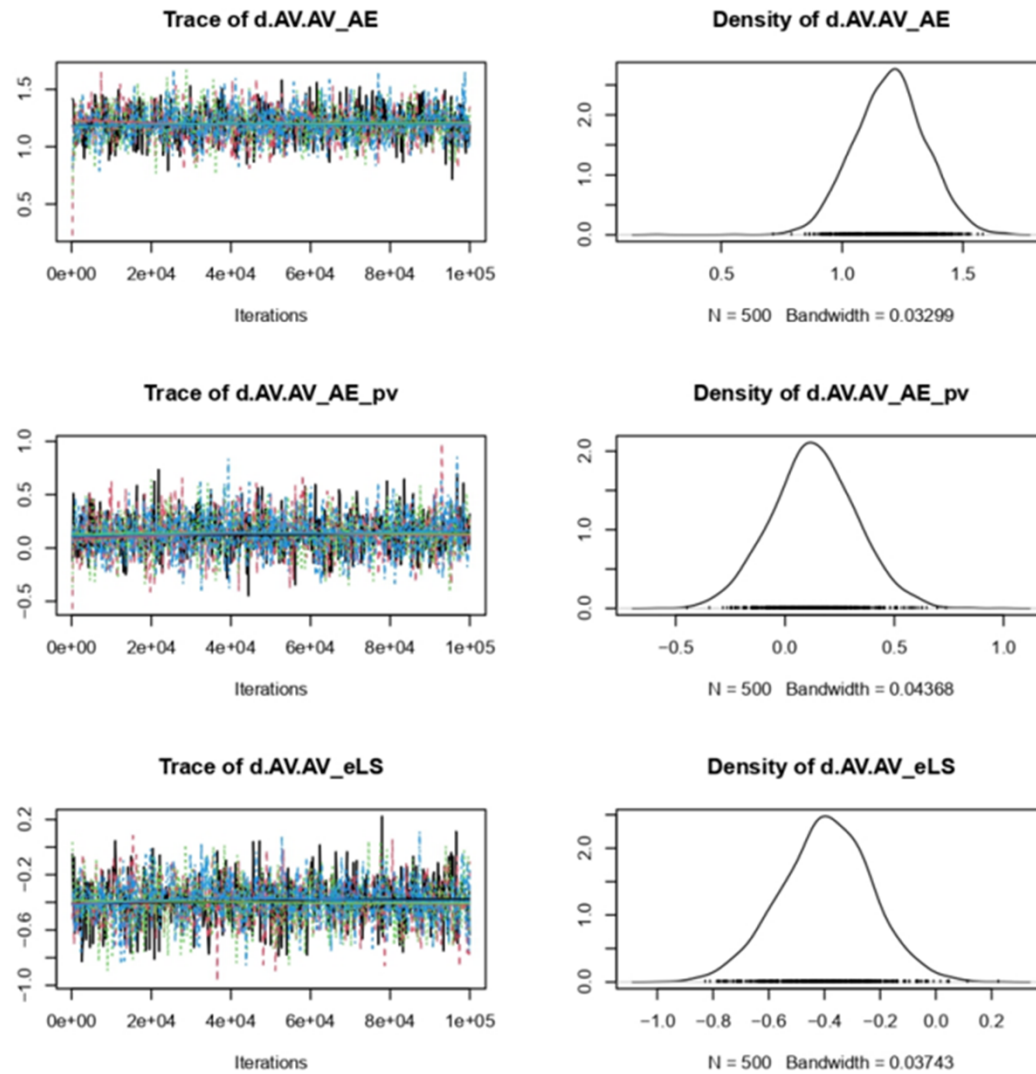

**Trace of d.AV.AV\_iLS**

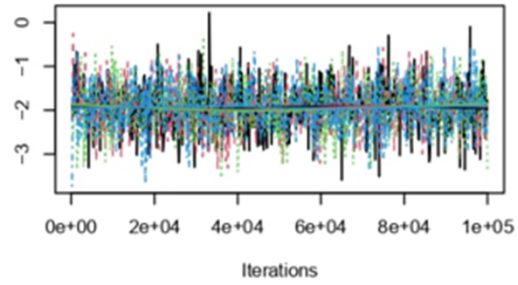

**Density of d.AV.AV\_iLS**

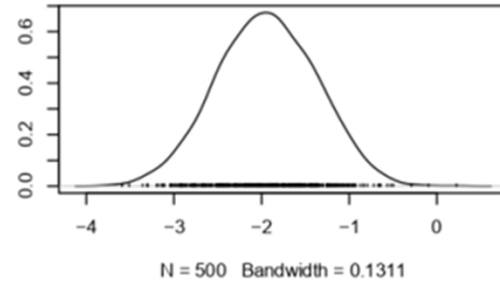

**Trace of d.AV.AV\_sgL**

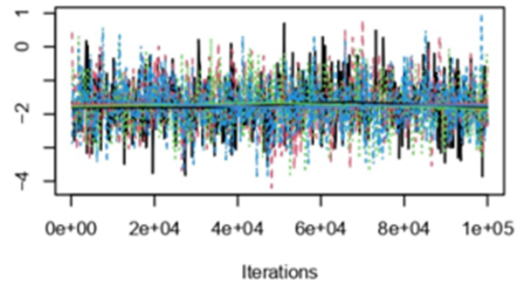

**Density of d.AV.AV\_sgL**

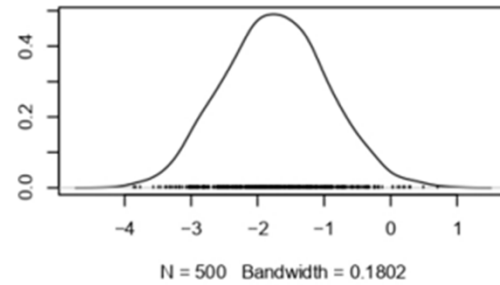

**Trace of d.AV.AV\_SR**

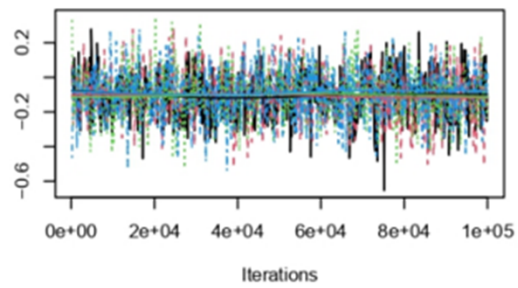

**Density of d.AV.AV\_SR**

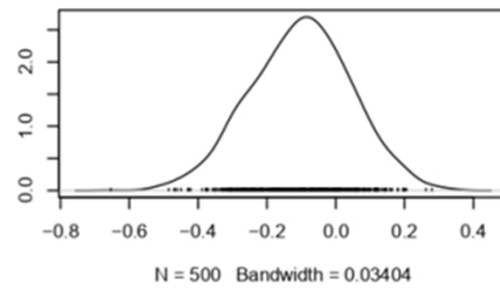

**Trace of d.AV.ENS**

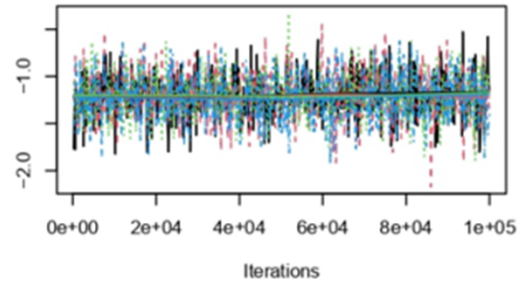

**Density of d.AV.ENS**

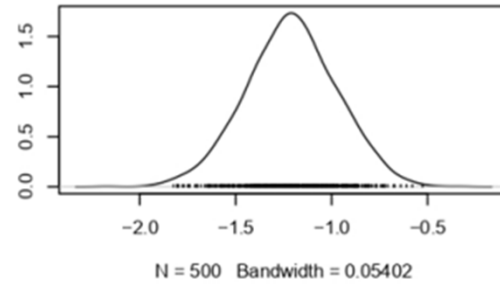

**Trace of d.AV\_AE.AV\_AE\_cLSC**

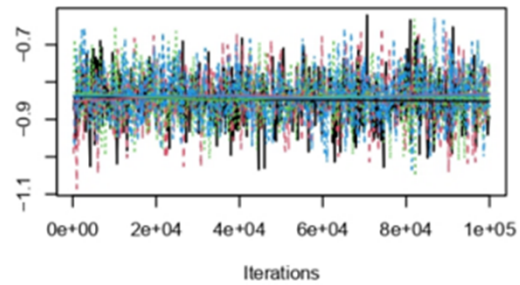

**Density of d.AV\_AE.AV\_AE\_cLSC**

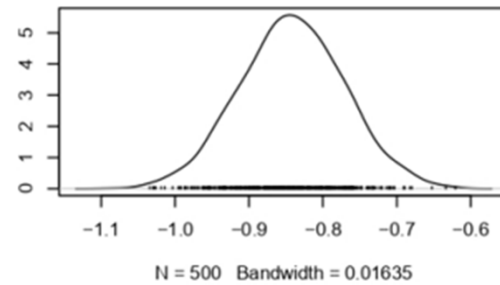

**Trace of d.AV\_AE.AV\_AE\_iLS**

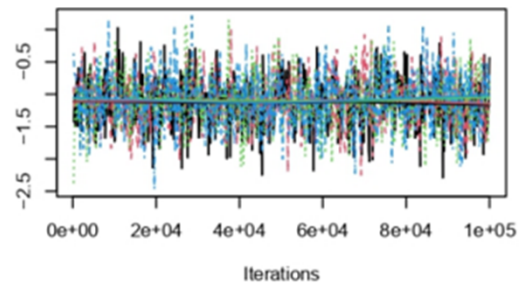

**Density of d.AV\_AE.AV\_AE\_iLS**

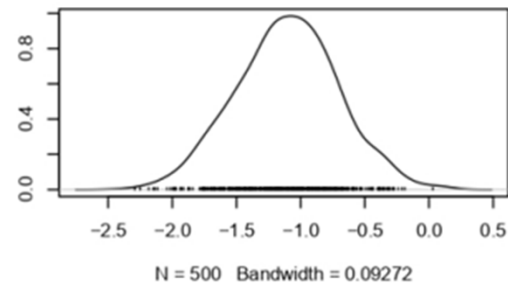

Trace of d.AV\_AE.AV\_AE\_sgLS

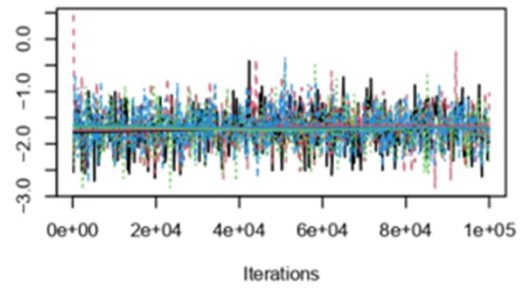

Density of d.AV\_AE.AV\_AE\_sgLS

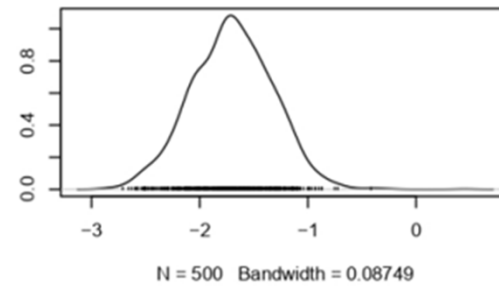

Trace of d.AV\_SR.EPI\_LSE

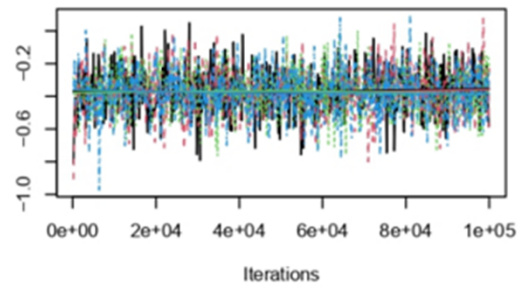

Density of d.AV\_SR.EPI\_LSE

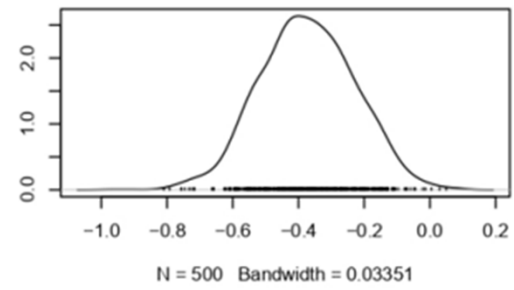

**Supplementary Fig. 5E.** trace and density plot in random model for the pain score measured at 1 mo after acute herpes zoster

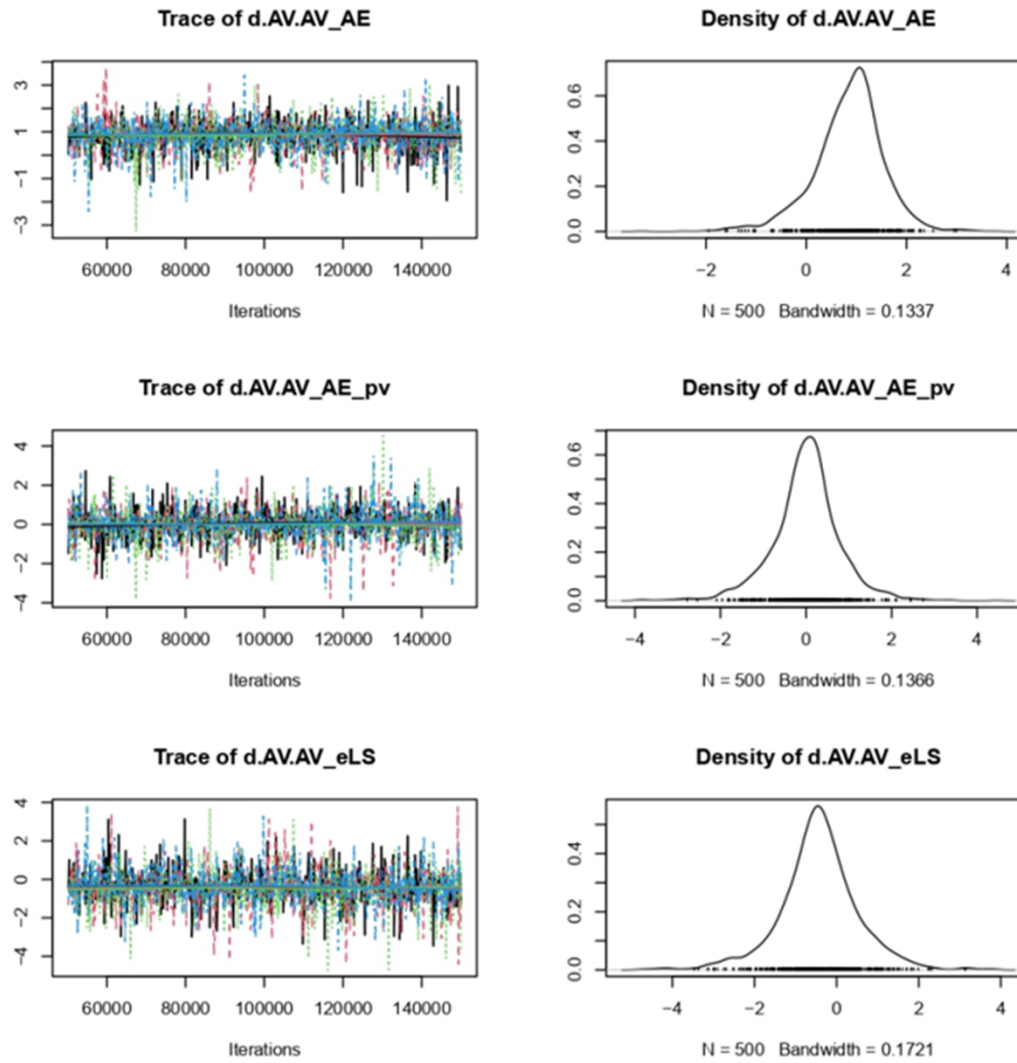

**Trace of d.AV.AV\_iLS**

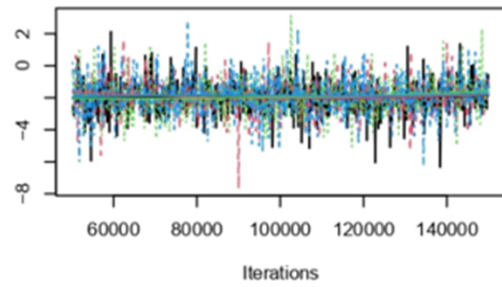

**Density of d.AV.AV\_iLS**

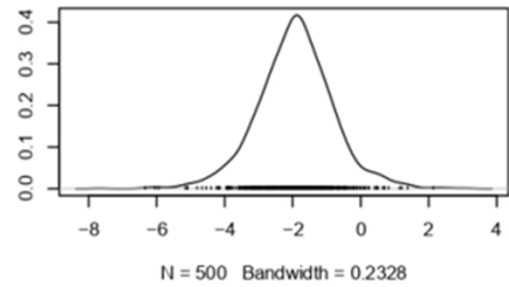

**Trace of d.AV.AV\_sgL**

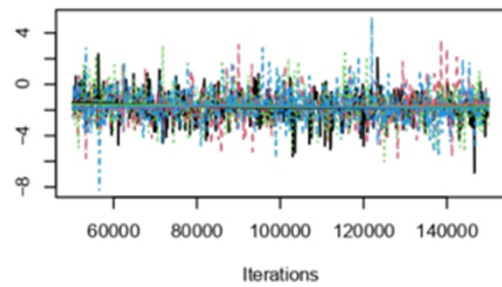

**Density of d.AV.AV\_sgL**

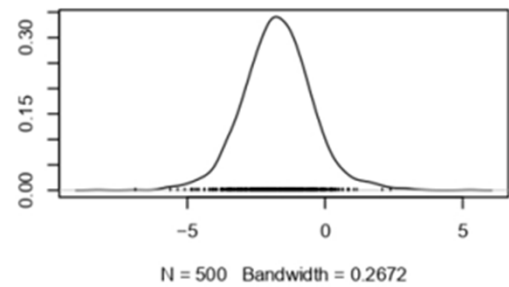

**Trace of d.AV.AV\_SR**

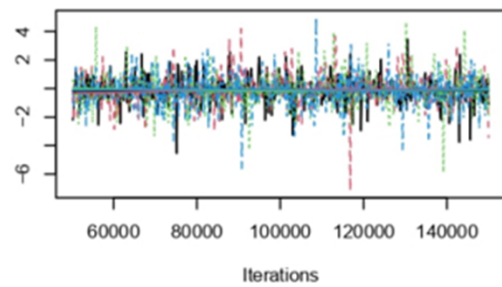

**Density of d.AV.AV\_SR**

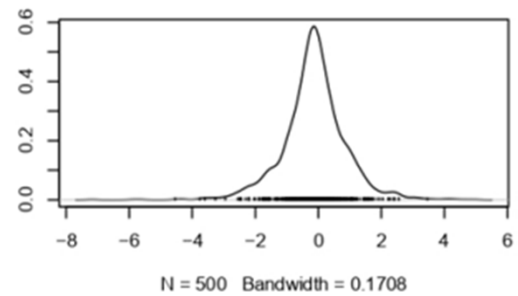

**Trace of d.AV.ENS**

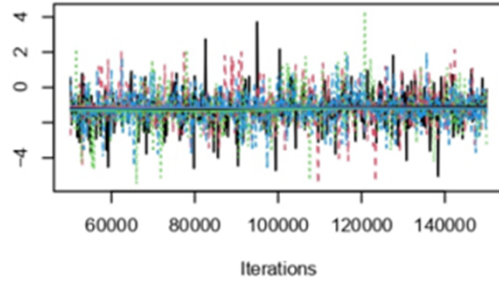

**Density of d.AV.ENS**

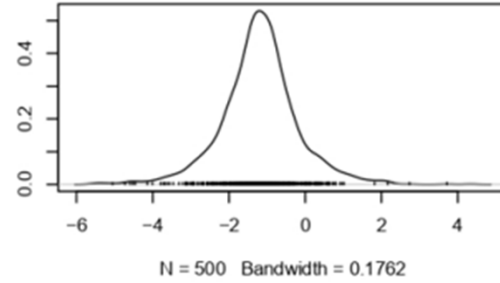

**Trace of d.AV\_AE.AV\_AE\_cLSC**

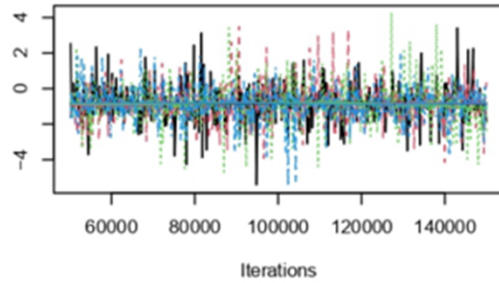

**Density of d.AV\_AE.AV\_AE\_cLSC**

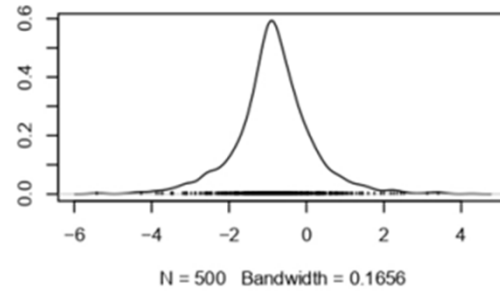

**Trace of d.AV\_AE.AV\_AE\_iLS**

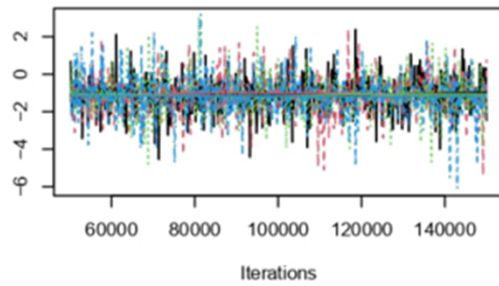

**Density of d.AV\_AE.AV\_AE\_iLS**

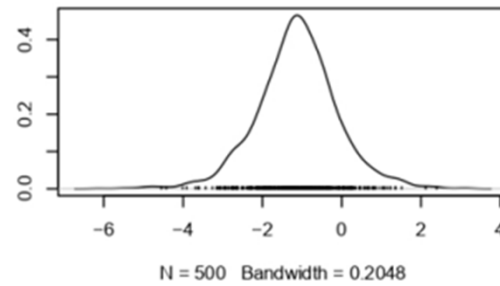

**Trace of d.AV\_AE.AV\_AE\_sgLS**

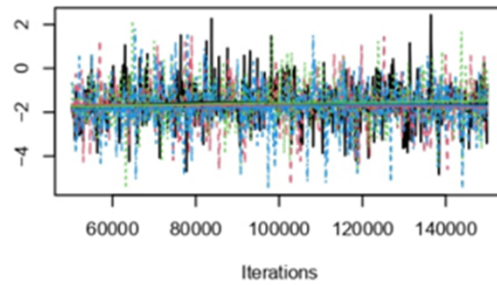

**Density of d.AV\_AE.AV\_AE\_sgLS**

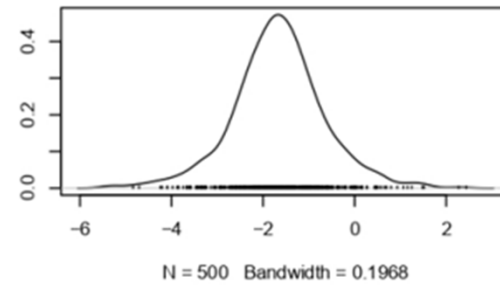

**Trace of d.AV\_SR.EPI\_LSE**

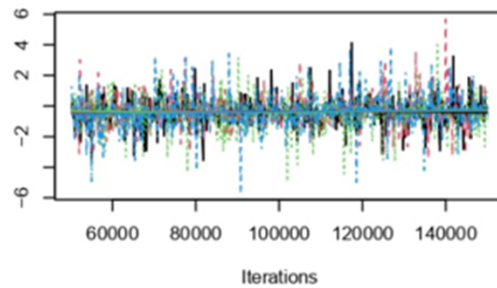

**Density of d.AV\_SR.EPI\_LSE**

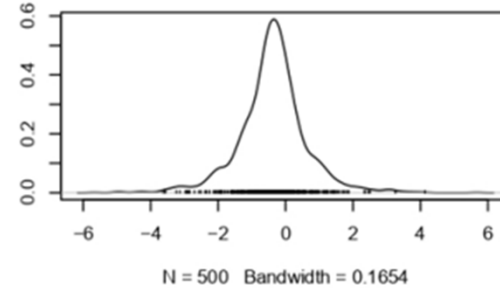

**Trace of sd.d**

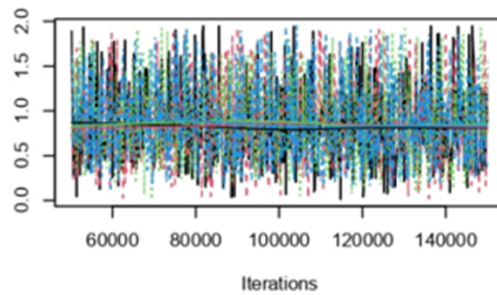

**Density of sd.d**

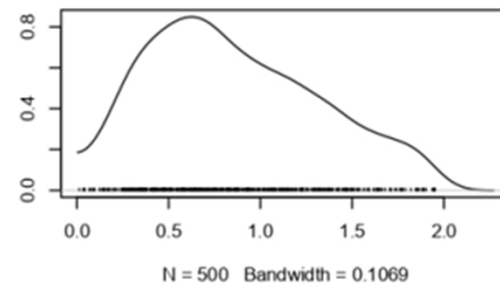



**Supplementary Fig. 5F.** Gelman-Rubin-Brooks in fixed model for the pain score measured at 1 mo after acute herpes zoster

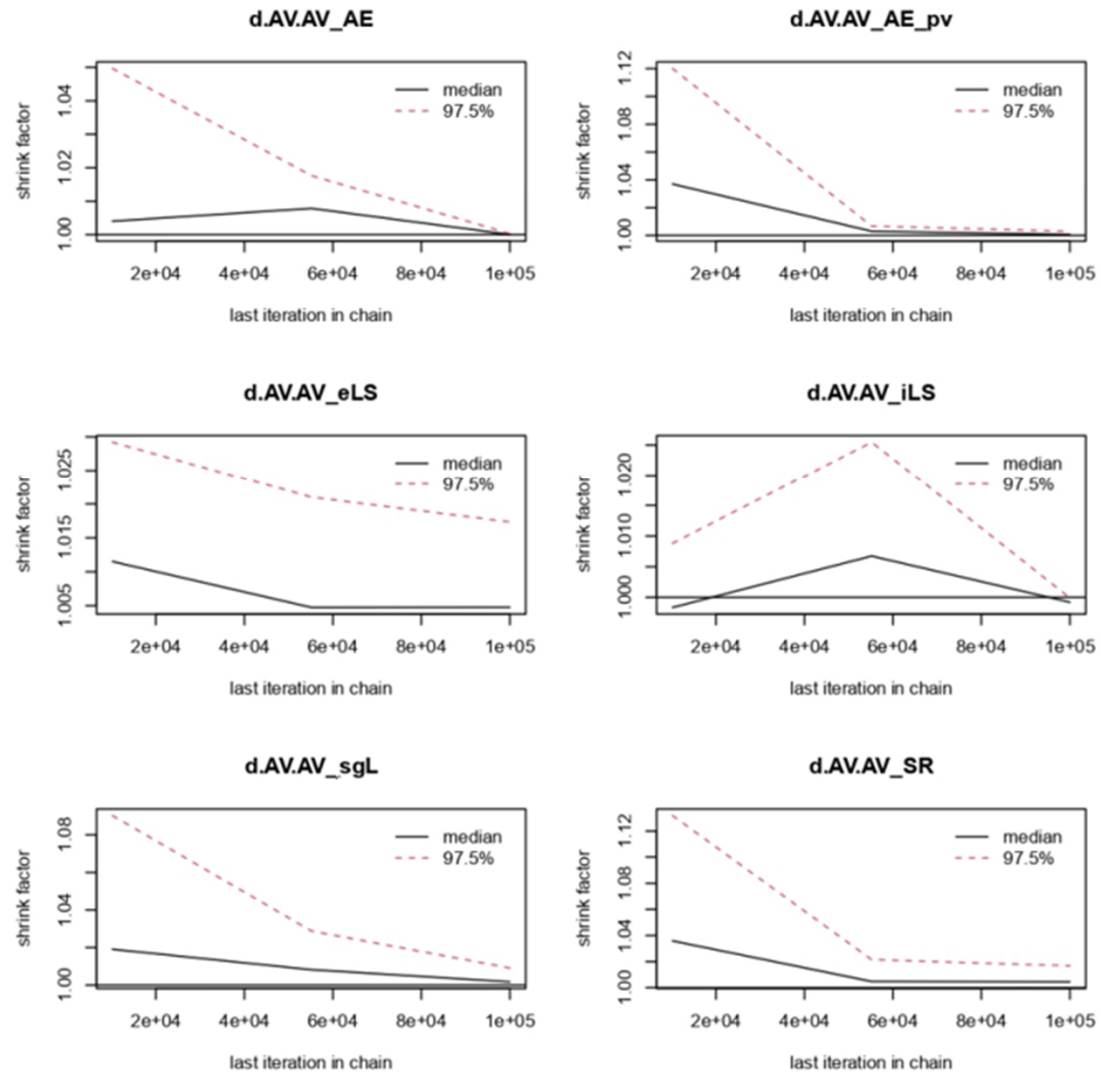

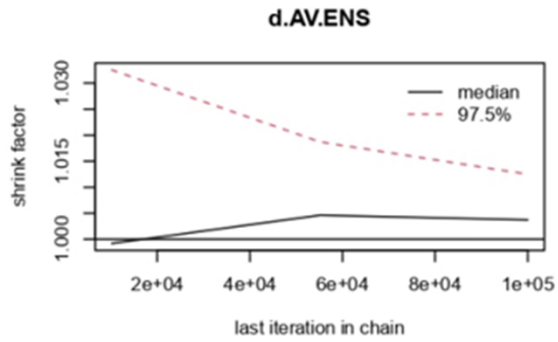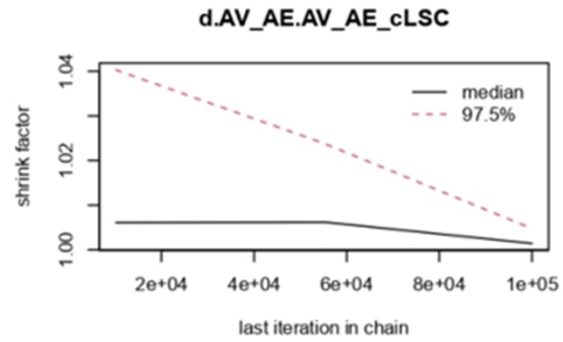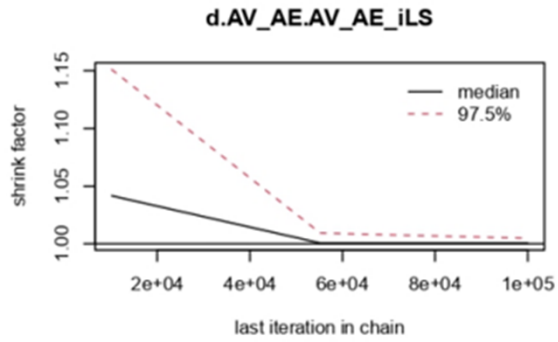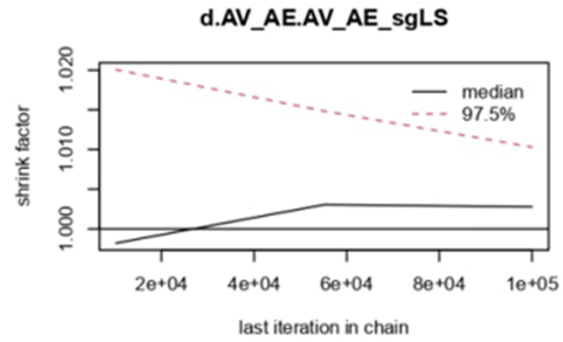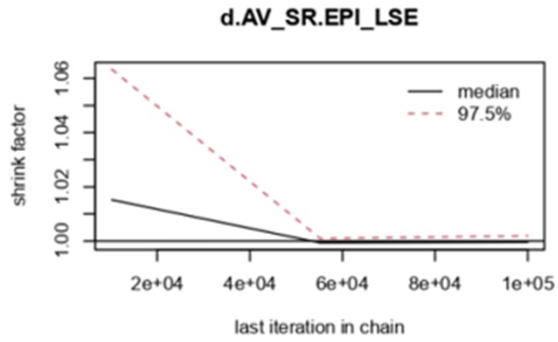

**Supplementary Fig. 5G.** Gelman-Rubin-Brooks in random model for the pain score measured at 1 mo after acute herpes zoster

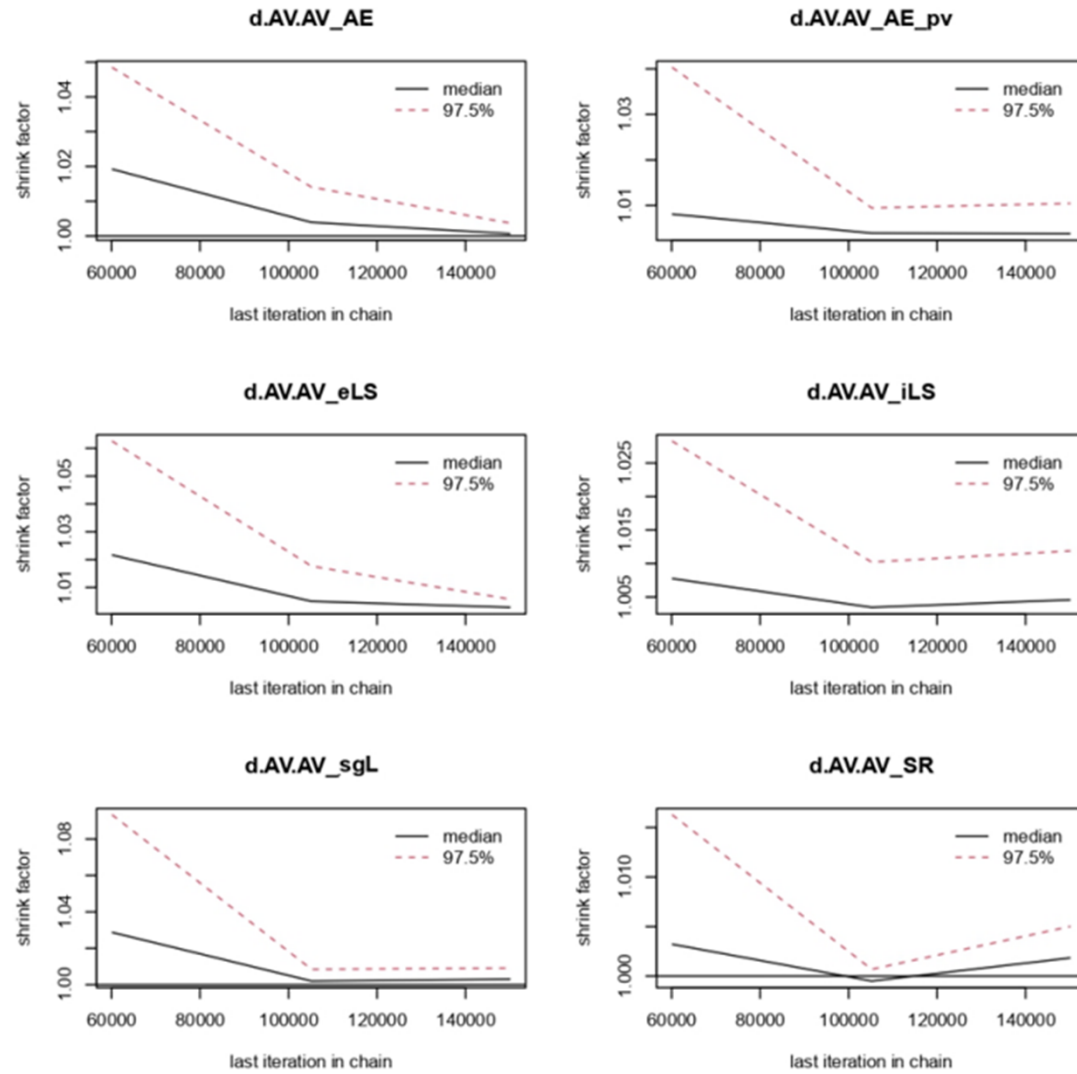

**d.AV.ENS**

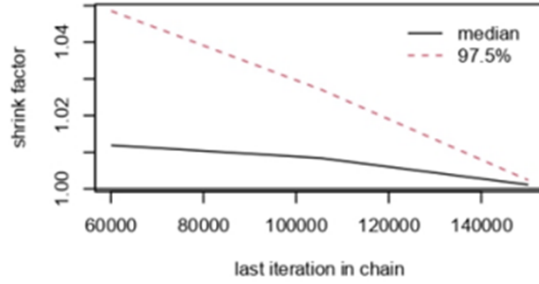

**d.AV\_AE.AV\_AE\_cLSC**

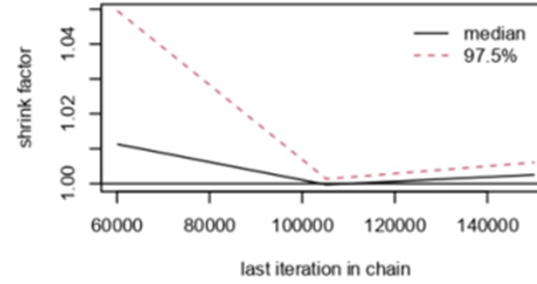

**d.AV\_AE.AV\_AE\_iLS**

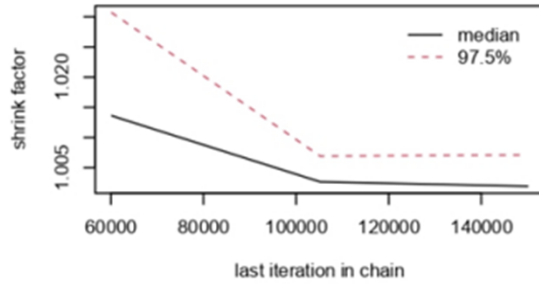

**d.AV\_AE.AV\_AE\_sgLS**

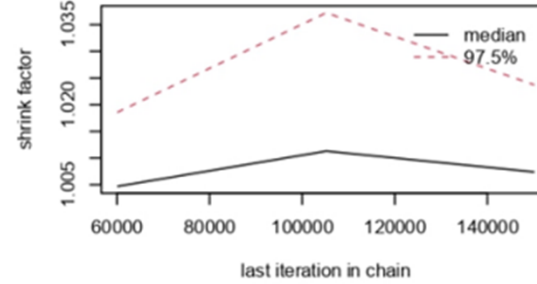

**d.AV\_SR.EPI\_LSE**

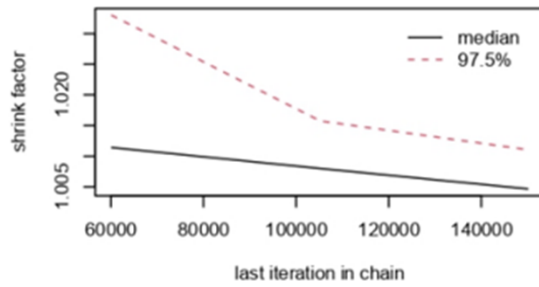

**sd.d**

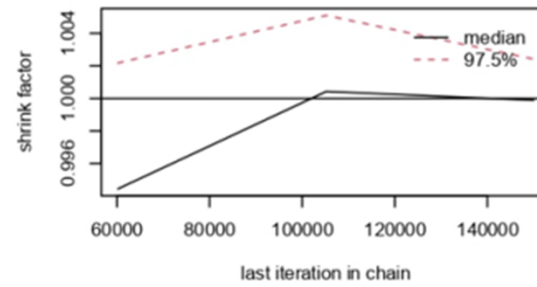

Supplement: kjp-34-4-509-supple.pdf [file kjp-34-4-509-supple.pdf]
